# Supplementary material for: O–O Bond activation in H2O2 and (CH3)3C-OOH mediated by [Ni(cyclam)(CH3CN)2](ClO4)2: Different mechanisms to form the same Ni(iii) product?
Source: Royal Society of Chemistry journal article supplement (doi:10.1039/c0dt01605e), 2011-01-01
Supplement: c0dt01605e.pdf [file c0dt01605e.pdf]

## **SUPPLEMENTARY INFORMATION**

**O-O bond activation in H<sub>2</sub>O<sub>2</sub> and (CH<sub>3</sub>)<sub>3</sub>C-OOH mediated by [Ni(cyclam)(CH<sub>3</sub>CN)<sub>2</sub>](ClO<sub>4</sub>)<sub>2</sub>: Different mechanisms to form the same Ni(III) product?**

**Xavier Solans-Monfort,\* José Luis G. Fierro, Laura Hermosilla, Carlos Sieiro Mariona Sodupe and Rubén Mas-Ballesté,\***

### a) Homolysis

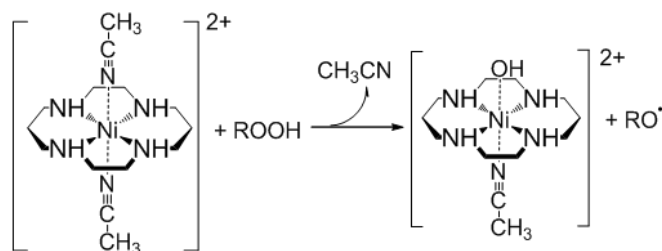

#### HOOH

|        | 1         | 3               |
|--------|-----------|-----------------|
| PBEPBE | 0.0 (0.0) | +39.5 (-16.8)   |
| BLYP   | 0.0 (0.0) | +16.1 (-34.7)   |
| OLYP   | 0.0 (0.0) | +33.4 (-25.2)   |
| OPBE   | 0.0 (0.0) | +41.5 (-5.7)    |
| B3LYP  | 0.0 (0.0) | +78.8 (+25.6)   |
| BHLYP  | 0.0 (0.0) | +148.9 (+108.5) |

#### tBuOOH

|        | 1         | 3              |
|--------|-----------|----------------|
| PBEPBE | 0.0 (0.0) | -38.8 (-104.6) |
| BLYP   | 0.0 (0.0) | -66.4 (-125.4) |
| OLYP   | 0.0 (0.0) | -50.4 (-80.5)  |
| OPBE   | 0.0 (0.0) | -0.9 (-40.2)   |
| B3LYP  | 0.0 (0.0) | +7.2 (-57.2)   |
| BHLYP  | 0.0 (0.0) | +101.7 (+53.1) |

### b) Heterolysis (Acid media)

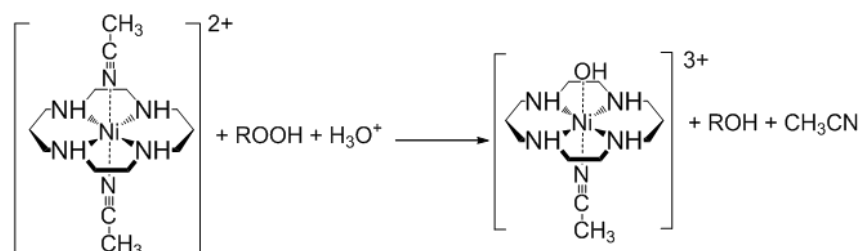

#### HOOH

|        | 1         | 4               |
|--------|-----------|-----------------|
| PBEPBE | 0.0 (0.0) | -126.8 (-148.8) |
| BLYP   | 0.0 (0.0) | -136.3 (-145.1) |
| OLYP   | 0.0 (0.0) | -66.4 (-73.7)   |
| OPBE   | 0.0 (0.0) | -70.1 (-33.1)   |
| B3LYP  | 0.0 (0.0) | -13.0 (-27.2)   |
| BHLYP  | 0.0 (0.0) | 181.2 (170.0)   |

#### tBuOOH

|        | 1         | 4               |
|--------|-----------|-----------------|
| PBEPBE | 0.0 (0.0) | -142.3 (-164.9) |
| BLYP   | 0.0 (0.0) | -159.3 (-173.0) |
| OLYP   | 0.0 (0.0) | -91.1 (-68.1)   |
| OPBE   | 0.0 (0.0) | -42.7 (+6.9)    |
| B3LYP  | 0.0 (0.0) | -34.3 (-48.5)   |
| BHLYP  | 0.0 (0.0) | +172.0 (162.1)  |

Figure S1

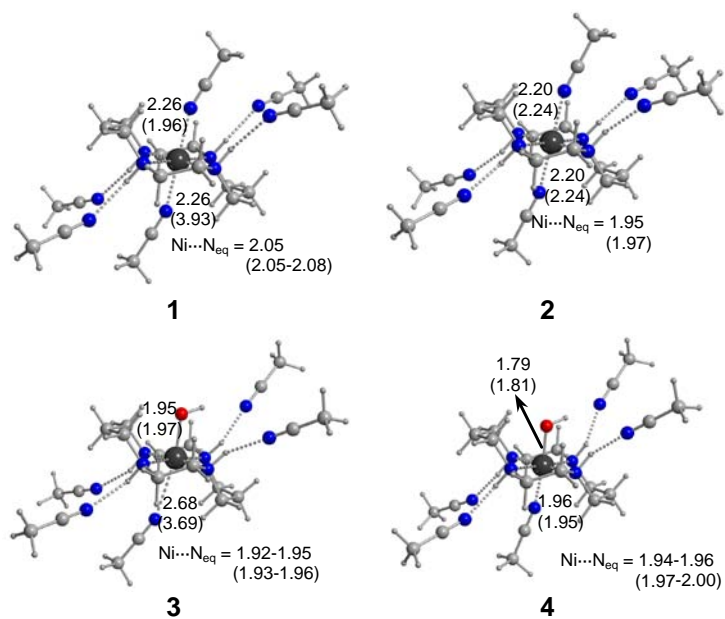

**Figure S2**

### 1-B3LYP

|    |           |           |           |
|----|-----------|-----------|-----------|
| C  | 0.657570  | 0.525258  | 0.294978  |
| C  | 0.455657  | 0.536805  | 2.963778  |
| C  | 1.257706  | 0.862971  | 1.681015  |
| H  | 0.433416  | -0.540254 | 0.213373  |
| H  | 1.408919  | 0.766605  | -0.469587 |
| H  | 1.080491  | 0.793496  | 3.830359  |
| H  | 0.228873  | -0.529840 | 3.025760  |
| H  | 1.510630  | 1.932589  | 1.695415  |
| H  | 2.214341  | 0.333438  | 1.755600  |
| C  | -4.516607 | 0.970237  | -0.106631 |
| C  | -4.718460 | 0.981875  | 2.562172  |
| C  | -5.318720 | 0.644303  | 1.176152  |
| H  | -5.141460 | 0.713632  | -0.973223 |
| H  | -4.289605 | 2.036832  | -0.168650 |
| H  | -5.469834 | 0.740689  | 3.326765  |
| H  | -4.494067 | 2.047338  | 2.643770  |
| H  | -6.275216 | 1.174091  | 1.101576  |
| H  | -5.571904 | -0.425257 | 1.161807  |
| Ni | -2.030477 | 0.753376  | 1.428582  |
| N  | -0.587756 | 1.300028  | 0.048536  |
| N  | -0.816766 | 1.306328  | 3.008277  |
| N  | -3.473306 | 0.206814  | 2.808527  |
| N  | -3.244322 | 0.200479  | -0.151063 |
| H  | -3.716627 | -0.775546 | 2.669638  |
| H  | -3.503253 | -0.781460 | -0.042260 |
| H  | -0.557962 | 2.288316  | 2.899614  |
| H  | -0.344653 | 2.282454  | 0.187289  |
| C  | -2.828115 | 0.260005  | 4.153374  |
| C  | -1.658646 | 1.261950  | 4.239520  |
| C  | -2.402433 | 0.244623  | -1.382296 |
| C  | -1.232916 | 1.246538  | -1.296322 |
| H  | -3.005489 | 0.475832  | -2.269476 |
| H  | -2.014103 | -0.768171 | -1.518847 |
| H  | -0.502233 | 1.010303  | -2.080262 |
| H  | -1.596233 | 2.258226  | -1.495873 |
| H  | -2.047010 | 2.274703  | 4.376267  |
| H  | -1.055585 | 1.030623  | 5.126664  |
| H  | -2.464731 | -0.751718 | 4.352651  |
| H  | -3.558775 | 0.496010  | 4.937405  |
| N  | -4.423659 | -2.785103 | 3.506003  |
| C  | -5.125069 | -3.474373 | 4.124683  |
| C  | -6.004844 | -4.341141 | 4.904067  |
| H  | -6.320277 | -5.197005 | 4.300579  |
| H  | -5.480696 | -4.706487 | 5.791813  |
| H  | -6.892395 | -3.785887 | 5.220722  |
| N  | -4.060283 | -2.787776 | -1.026128 |
| C  | -4.651410 | -3.451877 | -1.774093 |
| C  | -5.392907 | -4.285952 | -2.716076 |
| H  | -4.847278 | -4.359922 | -3.661121 |
| H  | -5.526407 | -5.290444 | -2.304547 |
| H  | -6.377107 | -3.849219 | -2.908297 |
| N  | -0.000191 | 4.293732  | 3.882812  |
| N  | 0.360923  | 4.292082  | -0.652317 |
| C  | 0.590358  | 4.958967  | 4.630223  |
| C  | 1.061130  | 4.980662  | -1.273127 |
| C  | 1.330920  | 5.795051  | 5.571157  |
| H  | 1.806969  | 6.625424  | 5.042018  |
| H  | 0.652685  | 6.198704  | 6.328397  |
| H  | 2.104555  | 5.203248  | 6.068747  |
| C  | 1.939385  | 5.846556  | -2.055200 |
| H  | 2.827559  | 5.291678  | -2.370767 |
| H  | 1.414350  | 6.208837  | -2.943678 |
| H  | 2.253903  | 6.704463  | -1.454143 |
| N  | -1.496007 | -1.430849 | 1.471969  |
| N  | -2.564796 | 2.938023  | 1.385016  |

|   |           |           |          |
|---|-----------|-----------|----------|
| C | -2.505877 | 4.095166  | 1.395054 |
| C | -1.554602 | -2.587998 | 1.461387 |
| C | -2.419620 | 5.547746  | 1.409327 |
| H | -1.962278 | 5.868811  | 2.349384 |
| H | -1.791955 | 5.875755  | 0.576064 |
| H | -3.416080 | 5.988529  | 1.315263 |
| C | -1.640432 | -4.040588 | 1.446388 |
| H | -2.272750 | -4.368798 | 2.276050 |
| H | -2.092323 | -4.361625 | 0.503695 |
| H | -0.644419 | -4.481151 | 1.546063 |

E = -2919.14203486

G = -2918.598855

E +  $\Delta G_{\text{solv}}$  = -2919.239134

### 2-B3LYP

|    |           |           |           |
|----|-----------|-----------|-----------|
| C  | 0.632462  | 0.525593  | 0.322224  |
| C  | 0.421168  | 0.532357  | 2.946920  |
| C  | 1.260909  | 0.832687  | 1.692899  |
| H  | 0.438805  | -0.537989 | 0.180192  |
| H  | 1.330077  | 0.850889  | -0.458294 |
| H  | 0.985246  | 0.860509  | 3.827776  |
| H  | 0.206470  | -0.530606 | 3.060323  |
| H  | 1.554607  | 1.889699  | 1.713349  |
| H  | 2.191084  | 0.260069  | 1.768931  |
| C  | -4.481513 | 0.975071  | -0.090750 |
| C  | -4.692827 | 0.981820  | 2.533945  |
| C  | -5.321466 | 0.675205  | 1.163247  |
| H  | -5.045683 | 0.647181  | -0.971645 |
| H  | -4.266242 | 2.037920  | -0.204142 |
| H  | -5.390561 | 0.656766  | 3.314463  |
| H  | -4.498658 | 2.045292  | 2.676092  |
| H  | -6.251277 | 1.248417  | 1.087247  |
| H  | -5.615778 | -0.381632 | 1.142736  |
| Ni | -2.030285 | 0.753320  | 1.428095  |
| N  | -0.641881 | 1.286049  | 0.138390  |
| N  | -0.865052 | 1.293706  | 2.920437  |
| N  | -3.418836 | 0.220731  | 2.717620  |
| N  | -3.195691 | 0.213040  | -0.064097 |
| H  | -3.669016 | -0.767679 | 2.563901  |
| H  | -3.466051 | -0.774345 | 0.054400  |
| H  | -0.595236 | 2.281244  | 2.802097  |
| H  | -0.392099 | 2.274581  | 0.291794  |
| C  | -2.787135 | 0.228856  | 4.086032  |
| C  | -1.705833 | 1.290433  | 4.170894  |
| C  | -2.354868 | 0.215706  | -1.314493 |
| C  | -1.273546 | 1.277301  | -1.230056 |
| H  | -2.989472 | 0.370764  | -2.192755 |
| H  | -1.923482 | -0.784254 | -1.396294 |
| H  | -0.507677 | 1.120816  | -1.996276 |
| H  | -1.688065 | 2.276419  | -1.381115 |
| H  | -2.137210 | 2.290350  | 4.253191  |
| H  | -1.071204 | 1.135001  | 5.049066  |
| H  | -2.372638 | -0.770340 | 4.236626  |
| H  | -3.552979 | 0.385000  | 4.852351  |
| N  | -4.535515 | -2.477633 | 3.293113  |
| C  | -5.213280 | -3.249043 | 3.837577  |
| C  | -6.063537 | -4.216076 | 4.524068  |
| H  | -6.291370 | -5.054948 | 3.859933  |
| H  | -5.555040 | -4.595539 | 5.415414  |
| H  | -7.000917 | -3.739911 | 4.827027  |
| N  | -4.171210 | -2.504672 | -0.836603 |
| C  | -4.743843 | -3.257230 | -1.512636 |
| C  | -5.461568 | -4.200041 | -2.364449 |
| H  | -4.927356 | -4.331437 | -3.310209 |

|   |           |           |           |
|---|-----------|-----------|-----------|
| H | -5.544514 | -5.170314 | -1.865989 |
| H | -6.466981 | -3.822866 | -2.574327 |
| N | 0.106933  | 4.012105  | 3.694903  |
| N | 0.475214  | 3.983931  | -0.439509 |
| C | 0.678581  | 4.764725  | 4.371701  |
| C | 1.150793  | 4.755032  | -0.987123 |
| C | 1.394561  | 5.708348  | 5.224039  |
| H | 1.841739  | 6.500187  | 4.615968  |
| H | 0.706106  | 6.158754  | 5.945345  |
| H | 2.189022  | 5.189976  | 5.769333  |
| C | 1.998416  | 5.721520  | -1.677641 |
| H | 2.941025  | 5.249194  | -1.970206 |
| H | 1.492783  | 6.088794  | -2.575698 |
| H | 2.216112  | 6.568372  | -1.020269 |
| N | -1.468410 | -1.409921 | 1.475887  |
| N | -2.591624 | 2.917205  | 1.380360  |
| C | -2.653648 | 4.075177  | 1.382264  |
| C | -1.405410 | -2.567831 | 1.474702  |
| C | -2.741001 | 5.526901  | 1.389637  |
| H | -1.855175 | 5.937058  | 1.883465  |
| H | -2.789735 | 5.901669  | 0.362673  |
| H | -3.638171 | 5.845297  | 1.929950  |
| C | -1.315992 | -4.019430 | 1.467687  |
| H | -1.264541 | -4.393794 | 2.494666  |
| H | -2.202150 | -4.431149 | 0.975807  |
| H | -0.419457 | -4.336602 | 0.925586  |

E = -2918.72751408

G = -2918.174726

E +  $\Delta G_{\text{solv}}$  = -2919.030203

### 3-B3LYP-doublet

|    |           |           |           |
|----|-----------|-----------|-----------|
| C  | 0.656900  | 0.333659  | 0.292561  |
| C  | 0.394155  | 0.462350  | 2.888399  |
| C  | 1.299145  | 0.630018  | 1.657357  |
| H  | 0.315387  | -0.702623 | 0.232454  |
| H  | 1.400903  | 0.495961  | -0.497255 |
| H  | 0.965576  | 0.718599  | 3.788266  |
| H  | 0.036194  | -0.565534 | 2.984481  |
| H  | 1.704359  | 1.649885  | 1.653081  |
| H  | 2.157573  | -0.039348 | 1.775738  |
| C  | -4.317369 | 0.831344  | -0.231795 |
| C  | -4.575109 | 0.960178  | 2.365338  |
| C  | -5.172647 | 0.547602  | 1.011901  |
| H  | -4.841845 | 0.459558  | -1.119251 |
| H  | -4.112961 | 1.897653  | -0.335959 |
| H  | -5.267217 | 0.669144  | 3.163556  |
| H  | -4.388591 | 2.034006  | 2.410265  |
| H  | -6.121693 | 1.080667  | 0.891390  |
| H  | -5.421543 | -0.521768 | 1.040429  |
| Ni | -1.928899 | 0.876477  | 1.317823  |
| N  | -0.506432 | 1.236028  | 0.044087  |
| N  | -0.781745 | 1.377462  | 2.799716  |
| N  | -3.275915 | 0.256061  | 2.601240  |
| N  | -3.006098 | 0.117546  | -0.135553 |
| H  | -3.460017 | -0.743506 | 2.466802  |
| H  | -3.226580 | -0.863937 | 0.061927  |
| H  | -0.403047 | 2.321843  | 2.666426  |
| H  | -0.188986 | 2.207109  | 0.168535  |
| C  | -2.694023 | 0.369232  | 3.979679  |
| C  | -1.663650 | 1.483652  | 4.005470  |
| C  | -2.163585 | 0.086198  | -1.375824 |
| C  | -1.126496 | 1.194499  | -1.318853 |
| H  | -2.791931 | 0.178680  | -2.267094 |
| H  | -1.688205 | -0.897258 | -1.409233 |
| H  | -0.355644 | 1.060779  | -2.086320 |
| H  | -1.593190 | 2.170365  | -1.468632 |

|   |           |           |           |
|---|-----------|-----------|-----------|
| H | -2.149037 | 2.458790  | 3.934871  |
| H | -1.062334 | 1.458539  | 4.920433  |
| H | -2.239469 | -0.597392 | 4.211089  |
| H | -3.485755 | 0.545904  | 4.714322  |
| N | -4.705588 | -2.329104 | 3.517397  |
| C | -5.460255 | -2.975376 | 4.119021  |
| C | -6.409840 | -3.785165 | 4.877481  |
| H | -6.878492 | -4.526071 | 4.223598  |
| H | -5.894817 | -4.304145 | 5.690921  |
| H | -7.189260 | -3.146717 | 5.303277  |
| N | -4.220122 | -2.553939 | -1.099948 |
| C | -4.811722 | -3.284514 | -1.782092 |
| C | -5.555757 | -4.200516 | -2.642356 |
| H | -4.863544 | -4.793951 | -3.246457 |
| H | -6.165391 | -4.875253 | -2.034746 |
| H | -6.212759 | -3.635945 | -3.310201 |
| N | 0.770157  | 3.799144  | 3.715664  |
| N | 0.136545  | 4.164749  | -0.178447 |
| C | 1.284786  | 4.624730  | 4.349207  |
| C | 0.425782  | 5.223927  | -0.554591 |
| C | 1.931749  | 5.661629  | 5.147576  |
| H | 2.911434  | 5.903184  | 4.725578  |
| H | 1.315299  | 6.565044  | 5.158239  |
| H | 2.066076  | 5.312850  | 6.175504  |
| C | 0.787345  | 6.555076  | -1.029454 |
| H | 1.849916  | 6.740582  | -0.848229 |
| H | 0.591271  | 6.634252  | -2.102614 |
| H | 0.197201  | 7.311610  | -0.504305 |
| N | -1.431634 | -2.127781 | 1.508019  |
| C | -1.400226 | -3.284958 | 1.599894  |
| C | -1.360792 | -4.738240 | 1.715610  |
| H | -2.355500 | -5.115167 | 1.969240  |
| H | -1.042125 | -5.180435 | 0.767369  |
| H | -0.656649 | -5.033472 | 2.498851  |
| O | -2.632616 | 2.705200  | 1.204294  |
| H | -1.968785 | 3.373568  | 0.976967  |

E = -2862.15809824

G = -2861.642310

E +  $\Delta G_{\text{solv}}$  = -2862.267856

### 3-B3LYP-quartet

|    |           |           |           |
|----|-----------|-----------|-----------|
| C  | 0.690382  | 0.245629  | 0.458180  |
| C  | 0.280764  | 0.281246  | 3.041859  |
| C  | 1.268039  | 0.427330  | 1.871162  |
| H  | 0.183625  | -0.721211 | 0.382687  |
| H  | 1.511380  | 0.247374  | -0.271138 |
| H  | 0.836440  | 0.309172  | 3.988341  |
| H  | -0.246566 | -0.676239 | 2.988228  |
| H  | 1.775411  | 1.398124  | 1.945105  |
| H  | 2.048243  | -0.330420 | 2.001269  |
| C  | -4.220196 | 0.649881  | -0.257858 |
| C  | -4.635504 | 0.876890  | 2.338622  |
| C  | -5.083665 | 0.325839  | 0.973841  |
| H  | -4.671742 | 0.167577  | -1.131619 |
| H  | -4.166122 | 1.726441  | -0.435804 |
| H  | -5.360618 | 0.560323  | 3.097152  |
| H  | -4.586733 | 1.969173  | 2.335156  |
| H  | -6.088973 | 0.712371  | 0.774241  |
| H  | -5.188718 | -0.764332 | 1.053256  |
| Ni | -1.919803 | 1.228734  | 1.390018  |
| N  | -0.289851 | 1.310366  | 0.101741  |
| N  | -0.715724 | 1.387633  | 3.033602  |
| N  | -3.286744 | 0.341422  | 2.693720  |
| N  | -2.823402 | 0.128954  | -0.105995 |
| H  | -3.327389 | -0.666442 | 2.529342  |
| H  | -2.896029 | -0.846062 | 0.192573  |

|   |           |           |           |
|---|-----------|-----------|-----------|
| H | -0.185417 | 2.268178  | 3.008685  |
| H | 0.155987  | 2.226098  | 0.184831  |
| C | -2.812266 | 0.502572  | 4.099003  |
| C | -1.645887 | 1.497733  | 4.192809  |
| C | -1.962603 | 0.131463  | -1.325555 |
| C | -0.883685 | 1.221928  | -1.260181 |
| H | -2.572155 | 0.269487  | -2.223546 |
| H | -1.507013 | -0.858492 | -1.399420 |
| H | -0.112876 | 1.022180  | -2.015494 |
| H | -1.314031 | 2.203534  | -1.473194 |
| H | -2.019637 | 2.525027  | 4.178901  |
| H | -1.103230 | 1.351956  | 5.134879  |
| H | -2.505355 | -0.485031 | 4.451945  |
| H | -3.627998 | 0.834522  | 4.748732  |
| N | -4.780934 | -2.253835 | 3.774758  |
| C | -5.526659 | -2.872045 | 4.416112  |
| C | -6.466410 | -3.646632 | 5.222769  |
| H | -7.094235 | -4.266598 | 4.576530  |
| H | -5.922158 | -4.293926 | 5.916313  |
| H | -7.108788 | -2.974077 | 5.798336  |
| N | -4.059128 | -2.497173 | -1.496031 |
| C | -4.580629 | -3.202638 | -2.257602 |
| C | -5.237139 | -4.086436 | -3.217707 |
| H | -4.488796 | -4.644686 | -3.787389 |
| H | -5.885985 | -4.794525 | -2.694545 |
| H | -5.844160 | -3.499424 | -3.912847 |
| N | 1.017553  | 3.791594  | 3.627344  |
| N | -0.496933 | 4.572362  | -0.164220 |
| C | 1.639572  | 4.592414  | 4.192190  |
| C | -0.232661 | 5.602211  | -0.631038 |
| C | 2.419574  | 5.599408  | 4.904723  |
| H | 3.338483  | 5.820469  | 4.354303  |
| H | 1.836383  | 6.518708  | 5.009690  |
| H | 2.683300  | 5.231430  | 5.900405  |
| C | 0.096128  | 6.895847  | -1.218802 |
| H | 1.174665  | 7.069106  | -1.163583 |
| H | -0.215542 | 6.919974  | -2.266976 |
| H | -0.421656 | 7.692047  | -0.676012 |
| N | -1.674886 | -2.349374 | 1.537069  |
| C | -1.716342 | -3.506754 | 1.624476  |
| C | -1.765691 | -4.960261 | 1.733429  |
| H | -2.761413 | -5.273040 | 2.059832  |
| H | -1.548730 | -5.414949 | 0.762707  |
| H | -1.026479 | -5.307493 | 2.461016  |
| O | -2.510222 | 2.904946  | 1.189157  |
| H | -1.858552 | 3.555643  | 0.847656  |

E = -2862.13275164

G =

E +  $\Delta G_{\text{soln}}$  = -2862.239034

#### 4-B3LYP-singlet

|   |           |           |           |
|---|-----------|-----------|-----------|
| C | 0.806111  | 0.174552  | 0.360043  |
| C | 0.512905  | 0.308871  | 2.973602  |
| C | 1.409102  | 0.498622  | 1.737541  |
| H | 0.559882  | -0.880873 | 0.240908  |
| H | 1.542904  | 0.433008  | -0.410357 |
| H | 1.063862  | 0.664219  | 3.852459  |
| H | 0.236150  | -0.731146 | 3.147748  |
| H | 1.768861  | 1.534821  | 1.730337  |
| H | 2.298652  | -0.126522 | 1.866851  |
| C | -4.269383 | 1.039784  | -0.242449 |
| C | -4.553167 | 1.178323  | 2.359849  |
| C | -5.170306 | 0.860251  | 0.989156  |
| H | -4.829460 | 0.734106  | -1.135044 |
| H | -3.941596 | 2.070640  | -0.367752 |

|    |           |           |           |
|----|-----------|-----------|-----------|
| H  | -5.295029 | 0.960871  | 3.138578  |
| H  | -4.249792 | 2.220931  | 2.448980  |
| H  | -6.039951 | 1.512482  | 0.859656  |
| H  | -5.560182 | -0.165962 | 1.000594  |
| Ni | -1.878678 | 0.621544  | 1.366361  |
| N  | -0.417074 | 0.997232  | 0.099484  |
| N  | -0.719786 | 1.146558  | 2.863126  |
| N  | -3.376523 | 0.299825  | 2.631886  |
| N  | -3.071246 | 0.151098  | -0.157130 |
| H  | -3.705533 | -0.672365 | 2.512802  |
| H  | -3.429947 | -0.805581 | -0.009273 |
| H  | -0.375769 | 2.107999  | 2.700964  |
| H  | -0.146458 | 1.981523  | 0.249228  |
| C  | -2.778852 | 0.333545  | 4.011154  |
| C  | -1.606403 | 1.295388  | 4.072206  |
| C  | -2.191329 | 0.033664  | -1.370046 |
| C  | -1.008885 | 0.984286  | -1.287617 |
| H  | -2.778311 | 0.233300  | -2.272268 |
| H  | -1.864011 | -1.007279 | -1.416234 |
| H  | -0.238055 | 0.704552  | -2.012915 |
| H  | -1.311684 | 2.012189  | -1.497986 |
| H  | -1.946406 | 2.331922  | 4.069458  |
| H  | -1.016671 | 1.133217  | 4.979535  |
| H  | -2.474708 | -0.689682 | 4.243403  |
| H  | -3.546472 | 0.621456  | 4.736637  |
| N  | -4.542651 | -2.353719 | 3.215910  |
| C  | -5.305631 | -3.034715 | 3.769016  |
| C  | -6.261953 | -3.887840 | 4.465859  |
| H  | -6.369945 | -4.840644 | 3.939074  |
| H  | -5.916248 | -4.082211 | 5.485713  |
| H  | -7.237934 | -3.394817 | 4.510136  |
| N  | -4.058355 | -2.592559 | -0.763563 |
| C  | -4.661721 | -3.327039 | -1.433516 |
| C  | -5.415656 | -4.248544 | -2.276526 |
| H  | -4.752524 | -4.707114 | -3.016399 |
| H  | -5.865658 | -5.035930 | -1.664537 |
| H  | -6.211092 | -3.709006 | -2.799731 |
| N  | 0.592807  | 3.644898  | 3.517237  |
| N  | -0.198674 | 3.945224  | -0.032197 |
| C  | 1.098904  | 4.498240  | 4.121768  |
| C  | 0.118418  | 4.988005  | -0.435206 |
| C  | 1.734004  | 5.568360  | 4.882804  |
| H  | 2.710263  | 5.807254  | 4.450498  |
| H  | 1.105554  | 6.463813  | 4.865405  |
| H  | 1.874700  | 5.254678  | 5.921582  |
| C  | 0.513893  | 6.294461  | -0.943203 |
| H  | 1.583722  | 6.451892  | -0.774944 |
| H  | 0.309362  | 6.355019  | -2.016593 |
| H  | -0.049804 | 7.079070  | -0.428925 |
| N  | -1.529434 | -1.327162 | 1.506283  |
| C  | -1.530784 | -2.482779 | 1.569134  |
| C  | -1.517005 | -3.932230 | 1.642013  |
| H  | -1.628314 | -4.250090 | 2.683552  |
| H  | -2.352412 | -4.320670 | 1.051105  |
| H  | -0.573362 | -4.319074 | 1.243024  |
| O  | -2.371822 | 2.360777  | 1.284814  |
| H  | -1.667435 | 2.953534  | 0.951458  |

E = -2861.71175102

G = -2861.181108

E +  $\Delta G_{\text{soln}}$  = -2862.035764

#### 4-B3LYP-triplet

|   |          |           |          |
|---|----------|-----------|----------|
| C | 1.119015 | -0.078661 | 0.856645 |
| C | 0.575475 | -0.156821 | 3.430426 |
| C | 1.612067 | 0.035274  | 2.309458 |

|    |           |           |           |
|----|-----------|-----------|-----------|
| H  | 0.777853  | -1.085167 | 0.612055  |
| H  | 1.949650  | 0.168579  | 0.185016  |
| H  | 1.063814  | 0.041934  | 4.392066  |
| H  | 0.178393  | -1.172109 | 3.461781  |
| H  | 2.098026  | 1.009232  | 2.441482  |
| H  | 2.399418  | -0.712710 | 2.450197  |
| C  | -3.752675 | 1.280124  | -0.103766 |
| C  | -4.271234 | 1.228066  | 2.464598  |
| C  | -4.782381 | 1.091851  | 1.022337  |
| H  | -4.253123 | 1.135124  | -1.068868 |
| H  | -3.322690 | 2.286542  | -0.105126 |
| H  | -5.105023 | 1.051700  | 3.154295  |
| H  | -3.872919 | 2.226586  | 2.667242  |
| H  | -5.574198 | 1.834821  | 0.878270  |
| H  | -5.261103 | 0.111761  | 0.902891  |
| Ni | -1.619353 | 0.508532  | 1.653407  |
| N  | -0.002546 | 0.877400  | 0.576377  |
| N  | -0.557620 | 0.807022  | 3.281000  |
| N  | -3.211471 | 0.213699  | 2.759270  |
| N  | -2.652212 | 0.271149  | 0.002247  |
| H  | -3.634234 | -0.706007 | 2.552805  |
| H  | -3.125389 | -0.647545 | -0.005653 |
| H  | -0.134014 | 1.735690  | 3.129450  |
| H  | 0.313666  | 1.802220  | 0.885494  |
| C  | -2.749277 | 0.095587  | 4.192221  |
| C  | -1.521109 | 0.958493  | 4.428237  |
| C  | -1.666949 | 0.181919  | -1.134066 |
| C  | -0.437841 | 1.035363  | -0.861340 |
| H  | -2.147708 | 0.477580  | -2.072302 |
| H  | -1.400627 | -0.873638 | -1.222129 |
| H  | 0.381881  | 0.760398  | -1.533019 |
| H  | -0.652497 | 2.095848  | -1.011380 |
| H  | -1.787973 | 2.017296  | 4.472878  |
| H  | -1.029503 | 0.693050  | 5.369598  |
| H  | -2.528504 | -0.961573 | 4.355901  |
| H  | -3.563659 | 0.370708  | 4.869993  |
| N  | -4.798808 | -2.256108 | 3.121789  |
| C  | -5.643155 | -2.905978 | 3.584169  |
| C  | -6.706696 | -3.703522 | 4.186702  |
| H  | -6.935138 | -4.568885 | 3.557420  |
| H  | -6.394643 | -4.055419 | 5.174802  |
| H  | -7.610519 | -3.096024 | 4.295511  |
| N  | -4.045257 | -2.133849 | -0.984339 |
| C  | -4.689301 | -2.811215 | -1.673575 |
| C  | -5.503351 | -3.655903 | -2.540663 |
| H  | -4.873198 | -4.137734 | -3.294229 |
| H  | -6.005521 | -4.427697 | -1.949959 |
| H  | -6.259839 | -3.049172 | -3.047777 |
| N  | 0.651792  | 3.458410  | 2.848310  |
| N  | -1.383953 | 4.440560  | -0.110942 |
| C  | 1.202797  | 4.371795  | 3.312293  |
| C  | -1.324589 | 5.385432  | -0.785225 |
| C  | 1.894041  | 5.510326  | 3.903297  |
| H  | 2.835632  | 5.692417  | 3.375619  |
| H  | 1.265702  | 6.404062  | 3.837789  |
| H  | 2.110957  | 5.305950  | 4.956823  |
| C  | -1.276739 | 6.586497  | -1.606651 |
| H  | -0.244820 | 6.940228  | -1.696066 |
| H  | -1.669505 | 6.374632  | -2.605989 |
| H  | -1.885413 | 7.368874  | -1.142056 |
| N  | -1.416276 | -1.728740 | 1.620627  |
| C  | -1.464650 | -2.887079 | 1.589778  |
| C  | -1.515425 | -4.340763 | 1.561101  |
| H  | -2.347435 | -4.688661 | 2.181092  |
| H  | -1.663846 | -4.686514 | 0.533731  |
| H  | -0.579658 | -4.757066 | 1.947770  |
| O  | -1.867693 | 2.627403  | 1.744453  |

H -1.676938 3.334881 1.018928

E = -2861.69427227

### tBuOOH·6H<sub>2</sub>O-B3LYP

|   |           |           |           |
|---|-----------|-----------|-----------|
| O | 0.427913  | -0.397039 | 0.317178  |
| H | 1.191679  | 0.232197  | 0.440991  |
| O | -0.656977 | 0.588814  | 0.193744  |
| O | 2.275614  | 1.591606  | 0.496967  |
| H | 1.886927  | 2.144338  | 1.198197  |
| H | 2.025742  | 2.028933  | -0.337090 |
| H | -1.580242 | 4.905519  | 2.742443  |
| O | -1.513895 | 4.344517  | 3.538448  |
| H | -2.354323 | 4.401444  | 4.006842  |
| H | -0.388991 | 2.998807  | 2.714561  |
| O | 0.106954  | 2.767813  | 1.904814  |
| H | -0.344527 | 2.008078  | 1.488882  |
| H | -0.342515 | 4.338869  | 1.096065  |
| O | -0.855949 | 5.159688  | 0.914182  |
| H | -0.215328 | 5.866574  | 0.765813  |
| H | 0.024050  | 1.559743  | -1.278839 |
| O | 0.567192  | 2.208869  | -1.773217 |
| H | 0.761374  | 1.810985  | -2.631441 |
| H | -1.659896 | 4.521680  | -0.856760 |
| O | -1.799556 | 3.985389  | -1.654617 |
| H | -0.936673 | 3.577567  | -1.833880 |
| C | -1.931546 | -0.128715 | 0.089414  |
| C | -1.951008 | -0.928748 | -1.216897 |
| H | -2.898712 | -1.468810 | -1.309923 |
| H | -1.856859 | -0.263376 | -2.081723 |
| H | -1.134988 | -1.654931 | -1.237893 |
| C | -2.117463 | -1.027528 | 1.314838  |
| H | -2.035234 | -0.443733 | 2.237258  |
| H | -3.112089 | -1.484467 | 1.286384  |
| H | -1.368729 | -1.821706 | 1.340440  |
| C | -2.953045 | 1.014462  | 0.067554  |
| H | -3.949308 | 0.599464  | -0.115165 |
| H | -2.978031 | 1.537410  | 1.029354  |
| H | -2.733784 | 1.746624  | -0.716117 |

E = -767.511524333

G = -767.274162

E +  $\Delta G_{\text{solv}}$  = -767.502017

### tBuO<sup>•</sup>·6H<sub>2</sub>O-B3LYP

|   |           |           |           |
|---|-----------|-----------|-----------|
| O | -0.883451 | 1.196445  | 0.056055  |
| H | -0.058483 | 1.579957  | -0.375042 |
| H | -1.635235 | 1.532499  | -0.446297 |
| O | 3.399497  | 1.012779  | 0.463048  |
| H | 4.083986  | 0.397998  | 0.176924  |
| O | 1.167160  | -2.508285 | 1.627816  |
| O | 1.329996  | 2.337809  | -0.806114 |
| H | 1.368238  | 3.119156  | -0.216963 |
| H | 2.111494  | 1.804861  | -0.539661 |
| H | 2.971029  | 0.621871  | 1.264618  |
| O | 2.007582  | 0.070433  | 2.616274  |
| H | 1.240718  | 0.667360  | 2.713980  |
| H | 1.646995  | -0.813836 | 2.423853  |
| O | -0.170700 | 1.936160  | 2.521807  |
| H | -0.872431 | 2.031712  | 3.176584  |
| H | -0.594226 | 1.667252  | 1.660746  |
| O | 1.282262  | 4.112346  | 1.412211  |
| H | 0.814216  | 3.454309  | 1.964531  |
| H | 2.159355  | 4.217405  | 1.801014  |
| C | -0.052199 | -3.074132 | 1.296073  |
| C | -0.126499 | -4.311521 | 2.255492  |



|   |           |           |           |
|---|-----------|-----------|-----------|
| H | -0.106531 | -3.990665 | 3.299678  |
| H | -1.071808 | -4.826491 | 2.056042  |
| H | 0.705883  | -4.993534 | 2.069407  |
| C | -1.220761 | -2.110585 | 1.567015  |
| H | -1.119991 | -1.208379 | 0.955469  |
| H | -2.178136 | -2.586533 | 1.327841  |
| H | -1.235401 | -1.817268 | 2.621876  |
| C | -0.019313 | -3.554113 | -0.170361 |
| H | 0.823918  | -4.231159 | -0.332142 |
| H | -0.949351 | -4.074664 | -0.421750 |
| H | 0.087199  | -2.696460 | -0.841225 |

E = -691.713991731

G = -691.494953

E +  $\Delta G_{\text{solv}}$  = -691.706323

### tBuOH·6H<sub>2</sub>O-B3LYP

|   |           |           |           |
|---|-----------|-----------|-----------|
| O | -0.539286 | 0.997674  | 0.188822  |
| H | 0.326303  | 1.349003  | -0.224304 |
| H | -0.020740 | -0.760783 | 0.746205  |
| H | -1.242643 | 1.155341  | -0.453014 |
| O | 3.106904  | -0.093581 | 0.727038  |
| H | 2.529401  | -0.857037 | 0.564541  |
| O | 0.484955  | -1.484904 | 1.170582  |
| O | 1.742066  | 1.877318  | -0.636034 |
| H | 1.888461  | 2.718183  | -0.154934 |
| H | 2.372049  | 1.224938  | -0.244150 |
| H | 2.902725  | 0.124038  | 1.660811  |
| O | 1.720737  | 0.148326  | 3.198311  |
| H | 1.151927  | 0.937558  | 3.195836  |
| H | 1.188211  | -0.541005 | 2.759148  |
| O | -0.110060 | 2.356840  | 2.526419  |
| H | -0.873868 | 2.659174  | 3.032533  |
| H | -0.451957 | 1.897533  | 1.720413  |
| O | 1.715294  | 4.032636  | 1.172408  |
| H | 1.115582  | 3.583565  | 1.801997  |
| H | 2.481091  | 4.331366  | 1.676933  |
| C | -0.258809 | -2.726536 | 1.101654  |
| C | 0.634592  | -3.772971 | 1.771841  |
| H | 0.846771  | -3.490739 | 2.808095  |
| H | 0.146009  | -4.752578 | 1.774283  |
| H | 1.586642  | -3.863556 | 1.239215  |
| C | -1.582727 | -2.564626 | 1.863912  |
| H | -2.201159 | -1.781990 | 1.409079  |
| H | -2.158548 | -3.496520 | 1.852313  |
| H | -1.392979 | -2.290225 | 2.906603  |
| C | -0.511569 | -3.080020 | -0.371150 |
| H | 0.435652  | -3.160896 | -0.913557 |
| H | -1.043137 | -4.033901 | -0.458820 |
| H | -1.120914 | -2.310291 | -0.859068 |

E = -692.393067497

G = -692.155600

E +  $\Delta G_{\text{solv}}$  = -692.385918

### HOOH·6H<sub>2</sub>O-B3LYP

|   |           |           |           |
|---|-----------|-----------|-----------|
| O | 0.115941  | 2.219673  | 0.730372  |
| H | 0.909503  | 1.922958  | 0.218451  |
| O | -0.982522 | 1.960242  | -0.186055 |
| H | -1.328364 | 1.049566  | 0.114461  |
| O | 2.173087  | 1.419799  | -0.922999 |
| H | 2.955120  | 1.971690  | -1.042153 |
| H | 1.686826  | 1.410677  | -1.771352 |
| H | -0.682739 | 2.050501  | 3.833130  |
| O | -0.245953 | 1.341009  | 3.347496  |
| H | -0.116414 | 1.674425  | 2.432539  |
| H | -1.678081 | -0.809436 | 1.212044  |

|   |           |           |           |
|---|-----------|-----------|-----------|
| O | -1.850549 | -0.418248 | 0.325485  |
| H | -1.439279 | -0.988578 | -0.355148 |
| H | -1.914035 | -1.470583 | 3.510799  |
| O | -1.239296 | -1.177605 | 2.887821  |
| H | -0.897937 | -0.313327 | 3.213908  |
| H | -0.452679 | 1.646199  | -1.800948 |
| O | 0.002032  | 1.270242  | -2.601630 |
| H | -0.363503 | 1.707609  | -3.380206 |
| H | 0.291321  | -1.957011 | -1.851880 |
| O | -0.531703 | -1.460655 | -1.935928 |
| H | -0.292790 | -0.593967 | -2.319225 |

E = -610.254681483

G = -610.121954

E +  $\Delta G_{\text{solv}}$  = -610.255567

### OH·6H<sub>2</sub>O-B3LYP

|   |           |           |           |
|---|-----------|-----------|-----------|
| O | -0.832864 | 0.750481  | 0.595091  |
| H | -0.023456 | 0.950783  | 0.010633  |
| H | -0.528251 | -0.830233 | 1.510328  |
| H | -1.613808 | 0.848124  | 0.036521  |
| O | 3.330499  | 0.236830  | 0.637938  |
| H | 3.847507  | -0.552693 | 0.442634  |
| O | -0.123439 | -1.494066 | 2.106787  |
| H | -0.838922 | -1.968175 | 2.545080  |
| O | 1.298863  | 1.389386  | -0.731012 |
| H | 1.468037  | 2.329586  | -0.537528 |
| H | 2.079753  | 0.903569  | -0.365644 |
| H | 2.945681  | 0.124519  | 1.544074  |
| O | 1.996546  | 0.090792  | 3.001589  |
| H | 1.527548  | 0.938271  | 3.082607  |
| H | 1.290181  | -0.572130 | 2.854665  |
| O | 0.129415  | 2.398132  | 2.558415  |
| H | -0.461688 | 2.743230  | 3.238773  |
| H | -0.409991 | 1.846623  | 1.941832  |
| O | 1.429113  | 3.990841  | 0.658672  |
| H | 1.035345  | 3.534537  | 1.450442  |

E = -534.433998046

G = -534.315335

E +  $\Delta G_{\text{solv}}$  = -534.432573

### OH·6H<sub>2</sub>O-B3LYP

|   |           |           |           |
|---|-----------|-----------|-----------|
| O | -0.697556 | 0.644751  | 0.882163  |
| H | 0.530570  | 1.094646  | -0.323206 |
| H | -0.141835 | -0.621436 | 1.366722  |
| H | -1.588113 | 0.659470  | 0.514843  |
| O | 2.962668  | -0.516180 | 0.807501  |
| H | 2.167805  | -1.071957 | 0.920561  |
| O | 0.420318  | -1.419729 | 1.757842  |
| H | -0.155468 | -2.189223 | 1.812408  |
| O | 1.328580  | 1.356035  | -0.850489 |
| H | 1.429834  | 3.195288  | -0.225529 |
| H | 2.041131  | 0.818211  | -0.458769 |
| H | 2.978504  | -0.028019 | 1.651534  |
| O | 1.930927  | 0.384768  | 3.445168  |
| H | 1.409848  | 1.185043  | 3.224171  |
| H | 1.362708  | -0.346839 | 3.139012  |
| O | 0.135168  | 2.411751  | 2.507089  |
| H | -0.562577 | 2.690754  | 3.110183  |
| H | -0.296028 | 1.737000  | 1.847545  |
| O | 1.333095  | 4.008448  | 0.311702  |
| H | 0.956487  | 3.665628  | 1.141443  |



E = -534.591867843  
G = -534.472479  
E +  $\Delta G_{\text{solv}}$  = -534.650412

### H<sub>2</sub>O·6H<sub>2</sub>O-B3LYP

|   |           |           |           |
|---|-----------|-----------|-----------|
| O | -0.833215 | 0.743681  | 0.598063  |
| H | -0.022830 | 0.930396  | 0.004905  |
| H | -0.546130 | -0.836791 | 1.498641  |
| H | -1.616433 | 0.868726  | 0.048275  |
| O | 3.342235  | 0.215484  | 0.674053  |
| H | 3.853920  | -0.581483 | 0.495408  |
| O | -0.152905 | -1.517269 | 2.085595  |
| H | -0.877457 | -1.972390 | 2.529086  |
| O | 1.289084  | 1.351655  | -0.739580 |
| H | 1.457938  | 2.284515  | -0.489613 |
| H | 2.059987  | 0.854570  | -0.376801 |
| H | 2.931484  | 0.104690  | 1.569102  |
| O | 1.964547  | 0.055924  | 3.015084  |
| H | 1.486206  | 0.899700  | 3.091456  |
| H | 1.264147  | -0.610121 | 2.854034  |
| O | 0.166700  | 2.370464  | 2.574316  |
| H | -0.441204 | 2.763177  | 3.212440  |
| H | -0.374806 | 1.846686  | 1.935911  |
| O | 1.574717  | 3.820903  | 0.588616  |
| H | 1.164509  | 3.470569  | 1.404709  |
| H | 2.475694  | 4.077262  | 0.820054  |

E = -535.131301537  
G = -534.998444  
E +  $\Delta G_{\text{solv}}$  = -535.131371

### H<sub>3</sub>O<sup>+</sup>·6H<sub>2</sub>O-B3LYP

|   |           |           |           |
|---|-----------|-----------|-----------|
| O | -1.090631 | 0.647939  | 0.542085  |
| H | 0.411561  | 1.101937  | -0.644062 |
| H | -0.476519 | -1.077010 | 1.075801  |
| H | -2.006399 | 0.741303  | 0.245033  |
| O | 2.374414  | -0.392438 | 0.872326  |
| H | 1.595964  | -1.029224 | 1.083767  |
| O | 0.246472  | -1.662351 | 1.382210  |
| H | 0.009851  | -2.584019 | 1.215833  |
| O | 1.375730  | 1.204138  | -0.773850 |
| H | 1.594591  | 2.126580  | -0.539329 |
| H | 2.033765  | 0.257067  | 0.114132  |
| H | 2.549073  | 0.180740  | 1.674940  |
| O | 2.556854  | 1.439959  | 2.775768  |
| H | 1.639257  | 1.692000  | 3.009398  |
| H | 3.058407  | 1.337563  | 3.596862  |
| O | -0.036383 | 2.496948  | 2.415628  |
| H | -0.578477 | 2.983248  | 3.052894  |
| H | -0.950990 | 1.293268  | 1.267998  |
| O | 1.956094  | 3.567524  | 0.762440  |
| H | 0.422868  | 3.158935  | 1.857734  |
| H | 2.681805  | 3.253078  | 1.327848  |
| H | 2.212347  | 4.441180  | 0.433517  |

E = -535.503712229  
G = -535.356625  
E +  $\Delta G_{\text{solv}}$  = -535.563069

### 6H<sub>2</sub>O-B3LYP

|   |           |           |           |
|---|-----------|-----------|-----------|
| O | -0.664418 | 1.092432  | 0.627335  |
| H | -0.035488 | 0.899801  | -0.130878 |
| H | -0.468290 | -0.317231 | 1.833985  |

|   |           |           |           |
|---|-----------|-----------|-----------|
| H | -1.528183 | 1.263563  | 0.233117  |
| O | 3.213965  | -0.374012 | 0.035423  |
| H | 3.528612  | -1.282856 | -0.031064 |
| O | -0.097167 | -0.973650 | 2.459588  |
| H | -0.737478 | -1.083791 | 3.171631  |
| O | 1.094364  | 0.559037  | -1.274132 |
| H | 1.428075  | 1.303783  | -1.788942 |
| H | 1.894188  | 0.146997  | -0.842926 |
| H | 3.025186  | -0.198672 | 0.999544  |
| O | 2.476484  | 0.176702  | 2.547022  |
| H | 2.186610  | 1.110259  | 2.553877  |
| H | 1.651532  | -0.330575 | 2.687955  |
| O | 1.105939  | 2.646708  | 2.185753  |
| H | 0.739464  | 3.233477  | 2.856981  |
| H | 0.353414  | 2.277419  | 1.681108  |

E = -458.680465003  
G = -458.571194  
E +  $\Delta G_{\text{solv}}$  = -458.682190

### CH<sub>3</sub>CN-B3LYP

|   |           |          |           |
|---|-----------|----------|-----------|
| C | -1.642132 | 1.099995 | -0.020948 |
| N | -0.481021 | 1.100009 | -0.020949 |
| C | -3.103864 | 1.099991 | -0.020937 |
| H | -3.480708 | 2.111643 | -0.197480 |
| H | -3.480715 | 0.441291 | -0.808785 |
| H | -3.480738 | 0.747071 | 0.943438  |

E = -132.762593588  
G = -132.741371  
E +  $\Delta G_{\text{solv}}$  = -132.764232

### cis-stilbene-B3LYP

|   |           |           |           |
|---|-----------|-----------|-----------|
| C | 3.293278  | 1.508159  | -1.096767 |
| C | 4.565880  | 1.073922  | -0.725928 |
| C | 4.863392  | 0.815105  | 0.616816  |
| C | 3.878015  | 1.009266  | 1.588815  |
| C | 2.607443  | 1.453376  | 1.217809  |
| C | 2.284341  | 1.691335  | -0.131742 |
| H | 3.079945  | 1.718672  | -2.139394 |
| H | 5.330905  | 0.944928  | -1.486703 |
| H | 5.855489  | 0.477160  | 0.902314  |
| H | 4.099786  | 0.822558  | 2.635933  |
| H | 1.848410  | 1.611396  | 1.980280  |
| C | 0.936973  | 2.196477  | -0.465064 |
| H | 0.515224  | 2.855710  | 0.293584  |
| C | 0.164583  | 1.990318  | -1.554249 |
| H | -0.759524 | 2.566981  | -1.592597 |
| C | 0.351857  | 1.087760  | -2.708512 |
| C | 0.924449  | -0.193312 | -2.592212 |
| C | -0.130344 | 1.485839  | -3.969917 |
| C | 1.037096  | -1.028833 | -3.703471 |
| H | 1.271182  | -0.537315 | -1.623513 |
| C | -0.009146 | 0.654223  | -5.084812 |
| H | -0.596787 | 2.462486  | -4.074995 |
| C | 0.578387  | -0.607502 | -4.956682 |
| H | 1.476829  | -2.015927 | -3.589463 |
| H | -0.379534 | 0.988501  | -6.049988 |
| H | 0.667879  | -1.260470 | -5.820157 |

E = -540.730446613  
G = -540.554150  
E +  $\Delta G_{\text{solv}}$  = -540.723266

### Benzophenone-B3LYP

|   |           |          |          |
|---|-----------|----------|----------|
| C | -1.096244 | 1.118413 | 0.229627 |
|---|-----------|----------|----------|

|   |           |           |           |
|---|-----------|-----------|-----------|
| C | -1.919878 | 0.222749  | 0.917756  |
| C | -1.364763 | -0.856723 | 1.609561  |
| C | 0.023028  | -1.033730 | 1.617296  |
| C | 0.846142  | -0.136723 | 0.934770  |
| C | 0.292637  | 0.940780  | 0.225951  |
| H | -1.522168 | 1.964679  | -0.298176 |
| H | -2.996085 | 0.371813  | 0.915259  |
| H | -2.006204 | -1.552074 | 2.143419  |
| H | 0.463429  | -1.867428 | 2.156992  |
| H | 1.925015  | -0.274648 | 0.949795  |
| C | 1.206550  | 1.886917  | -0.481027 |
| C | 1.407076  | 1.931366  | -1.960975 |
| C | 0.724578  | 1.033479  | -2.939416 |
| C | 1.473803  | 0.031186  | -3.575054 |
| C | -0.630159 | 1.180121  | -3.262096 |
| C | 0.873645  | -0.824351 | -4.500173 |
| H | 2.530578  | -0.080363 | -3.342543 |
| C | -1.229503 | 0.326461  | -4.192654 |
| H | -1.203464 | 1.970527  | -2.790497 |
| C | -0.482733 | -0.679681 | -4.810858 |
| H | 1.463754  | -1.599753 | -4.980571 |
| H | -2.280852 | 0.451196  | -4.436687 |
| H | -0.950565 | -1.342075 | -5.533580 |
| O | 0.633649  | 2.928448  | -1.281287 |
| H | 2.385459  | 2.290550  | -2.289655 |
| H | 2.059462  | 2.218186  | 0.116764  |

E = -615.931503868

G = -615.751802

E +  $\Delta G_{\text{solv}}$  = -615.926701

### 1-OPBE

|    |           |           |           |
|----|-----------|-----------|-----------|
| C  | 0.495800  | 0.904426  | 0.228000  |
| C  | 0.392649  | 0.868655  | 2.866808  |
| C  | 1.044191  | 1.383623  | 1.577669  |
| H  | 0.595897  | -0.182694 | 0.119154  |
| H  | 1.091865  | 1.376584  | -0.567802 |
| H  | 0.921071  | 1.321465  | 3.720366  |
| H  | 0.490771  | -0.220456 | 2.956558  |
| H  | 1.037965  | 2.484988  | 1.591362  |
| H  | 2.106480  | 1.104160  | 1.616128  |
| C  | -4.477221 | 0.864765  | 0.034000  |
| C  | -4.580646 | 0.826029  | 2.655986  |
| C  | -5.282959 | 0.599372  | 1.311568  |
| H  | -5.157410 | 0.808616  | -0.832776 |
| H  | -4.065903 | 1.883686  | 0.048984  |
| H  | -5.326281 | 0.744121  | 3.464789  |
| H  | -4.170034 | 1.844451  | 2.704873  |
| H  | -6.151394 | 1.272922  | 1.286724  |
| H  | -5.702910 | -0.417703 | 1.280696  |
| Ni | -2.085457 | 0.216949  | 1.433928  |
| N  | -0.931883 | 1.268186  | 0.069787  |
| N  | -1.046608 | 1.221320  | 2.923803  |
| N  | -3.486642 | -0.145875 | 2.880947  |
| N  | -3.365168 | -0.097595 | -0.137035 |
| H  | -3.891204 | -1.084412 | 2.821037  |
| H  | -3.763680 | -1.039968 | -0.142445 |
| H  | -1.106787 | 2.213809  | 2.689454  |
| H  | -1.009560 | 2.251333  | 0.337739  |
| C  | -2.776264 | -0.075301 | 4.176060  |
| C  | -1.754608 | 1.063311  | 4.219778  |
| C  | -2.552711 | 0.023538  | -1.367051 |
| C  | -1.536401 | 1.164242  | -1.282454 |
| H  | -3.186218 | 0.159085  | -2.258381 |
| H  | -2.037264 | -0.937086 | -1.486432 |
| H  | -0.765331 | 1.024670  | -2.052161 |
| H  | -2.017849 | 2.124478  | -1.504131 |

|   |           |           |           |
|---|-----------|-----------|-----------|
| H | -2.248223 | 2.015921  | 4.446112  |
| H | -1.045586 | 0.886441  | 5.039687  |
| H | -2.272709 | -1.042058 | 4.298879  |
| H | -3.480068 | 0.027425  | 5.017744  |
| N | -4.936054 | -3.060431 | 3.492870  |
| C | -5.639553 | -3.849629 | 3.998131  |
| C | -6.512520 | -4.824592 | 4.625874  |
| H | -6.249893 | -5.837467 | 4.296580  |
| H | -6.414429 | -4.772033 | 5.717269  |
| H | -7.556973 | -4.624990 | 4.355977  |
| N | -4.547931 | -3.084191 | -1.089486 |
| C | -5.126026 | -3.856526 | -1.754844 |
| C | -5.842952 | -4.810686 | -2.581045 |
| H | -6.144201 | -4.340516 | -3.525382 |
| H | -5.204102 | -5.673636 | -2.806047 |
| H | -6.741946 | -5.162350 | -2.060016 |
| N | 0.232125  | 4.282633  | 5.085016  |
| N | 0.988581  | 4.279347  | -1.770141 |
| C | 0.690582  | 4.969060  | 5.917555  |
| C | 1.659958  | 4.938730  | -2.469422 |
| C | 1.259486  | 5.817652  | 6.950188  |
| H | 2.073679  | 6.425088  | 6.536138  |
| H | 0.491623  | 6.486866  | 7.357558  |
| H | 1.659444  | 5.203996  | 7.766816  |
| C | 2.492506  | 5.753535  | -3.337243 |
| H | 3.271380  | 5.136908  | -3.802595 |
| H | 1.884343  | 6.208312  | -4.128856 |
| H | 2.975054  | 6.551975  | -2.760197 |
| N | -1.357580 | -1.604893 | 1.437222  |
| N | -2.140173 | 4.146479  | 1.395942  |
| C | -2.143607 | 5.318078  | 1.394670  |
| C | -1.076643 | -2.738968 | 1.428991  |
| C | -2.144780 | 6.767850  | 1.393793  |
| H | -1.746593 | 7.142326  | 2.344921  |
| H | -1.518225 | 7.140986  | 0.574207  |
| H | -3.165729 | 7.146805  | 1.261621  |
| C | -0.734712 | -4.144124 | 1.414787  |
| H | -0.718725 | -4.537402 | 2.439309  |
| H | -1.481946 | -4.698077 | 0.832048  |
| H | 0.254235  | -4.289777 | 0.961608  |

E = -2918.81663623

G = -2918.293139

E +  $\Delta G_{\text{solv}}$  = -2918.912773

### 2-OPBE

|    |           |           |           |
|----|-----------|-----------|-----------|
| C  | 0.620369  | 0.539972  | 0.327839  |
| C  | 0.408572  | 0.549568  | 2.943753  |
| C  | 1.245884  | 0.837674  | 1.693976  |
| H  | 0.433303  | -0.525978 | 0.172318  |
| H  | 1.328739  | 0.870148  | -0.447877 |
| H  | 0.982186  | 0.886460  | 3.821223  |
| H  | 0.199337  | -0.515517 | 3.074633  |
| H  | 1.570427  | 1.888180  | 1.716126  |
| H  | 2.167995  | 0.245269  | 1.770284  |
| C  | -4.468736 | 0.957850  | -0.087455 |
| C  | -4.680478 | 0.967550  | 2.528478  |
| C  | -5.306247 | 0.670361  | 1.162336  |
| H  | -5.042491 | 0.621227  | -0.964941 |
| H  | -4.258864 | 2.022801  | -0.218391 |
| H  | -5.389005 | 0.637723  | 3.304204  |
| H  | -4.492762 | 2.033372  | 2.684080  |
| H  | -6.227903 | 1.263478  | 1.086058  |
| H  | -5.631528 | -0.379912 | 1.140195  |
| Ni | -2.030191 | 0.753258  | 1.428161  |
| N  | -0.642511 | 1.295118  | 0.137556  |
| N  | -0.867789 | 1.304752  | 2.920519  |

|   |           |           |           |
|---|-----------|-----------|-----------|
| N | -3.418052 | 0.211607  | 2.718589  |
| N | -3.192800 | 0.201941  | -0.064052 |
| H | -3.665357 | -0.776371 | 2.562757  |
| H | -3.461067 | -0.783582 | 0.062297  |
| H | -0.600006 | 2.290441  | 2.794465  |
| H | -0.395810 | 2.283243  | 0.293165  |
| C | -2.777439 | 0.227752  | 4.071676  |
| C | -1.716216 | 1.299779  | 4.153293  |
| C | -2.344312 | 0.206262  | -1.296751 |
| C | -1.283038 | 1.278293  | -1.215590 |
| H | -2.969658 | 0.344705  | -2.189530 |
| H | -1.897645 | -0.790870 | -1.371763 |
| H | -0.522978 | 1.135175  | -1.996058 |
| H | -1.713745 | 2.273851  | -1.366978 |
| H | -2.162903 | 2.296858  | 4.228840  |
| H | -1.090826 | 1.160938  | 5.045972  |
| H | -2.346696 | -0.767877 | 4.222509  |
| H | -3.537454 | 0.370431  | 4.852275  |
| N | -4.680027 | -2.587701 | 3.372581  |
| C | -5.365806 | -3.372360 | 3.910194  |
| C | -6.213542 | -4.341248 | 4.576926  |
| H | -6.421879 | -5.186963 | 3.909597  |
| H | -5.719422 | -4.717478 | 5.481708  |
| H | -7.165358 | -3.875988 | 4.863333  |
| N | -4.334285 | -2.617048 | -0.957484 |
| C | -4.917580 | -3.380187 | -1.630351 |
| C | -5.638464 | -4.321898 | -2.464498 |
| H | -5.117082 | -4.456549 | -3.420742 |
| H | -5.713019 | -5.295064 | -1.963092 |
| H | -6.651544 | -3.950366 | -2.664573 |
| N | 0.271446  | 4.123280  | 3.816262  |
| N | 0.618785  | 4.094855  | -0.520012 |
| C | 0.852572  | 4.886988  | 4.490357  |
| C | 1.303207  | 4.878705  | -1.060538 |
| C | 1.570282  | 5.829987  | 5.325745  |
| H | 2.011448  | 6.624030  | 4.710227  |
| H | 0.888531  | 6.284941  | 6.055526  |
| H | 2.374933  | 5.317332  | 5.868105  |
| C | 2.149269  | 5.846557  | -1.730908 |
| H | 3.102822  | 5.382512  | -2.013485 |
| H | 1.655485  | 6.216810  | -2.638334 |
| H | 2.354202  | 6.696268  | -1.067610 |
| N | -1.464970 | -1.410647 | 1.477510  |
| N | -2.594935 | 2.918158  | 1.378713  |
| C | -2.714387 | 4.082368  | 1.369542  |
| C | -1.344478 | -2.574739 | 1.486465  |
| C | -2.877665 | 5.517454  | 1.360368  |
| H | -2.042299 | 5.984125  | 1.898068  |
| H | -2.890436 | 5.886734  | 0.326499  |
| H | -3.821227 | 5.793595  | 1.849802  |
| C | -1.179860 | -4.009671 | 1.495319  |
| H | -1.172571 | -4.379824 | 2.528927  |
| H | -2.011730 | -4.476647 | 0.952501  |
| H | -0.233312 | -4.284495 | 1.010930  |

E = -2918.40913955

G =

E +  $\Delta G_{\text{solv}}$  = -2918.711106

### 3-OPBE-doublet

|   |          |           |           |
|---|----------|-----------|-----------|
| C | 0.637698 | 0.482870  | 0.377954  |
| C | 0.398790 | 0.522564  | 2.958125  |
| C | 1.295898 | 0.722694  | 1.736671  |
| H | 0.277993 | -0.550011 | 0.290512  |
| H | 1.384349 | 0.644249  | -0.415905 |
| H | 0.985187 | 0.716987  | 3.869995  |

|    |           |           |           |
|----|-----------|-----------|-----------|
| H  | 0.031969  | -0.510177 | 3.013705  |
| H  | 1.736351  | 1.730127  | 1.762450  |
| H  | 2.139531  | 0.024847  | 1.825581  |
| C  | -4.275520 | 0.825112  | -0.082430 |
| C  | -4.510604 | 0.842385  | 2.500055  |
| C  | -5.097990 | 0.447338  | 1.147242  |
| H  | -4.790411 | 0.458043  | -0.981976 |
| H  | -4.135966 | 1.909329  | -0.154227 |
| H  | -5.180338 | 0.487676  | 3.296898  |
| H  | -4.386208 | 1.927783  | 2.581221  |
| H  | -6.075541 | 0.939887  | 1.055191  |
| H  | -5.307758 | -0.633972 | 1.135010  |
| Ni | -1.886610 | 0.982641  | 1.434728  |
| N  | -0.497701 | 1.412780  | 0.160564  |
| N  | -0.759902 | 1.449714  | 2.931137  |
| N  | -3.177946 | 0.217141  | 2.699046  |
| N  | -2.930543 | 0.197932  | -0.026893 |
| H  | -3.283353 | -0.782253 | 2.501734  |
| H  | -3.071408 | -0.796859 | 0.171356  |
| H  | -0.385921 | 2.405527  | 2.854625  |
| H  | -0.141239 | 2.371005  | 0.283598  |
| C  | -2.597788 | 0.302540  | 4.071743  |
| C  | -1.639224 | 1.467228  | 4.132029  |
| C  | -2.110715 | 0.249827  | -1.273363 |
| C  | -1.138746 | 1.401916  | -1.183137 |
| H  | -2.756276 | 0.345228  | -2.155991 |
| H  | -1.590982 | -0.711446 | -1.359508 |
| H  | -0.376825 | 1.350785  | -1.974678 |
| H  | -1.661224 | 2.359864  | -1.276642 |
| H  | -2.180916 | 2.418348  | 4.095906  |
| H  | -1.037779 | 1.451001  | 5.052511  |
| H  | -2.091933 | -0.649393 | 4.270377  |
| H  | -3.393142 | 0.404318  | 4.821254  |
| N  | -4.883335 | -2.602177 | 4.115611  |
| C  | -5.567221 | -3.306542 | 4.756212  |
| C  | -6.415306 | -4.176331 | 5.551628  |
| H  | -6.864219 | -4.951396 | 4.918293  |
| H  | -5.827177 | -4.661252 | 6.340561  |
| H  | -7.219689 | -3.595221 | 6.019373  |
| N  | -4.525229 | -2.597673 | -1.722160 |
| C  | -5.157932 | -3.260688 | -2.453203 |
| C  | -5.942845 | -4.079084 | -3.360258 |
| H  | -5.297495 | -4.514114 | -4.133385 |
| H  | -6.432713 | -4.892076 | -2.810347 |
| H  | -6.714123 | -3.469893 | -3.847644 |
| N  | 0.433119  | 4.247677  | 3.706239  |
| N  | 0.719934  | 4.249392  | -0.350823 |
| C  | 0.827759  | 5.187453  | 4.283026  |
| C  | 1.163085  | 5.219295  | -0.834897 |
| C  | 1.315636  | 6.350896  | 4.998959  |
| H  | 2.358175  | 6.554085  | 4.724502  |
| H  | 0.705336  | 7.228747  | 4.753074  |
| H  | 1.263489  | 6.176936  | 6.080928  |
| C  | 1.710689  | 6.420426  | -1.435905 |
| H  | 2.746395  | 6.569544  | -1.106394 |
| H  | 1.697350  | 6.334321  | -2.529545 |
| H  | 1.114834  | 7.293962  | -1.143592 |
| N  | -1.605203 | -2.692733 | 1.416524  |
| C  | -1.542125 | -3.862871 | 1.400642  |
| C  | -1.466291 | -5.310960 | 1.380244  |
| H  | -1.953380 | -5.725101 | 2.271666  |
| H  | -1.970809 | -5.699790 | 0.487060  |
| H  | -0.418689 | -5.636356 | 1.365479  |
| O  | -2.672399 | 2.785117  | 1.345565  |
| H  | -2.025015 | 3.504053  | 1.378235  |

E = -2861.86954194

G = -2861.367376  
E +  $\Delta G_{\text{solv}}$  = -2861.978927

### 3-OPBE-quartet

|    |           |           |           |
|----|-----------|-----------|-----------|
| C  | 0.815726  | 0.132880  | 0.787499  |
| C  | 0.318975  | 0.443390  | 3.331450  |
| C  | 1.338505  | 0.457391  | 2.188943  |
| H  | 0.325992  | -0.849602 | 0.783885  |
| H  | 1.670947  | 0.063837  | 0.094566  |
| H  | 0.851790  | 0.570352  | 4.288483  |
| H  | -0.201779 | -0.522988 | 3.380092  |
| H  | 1.868561  | 1.421659  | 2.181069  |
| H  | 2.104642  | -0.294297 | 2.425449  |
| C  | -4.036635 | 0.284679  | -0.090642 |
| C  | -4.539886 | 0.794205  | 2.436851  |
| C  | -4.918981 | 0.070644  | 1.141933  |
| H  | -4.442997 | -0.318684 | -0.916293 |
| H  | -4.043075 | 1.335266  | -0.404914 |
| H  | -5.282614 | 0.538222  | 3.208148  |
| H  | -4.543975 | 1.883505  | 2.307351  |
| H  | -5.932213 | 0.394891  | 0.866752  |
| H  | -5.005238 | -1.008123 | 1.346935  |
| Ni | -1.811417 | 1.192748  | 1.511568  |
| N  | -0.147204 | 1.137928  | 0.280038  |
| N  | -0.673530 | 1.527106  | 3.178863  |
| N  | -3.190571 | 0.370703  | 2.884790  |
| N  | -2.623824 | -0.126294 | 0.140376  |
| H  | -3.179537 | -0.647992 | 2.820467  |
| H  | -2.628742 | -1.056794 | 0.573529  |
| H  | -0.154813 | 2.409418  | 3.074722  |
| H  | 0.304466  | 2.053751  | 0.272823  |
| C  | -2.767413 | 0.704952  | 4.266818  |
| C  | -1.646633 | 1.744033  | 4.272653  |
| C  | -1.747269 | -0.217199 | -1.053788 |
| C  | -0.695447 | 0.893202  | -1.072358 |
| H  | -2.341321 | -0.178175 | -1.975036 |
| H  | -1.269590 | -1.204114 | -1.037143 |
| H  | 0.101193  | 0.634086  | -1.787978 |
| H  | -1.140194 | 1.838742  | -1.403833 |
| H  | -2.056946 | 2.748592  | 4.113227  |
| H  | -1.141285 | 1.745896  | 5.251250  |
| H  | -2.441585 | -0.223932 | 4.749841  |
| H  | -3.612598 | 1.081559  | 4.857973  |
| N  | -4.809797 | -2.427621 | 4.728930  |
| C  | -5.510079 | -3.002076 | 5.473289  |
| C  | -6.378774 | -3.711158 | 6.396096  |
| H  | -7.075089 | -4.354162 | 5.843816  |
| H  | -5.783572 | -4.335120 | 7.074142  |
| H  | -6.958895 | -2.997248 | 6.993705  |
| N  | -4.293477 | -2.176180 | -3.128288 |
| C  | -4.772226 | -2.710423 | -4.055377 |
| C  | -5.365136 | -3.371760 | -5.204400 |
| H  | -4.584940 | -3.842015 | -5.815565 |
| H  | -6.069390 | -4.145708 | -4.874648 |
| H  | -5.905486 | -2.643977 | -5.822279 |
| N  | 1.028624  | 4.144195  | 3.562872  |
| N  | -0.552087 | 4.695295  | -0.349656 |
| C  | 1.610310  | 5.038098  | 4.047201  |
| C  | -0.349543 | 5.711898  | -0.895070 |

|   |           |           |           |
|---|-----------|-----------|-----------|
| C | 2.329997  | 6.144560  | 4.649091  |
| H | 3.144981  | 6.468703  | 3.990488  |
| H | 1.651251  | 6.989883  | 4.816825  |
| H | 2.756009  | 5.837332  | 5.612232  |
| C | -0.099183 | 6.969562  | -1.571291 |
| H | 0.970085  | 7.212179  | -1.535647 |
| H | -0.412679 | 6.902521  | -2.620638 |
| H | -0.663093 | 7.775375  | -1.084583 |
| N | -2.104986 | -2.951907 | 1.483012  |
| C | -2.162437 | -4.114509 | 1.614878  |
| C | -2.235755 | -5.552868 | 1.779717  |
| H | -3.079577 | -5.811555 | 2.431258  |
| H | -2.378210 | -6.035994 | 0.805014  |
| H | -1.309724 | -5.930254 | 2.230652  |
| O | -2.391010 | 2.846017  | 1.134008  |
| H | -1.757733 | 3.476692  | 0.725990  |

E = -2861.84672411

### 4-OPBE-singlet

|    |           |           |           |
|----|-----------|-----------|-----------|
| C  | 0.822253  | 0.217008  | 0.319916  |
| C  | 0.556763  | 0.343959  | 2.927924  |
| C  | 1.428696  | 0.550454  | 1.685973  |
| H  | 0.618754  | -0.849608 | 0.188956  |
| H  | 1.554049  | 0.503632  | -0.453232 |
| H  | 1.122492  | 0.7111759 | 3.798767  |
| H  | 0.311778  | -0.704901 | 3.116035  |
| H  | 1.786029  | 1.590203  | 1.676593  |
| H  | 2.330353  | -0.065978 | 1.805442  |
| C  | -4.242970 | 1.022071  | -0.220239 |
| C  | -4.497283 | 1.156881  | 2.375435  |
| C  | -5.131632 | 0.861698  | 1.014770  |
| H  | -4.828342 | 0.727805  | -1.106895 |
| H  | -3.904302 | 2.052456  | -0.358244 |
| H  | -5.246318 | 0.950984  | 3.157947  |
| H  | -4.183396 | 2.200204  | 2.475288  |
| H  | -5.980987 | 1.548098  | 0.895896  |
| H  | -5.566185 | -0.148708 | 1.024106  |
| Ni | -1.848999 | 0.590253  | 1.354757  |
| N  | -0.414056 | 0.995854  | 0.064532  |
| N  | -0.685342 | 1.147049  | 2.845350  |
| N  | -3.347154 | 0.265611  | 2.639372  |
| N  | -3.071682 | 0.120178  | -0.159071 |
| H  | -3.693476 | -0.701048 | 2.520699  |
| H  | -3.444558 | -0.829844 | -0.006214 |
| H  | -0.378136 | 2.117920  | 2.674591  |
| H  | -0.164097 | 1.993798  | 0.195434  |
| C  | -2.719287 | 0.289607  | 3.992558  |
| C  | -1.566856 | 1.265610  | 4.048102  |
| C  | -2.196719 | -0.004674 | -1.360276 |
| C  | -1.027166 | 0.953275  | -1.300750 |
| H  | -2.783577 | 0.175704  | -2.271941 |
| H  | -1.860592 | -1.046307 | -1.398843 |
| H  | -0.267339 | 0.669877  | -2.042464 |
| H  | -1.342119 | 1.977699  | -1.528150 |
| H  | -1.924281 | 2.299806  | 4.061235  |
| H  | -0.974348 | 1.107036  | 4.959299  |
| H  | -2.394986 | -0.734234 | 4.208535  |
| H  | -3.471877 | 0.554364  | 4.748795  |
| N  | -4.697671 | -2.404942 | 3.293092  |
| C  | -5.467976 | -3.100721 | 3.838663  |
| C  | -6.419180 | -3.959867 | 4.514456  |
| H  | -6.519979 | -4.911791 | 3.977869  |
| H  | -6.082546 | -4.164934 | 5.538802  |

|   |           |           |           |
|---|-----------|-----------|-----------|
| H | -7.402199 | -3.473389 | 4.557240  |
| N | -4.283297 | -2.642382 | -0.872179 |
| C | -4.912738 | -3.384185 | -1.527256 |
| C | -5.688730 | -4.300681 | -2.338435 |
| H | -5.049750 | -4.766971 | -3.099306 |
| H | -6.124897 | -5.088203 | -1.710908 |
| H | -6.501260 | -3.762103 | -2.842900 |
| N | 0.574216  | 3.795619  | 3.651971  |
| N | -0.080523 | 3.947226  | -0.118676 |
| C | 1.039049  | 4.664347  | 4.287006  |
| C | 0.261447  | 4.994139  | -0.519110 |
| C | 1.613131  | 5.737622  | 5.073653  |
| H | 2.622235  | 5.973922  | 4.712847  |
| H | 0.988731  | 6.637032  | 4.999404  |
| H | 1.677628  | 5.439824  | 6.128017  |
| C | 0.683207  | 6.285776  | -1.014296 |
| H | 1.756067  | 6.427506  | -0.830028 |
| H | 0.496399  | 6.355159  | -2.093839 |
| H | 0.125196  | 7.083089  | -0.506257 |
| N | -1.481498 | -1.320853 | 1.487978  |
| C | -1.403371 | -2.484191 | 1.557063  |
| C | -1.287681 | -3.918394 | 1.640729  |
| H | -1.333416 | -4.236563 | 2.691124  |
| H | -2.116547 | -4.380886 | 1.088309  |
| H | -0.333599 | -4.247719 | 1.206438  |
| O | -2.348991 | 2.332899  | 1.275391  |
| H | -1.644584 | 2.919521  | 0.937670  |

E = -2861.43491722

G = -2860.914991

E +  $\Delta G_{\text{solv}}$  = -2861.757796

#### 4-OPBE-triplet

|    |           |           |           |
|----|-----------|-----------|-----------|
| C  | 0.820139  | 0.028493  | 0.705379  |
| C  | 0.285133  | 0.123220  | 3.232385  |
| C  | 1.346587  | 0.146624  | 2.133356  |
| H  | 0.290771  | -0.919508 | 0.555443  |
| H  | 1.671785  | 0.049360  | 0.005805  |
| H  | 0.782479  | 0.231198  | 4.210725  |
| H  | -0.269241 | -0.822682 | 3.245085  |
| H  | 1.973152  | 1.043672  | 2.234804  |
| H  | 2.018939  | -0.705775 | 2.300870  |
| C  | -3.923858 | 0.850132  | -0.368379 |
| C  | -4.485133 | 1.068581  | 2.163726  |
| C  | -4.907330 | 0.606729  | 0.772413  |
| H  | -4.347257 | 0.400371  | -1.278862 |
| H  | -3.746735 | 1.915271  | -0.554425 |
| H  | -5.265830 | 0.759650  | 2.875769  |
| H  | -4.364275 | 2.154979  | 2.237374  |
| H  | -5.838138 | 1.132236  | 0.518090  |
| H  | -5.169701 | -0.460687 | 0.803653  |
| Ni | -1.710157 | 0.998381  | 1.439003  |
| N  | -0.094727 | 1.146638  | 0.340045  |
| N  | -0.655630 | 1.256996  | 3.081142  |
| N  | -3.223263 | 0.413902  | 2.583111  |
| N  | -2.614023 | 0.179773  | -0.127607 |
| H  | -3.357544 | -0.594572 | 2.429768  |
| H  | -2.830939 | -0.807195 | 0.072135  |
| H  | -0.083014 | 2.128457  | 3.007140  |
| H  | 0.381191  | 2.030646  | 0.542829  |
| C  | -2.820484 | 0.546849  | 4.024492  |
| C  | -1.657008 | 1.502186  | 4.155155  |
| C  | -1.648711 | 0.154583  | -1.276839 |
| C  | -0.564425 | 1.189559  | -1.075390 |
| H  | -2.183959 | 0.333843  | -2.217662 |
| H  | -1.240205 | -0.860132 | -1.329811 |

|   |           |           |           |
|---|-----------|-----------|-----------|
| H | 0.279534  | 1.015269  | -1.760006 |
| H | -0.935945 | 2.202776  | -1.261676 |
| H | -1.982678 | 2.542760  | 4.040036  |
| H | -1.176841 | 1.409419  | 5.140754  |
| H | -2.565976 | -0.458455 | 4.377266  |
| H | -3.672871 | 0.892491  | 4.621733  |
| N | -5.057335 | -2.056916 | 3.672225  |
| C | -5.837149 | -2.717063 | 4.249080  |
| C | -6.799860 | -3.529906 | 4.966269  |
| H | -7.405004 | -4.113015 | 4.260768  |
| H | -6.283334 | -4.219704 | 5.645126  |
| H | -7.469241 | -2.890737 | 5.555834  |
| N | -3.998513 | -2.399404 | -1.429409 |
| C | -4.550558 | -3.152201 | -2.139257 |
| C | -5.235764 | -4.079908 | -3.018330 |
| H | -4.726133 | -4.127494 | -3.989988 |
| H | -5.247122 | -5.084889 | -2.576280 |
| H | -6.271898 | -3.753275 | -3.178984 |
| N | 1.073186  | 3.612216  | 3.263187  |
| N | -1.198963 | 4.776353  | -0.009567 |
| C | 1.774667  | 4.425541  | 3.732129  |
| C | -1.156382 | 5.866109  | -0.435636 |
| C | 2.640084  | 5.429096  | 4.314205  |
| H | 3.184564  | 5.964032  | 3.525484  |
| H | 2.044956  | 6.150318  | 4.888998  |
| H | 3.366912  | 4.954212  | 4.986002  |
| C | -1.095436 | 7.207963  | -0.967534 |
| H | -0.052751 | 7.548196  | -1.016067 |
| H | -1.525054 | 7.231584  | -1.977661 |
| H | -1.665352 | 7.890508  | -0.323233 |
| N | -1.582639 | -2.554395 | 1.663207  |
| C | -1.539103 | -3.724228 | 1.737609  |
| C | -1.488312 | -5.168936 | 1.832155  |
| H | -2.502461 | -5.584157 | 1.772964  |
| H | -0.887436 | -5.582180 | 1.011695  |
| H | -1.037366 | -5.470987 | 2.786290  |
| O | -2.234112 | 2.757473  | 1.332292  |
| H | -1.720927 | 3.490208  | 0.822115  |

E = -2861.40966353

G = -2860.898557

E +  $\Delta G_{\text{solv}}$  = -2861.725919

#### tBuOOH-6H<sub>2</sub>O-OPBE

|   |           |           |           |
|---|-----------|-----------|-----------|
| O | -0.264827 | 0.308031  | -0.122845 |
| H | -0.324731 | 0.731136  | 0.768672  |
| O | -1.660101 | 0.088847  | -0.414621 |
| O | -0.264249 | 1.684687  | 2.316986  |
| H | -0.158100 | 2.641086  | 2.115310  |
| H | 0.435964  | 1.481477  | 2.945404  |
| H | 0.247102  | 6.834305  | 3.292859  |
| O | -0.689054 | 6.615169  | 3.444123  |
| H | -1.174970 | 7.417704  | 3.228066  |
| H | -0.518775 | 4.995654  | 2.144854  |
| O | 0.046947  | 4.396472  | 1.627145  |
| H | -0.247699 | 4.499878  | 0.693630  |
| H | 1.617466  | 5.586720  | 2.020697  |
| O | 2.037111  | 6.380022  | 2.403685  |
| H | 2.798120  | 6.053900  | 2.895022  |
| H | -1.896739 | 1.645238  | -1.654560 |
| O | -2.084646 | 2.466203  | -2.144087 |
| H | -3.043430 | 2.552947  | -2.114177 |
| H | -0.113974 | 4.949940  | -1.650716 |
| O | -0.796023 | 4.704771  | -1.016875 |
| H | -1.229394 | 3.914504  | -1.406262 |
| C | -1.936636 | -1.332111 | -0.512015 |
| C | -1.105629 | -1.962111 | -1.633248 |

|   |           |           |           |
|---|-----------|-----------|-----------|
| H | -1.358460 | -3.023958 | -1.747719 |
| H | -1.294671 | -1.457852 | -2.589026 |
| H | -0.036344 | -1.886198 | -1.408999 |
| C | -1.682920 | -2.015052 | 0.834362  |
| H | -2.265108 | -1.533504 | 1.629642  |
| H | -1.970358 | -3.072918 | 0.786104  |
| H | -0.621309 | -1.964105 | 1.099942  |
| C | -3.429487 | -1.336981 | -0.857105 |
| H | -3.784681 | -2.370762 | -0.943805 |
| H | -4.015402 | -0.837984 | -0.075353 |
| H | -3.617214 | -0.834820 | -1.814282 |

E = -767.118233354

G = -766.891854

E +  $\Delta G_{\text{soln}}$  = -767.110221

### tBuOH-6H<sub>2</sub>O-OPBE

|   |           |           |           |
|---|-----------|-----------|-----------|
| O | -0.380557 | 0.907259  | -0.044785 |
| H | 0.490511  | 1.330274  | -0.316931 |
| H | 0.018570  | -1.020835 | 0.567494  |
| H | -0.976459 | 1.080041  | -0.781675 |
| O | 3.892172  | 0.863639  | 0.996140  |
| H | 4.551036  | 0.244458  | 0.666249  |
| O | 0.455368  | -1.763541 | 1.022206  |
| O | 1.908778  | 2.132896  | -0.616776 |
| H | 1.836774  | 2.972810  | -0.126189 |
| H | 2.649921  | 1.666694  | -0.177843 |
| H | 3.381561  | 0.363282  | 1.669975  |
| O | 2.224597  | -0.459713 | 2.855548  |
| H | 1.674020  | 0.205972  | 3.283995  |
| H | 1.598253  | -0.978343 | 2.310808  |
| O | -0.461017 | 2.341586  | 2.451076  |
| H | -1.341443 | 2.596507  | 2.746082  |
| H | -0.601585 | 1.836235  | 1.624234  |
| O | 1.334430  | 4.319916  | 1.267594  |
| H | 0.732842  | 3.770627  | 1.804193  |
| H | 2.055377  | 4.556302  | 1.860688  |
| C | -0.464057 | -2.861947 | 1.141593  |
| C | 0.332885  | -3.989340 | 1.801547  |
| H | 0.698921  | -3.680881 | 2.788591  |
| H | -0.290005 | -4.882666 | 1.931028  |
| H | 1.199678  | -4.258471 | 1.185525  |
| C | -1.658672 | -2.456066 | 2.018942  |
| H | -2.214499 | -1.623946 | 1.566368  |
| H | -2.357675 | -3.292624 | 2.149109  |
| H | -1.318109 | -2.138272 | 3.012359  |
| C | -0.936220 | -3.283319 | -0.257794 |
| H | -0.076798 | -3.537405 | -0.890251 |
| H | -1.599045 | -4.156877 | -0.206948 |
| H | -1.492573 | -2.472921 | -0.748190 |

E = -692.027253328

G = -691.798672

E +  $\Delta G_{\text{soln}}$  = -692.017105

### tBuO<sup>•</sup>-6H<sub>2</sub>O-OPBE

|   |           |           |           |
|---|-----------|-----------|-----------|
| O | -0.908359 | 1.580671  | -0.035842 |
| H | -0.065191 | 1.912795  | -0.449483 |
| H | -1.610446 | 2.049468  | -0.499062 |
| O | 3.464315  | 1.006147  | 0.385988  |
| H | 3.980548  | 0.278352  | 0.025921  |
| O | 1.036188  | -2.665599 | 1.663985  |
| O | 1.447860  | 2.607140  | -0.913029 |
| H | 1.539470  | 3.370325  | -0.316487 |
| H | 2.168062  | 2.011885  | -0.626123 |
| H | 3.030810  | 0.644203  | 1.189230  |

|   |           |           |           |
|---|-----------|-----------|-----------|
| O | 2.037658  | 0.110870  | 2.674037  |
| H | 1.288856  | 0.725450  | 2.753011  |
| H | 1.636165  | -0.754138 | 2.506840  |
| O | -0.169434 | 2.167967  | 2.550555  |
| H | -0.902599 | 2.250027  | 3.169017  |
| H | -0.577477 | 1.961255  | 1.673655  |
| O | 1.445574  | 4.458179  | 1.461059  |
| H | 0.948182  | 3.811439  | 1.990184  |
| H | 2.304570  | 4.520517  | 1.892561  |
| C | -0.117543 | -3.306003 | 1.321928  |
| C | -0.126123 | -4.525650 | 2.317523  |
| H | -0.149876 | -4.172416 | 3.353550  |
| H | -1.032430 | -5.107249 | 2.107033  |
| H | 0.759080  | -5.150762 | 2.164005  |
| C | -1.369098 | -2.438521 | 1.557157  |
| H | -1.333924 | -1.551879 | 0.912775  |
| H | -2.287821 | -2.993972 | 1.329168  |
| H | -1.414689 | -2.103554 | 2.600461  |
| C | -0.044171 | -3.840888 | -0.125119 |
| H | 0.847151  | -4.463934 | -0.260238 |
| H | -0.935093 | -4.432058 | -0.371675 |
| H | 0.014797  | -2.997341 | -0.823788 |

E = -691.349487358

G = -691.137354

E +  $\Delta G_{\text{soln}}$  = -691.339864

### CH<sub>3</sub>CN-OPBE

|   |           |          |           |
|---|-----------|----------|-----------|
| C | -1.647814 | 1.100008 | -0.020932 |
| N | -0.475984 | 1.099996 | -0.020979 |
| C | -3.101857 | 1.099997 | -0.020916 |
| H | -3.481164 | 2.114173 | -0.197928 |
| H | -3.481137 | 0.439645 | -0.810749 |
| H | -3.481222 | 0.746181 | 0.945844  |

E = -132.703196577

G = -132.682621

E +  $\Delta G_{\text{soln}}$  = -132.704546

### 6H<sub>2</sub>O-OPBE

|   |           |           |           |
|---|-----------|-----------|-----------|
| O | -0.738296 | 1.107760  | 0.572109  |
| H | -0.106768 | 0.910569  | -0.169352 |
| H | -0.512277 | -0.410338 | 1.856333  |
| H | -1.590144 | 1.245993  | 0.145126  |
| O | 3.276332  | -0.371869 | 0.015599  |
| H | 3.527395  | -1.299250 | -0.045446 |
| O | -0.147606 | -1.065284 | 2.479066  |
| H | -0.780353 | -1.111470 | 3.202859  |
| O | 1.088169  | 0.530620  | -1.364231 |
| H | 1.433716  | 1.285370  | -1.852867 |
| H | 1.880162  | 0.150470  | -0.907295 |
| H | 3.088963  | -0.214966 | 0.974625  |
| O | 2.549119  | 0.131066  | 2.631606  |
| H | 2.274454  | 1.062526  | 2.651713  |
| H | 1.711556  | -0.353510 | 2.741602  |
| O | 1.118706  | 2.782630  | 2.240586  |
| H | 0.715984  | 3.349071  | 2.906369  |
| H | 0.377699  | 2.420004  | 1.726974  |

E = -458.430321304

G = -458.324508

E +  $\Delta G_{\text{soln}}$  = -458.429634

### H<sub>2</sub>O-6H<sub>2</sub>O-OPBE

|   |           |          |          |
|---|-----------|----------|----------|
| O | -0.749662 | 0.790097 | 0.691191 |
|---|-----------|----------|----------|



|   |           |           |           |
|---|-----------|-----------|-----------|
| H | 0.125493  | 1.027084  | 0.242812  |
| H | -0.413092 | -0.451789 | 2.034605  |
| H | -1.305822 | 0.434635  | -0.010720 |
| O | 3.649819  | -0.010845 | 0.628402  |
| H | 4.100972  | -0.557924 | -0.022917 |
| O | -0.196955 | -1.093965 | 2.744033  |
| H | -0.546397 | -0.697353 | 3.548792  |
| O | 1.514510  | 1.524706  | -0.406157 |
| H | 1.647099  | 2.446219  | -0.113512 |
| H | 2.285535  | 1.020361  | -0.069654 |
| H | 3.300128  | -0.644380 | 1.292324  |
| O | 2.545249  | -1.791268 | 2.503866  |
| H | 2.933370  | -1.793627 | 3.384656  |
| H | 1.596401  | -1.583742 | 2.640809  |
| O | -1.122699 | 3.385710  | 1.908235  |
| H | -1.922724 | 3.837767  | 1.620518  |
| H | -1.165037 | 2.499460  | 1.497544  |
| O | 1.367967  | 4.213341  | 0.710325  |
| H | 0.529442  | 4.069548  | 1.191342  |
| H | 1.992593  | 4.516314  | 1.377259  |

E = -534.839401647

G = -534.713237

E +  $\Delta G_{\text{soln}}$  = -534.838387

### HOOH-6H<sub>2</sub>O-OPBE

|   |           |           |           |
|---|-----------|-----------|-----------|
| O | 0.064076  | 2.288563  | 0.711012  |
| H | 0.866082  | 2.020702  | 0.205405  |
| O | -1.003590 | 1.984027  | -0.201669 |
| H | -1.324559 | 1.078624  | 0.110091  |
| O | 2.297075  | 1.554799  | -0.930251 |
| H | 2.985487  | 2.217173  | -1.052773 |
| H | 1.829341  | 1.502476  | -1.781326 |
| H | -0.690866 | 2.086478  | 3.917099  |
| O | -0.200387 | 1.382636  | 3.479734  |
| H | -0.098510 | 1.689715  | 2.559347  |
| H | -1.709254 | -0.822817 | 1.218887  |
| O | -1.915568 | -0.442175 | 0.340878  |
| H | -1.516539 | -1.033128 | -0.320941 |
| H | -1.928641 | -1.492035 | 3.576902  |
| O | -1.221586 | -1.239065 | 2.974699  |
| H | -0.889266 | -0.381339 | 3.308331  |
| H | -0.432509 | 1.621619  | -1.913251 |
| O | 0.028568  | 1.259782  | -2.705344 |
| H | -0.353067 | 1.715917  | -3.462924 |
| H | 0.236867  | -2.128239 | -1.942382 |
| O | -0.583827 | -1.630974 | -2.024821 |
| H | -0.321336 | -0.777561 | -2.407722 |

E = -609.922745474

G = -609.793950

E +  $\Delta G_{\text{soln}}$  = -609.921061

### OH<sup>-</sup>-6H<sub>2</sub>O-OPBE

|   |           |           |           |
|---|-----------|-----------|-----------|
| O | -0.760844 | 0.794574  | 0.713085  |
| H | 0.116195  | 1.073767  | 0.303968  |
| H | -0.375958 | -0.408942 | 2.108208  |
| H | -1.261047 | 0.392631  | -0.005686 |
| O | 3.669735  | 0.124707  | 0.659036  |
| H | 4.149596  | -0.356796 | -0.022849 |
| O | -0.118757 | -1.015259 | 2.833338  |
| H | -0.343886 | -0.540069 | 3.640176  |
| O | 1.526537  | 1.642140  | -0.288994 |
| H | 1.645413  | 2.558150  | 0.008579  |
| H | 2.313186  | 1.145255  | 0.030122  |
| H | 3.329253  | -0.567097 | 1.267736  |

|   |           |           |          |
|---|-----------|-----------|----------|
| O | 2.560945  | -1.821455 | 2.348499 |
| H | 2.984692  | -2.015263 | 3.190680 |
| H | 1.637419  | -1.578490 | 2.572329 |
| O | -1.323297 | 3.350557  | 1.879905 |
| H | -2.187989 | 3.728371  | 1.689434 |
| H | -1.318313 | 2.464222  | 1.465928 |
| O | 1.076754  | 4.487968  | 0.881073 |
| H | 0.226431  | 4.199438  | 1.307331 |

E = -534.137442024

G = -534.025859

E +  $\Delta G_{\text{soln}}$  = -534.134554

### OH<sup>-</sup>-6H<sub>2</sub>O-OPBE

|   |           |           |           |
|---|-----------|-----------|-----------|
| O | -0.380279 | 0.633255  | 0.773997  |
| H | -0.487498 | 1.549043  | -0.502519 |
| H | 0.374616  | -0.700325 | 0.678675  |
| H | -1.269881 | 0.412359  | 1.073607  |
| O | 2.932009  | -1.616057 | 2.571342  |
| H | 2.209441  | -1.645242 | 1.901975  |
| O | 0.893852  | -1.592990 | 0.617023  |
| H | 1.277441  | -1.585029 | -0.265879 |
| O | -0.495095 | 2.175854  | -1.313484 |
| H | 0.898415  | 3.449909  | -0.651631 |
| H | -0.124269 | 1.641591  | -2.023220 |
| H | 3.189939  | -0.687724 | 2.575802  |
| O | 1.325744  | 0.701815  | 4.940723  |
| H | 1.143230  | 1.189644  | 4.109541  |
| H | 1.555825  | -0.181806 | 4.631278  |
| O | 0.788918  | 2.137882  | 2.494122  |
| H | 0.150802  | 2.833315  | 2.686001  |
| H | 0.297930  | 1.520684  | 1.822079  |
| O | 1.602084  | 3.946129  | -0.190365 |
| H | 1.662841  | 3.476108  | 0.652825  |

E = -534.290839522

G = -534.182497

E +  $\Delta G_{\text{soln}}$  = -534.341904

### H<sub>3</sub>O<sup>+</sup>-6H<sub>2</sub>O-OPBE

|   |           |           |           |
|---|-----------|-----------|-----------|
| O | -1.262167 | 1.997179  | 1.508886  |
| H | -0.085912 | 1.597665  | 0.615213  |
| H | 1.736154  | -3.300526 | -0.259837 |
| H | -2.150876 | 1.840104  | 1.170914  |
| O | 2.246730  | -0.204336 | 1.153625  |
| H | 2.279429  | -1.119926 | 0.797937  |
| O | 2.413434  | -2.814243 | 0.223993  |
| H | 3.254776  | -3.179871 | -0.072940 |
| O | 0.685078  | 1.263567  | 0.033053  |
| H | 1.155933  | 2.033419  | -0.377583 |
| H | 1.385257  | 0.589489  | 0.576883  |
| H | 2.185344  | -0.264078 | 2.133930  |
| O | 2.107248  | -0.235582 | 3.915480  |
| H | 1.554873  | -0.847981 | 4.415303  |
| H | 2.922942  | -0.155239 | 4.423863  |
| O | -1.195341 | 4.520392  | 2.712428  |
| H | -1.357852 | 4.622585  | 3.657356  |
| H | -1.273163 | 2.890264  | 1.915184  |
| O | 1.870591  | 3.385623  | -1.142844 |
| H | -1.474740 | 5.352254  | 2.313187  |
| H | 2.713326  | 3.759377  | -0.859587 |
| H | 1.868593  | 3.448227  | -2.105471 |

E = -535.225469727

G = -535.099010

E +  $\Delta G_{\text{soln}}$  = -535.278572



### cis-stilbene-OPBE

|   |           |           |           |
|---|-----------|-----------|-----------|
| C | 3.318523  | 1.553783  | -1.090235 |
| C | 4.594299  | 1.127541  | -0.715816 |
| C | 4.881947  | 0.837281  | 0.623604  |
| C | 3.882546  | 0.994221  | 1.590340  |
| C | 2.609160  | 1.431310  | 1.217692  |
| C | 2.293952  | 1.699447  | -0.131688 |
| H | 3.114514  | 1.792939  | -2.132554 |
| H | 5.372294  | 1.030057  | -1.474309 |
| H | 5.879463  | 0.504555  | 0.912494  |
| H | 4.096312  | 0.782560  | 2.638833  |
| H | 1.838602  | 1.557286  | 1.980238  |
| C | 0.948670  | 2.193535  | -0.468109 |
| H | 0.518610  | 2.855703  | 0.289337  |
| C | 0.169463  | 1.980675  | -1.560102 |
| H | -0.755716 | 2.563821  | -1.593353 |
| C | 0.345645  | 1.078081  | -2.709879 |
| C | 0.883040  | -0.220586 | -2.589238 |
| C | -0.111947 | 1.487726  | -3.980604 |
| C | 0.985227  | -1.059522 | -3.700655 |
| H | 1.206885  | -0.577420 | -1.612990 |
| C | 0.000480  | 0.652226  | -5.094454 |
| H | -0.550540 | 2.480575  | -4.094629 |
| C | 0.553199  | -0.626299 | -4.960316 |
| H | 1.396935  | -2.062611 | -3.580473 |
| H | -0.350480 | 0.998143  | -6.067583 |
| H | 0.634927  | -1.284214 | -5.826165 |

E = -540.500555740

G = -540.327375

E +  $\Delta G_{\text{solv}}$  = -540.493667

### Benzophenone-OPBE

|   |           |           |           |
|---|-----------|-----------|-----------|
| C | -1.112965 | 1.176784  | 0.331229  |
| C | -1.924496 | 0.282040  | 1.036806  |
| C | -1.367744 | -0.845866 | 1.647637  |
| C | 0.011049  | -1.071240 | 1.555901  |
| C | 0.823185  | -0.175651 | 0.856153  |
| C | 0.267403  | 0.951660  | 0.226109  |
| H | -1.545359 | 2.060709  | -0.134857 |
| H | -2.996147 | 0.471078  | 1.112511  |
| H | -2.001761 | -1.542899 | 2.196570  |
| H | 0.455613  | -1.946060 | 2.032037  |
| H | 1.897866  | -0.356710 | 0.794058  |
| C | 1.171664  | 1.900754  | -0.487945 |
| C | 1.379445  | 1.941409  | -1.964597 |
| C | 0.719606  | 1.034111  | -2.947922 |
| C | 1.489504  | 0.031626  | -3.563935 |
| C | -0.630385 | 1.167403  | -3.304719 |
| C | 0.915046  | -0.835458 | -4.496382 |
| H | 2.545794  | -0.073550 | -3.308957 |
| C | -1.203023 | 0.302360  | -4.242912 |
| H | -1.225192 | 1.957723  | -2.850913 |
| C | -0.436192 | -0.704149 | -4.838244 |
| H | 1.524356  | -1.612470 | -4.959667 |
| H | -2.253485 | 0.419714  | -4.512430 |
| H | -0.885156 | -1.377584 | -5.569042 |
| O | 0.609030  | 2.932102  | -1.291464 |
| H | 2.367522  | 2.299102  | -2.284160 |
| H | 2.031011  | 2.232387  | 0.111077  |

E = -615.675921028

G = -615.500244

E +  $\Delta G_{\text{solv}}$  = -615.670731

### 1-BLYP

|    |           |           |           |
|----|-----------|-----------|-----------|
| C  | 0.691566  | 0.519120  | 0.290306  |
| C  | 0.484789  | 0.542025  | 2.981666  |
| C  | 1.291123  | 0.868981  | 1.687148  |
| H  | 0.467280  | -0.553289 | 0.211603  |
| H  | 1.448711  | 0.762634  | -0.478511 |
| H  | 1.112707  | 0.808674  | 3.852391  |
| H  | 0.258246  | -0.531025 | 3.050146  |
| H  | 1.542691  | 1.945858  | 1.697213  |
| H  | 2.255348  | 0.338780  | 1.765708  |
| C  | -4.546073 | 0.965143  | -0.123219 |
| C  | -4.752791 | 0.988314  | 2.568151  |
| C  | -5.352632 | 0.638834  | 1.171330  |
| H  | -5.174058 | 0.698664  | -0.993949 |
| H  | -4.318965 | 2.038058  | -0.191860 |
| H  | -5.510033 | 0.745187  | 3.336997  |
| H  | -4.527876 | 2.060587  | 2.646875  |
| H  | -6.316477 | 1.169724  | 1.092759  |
| H  | -5.604933 | -0.437872 | 1.161360  |
| Ni | -2.030719 | 0.753171  | 1.429309  |
| N  | -0.568132 | 1.295730  | 0.032361  |
| N  | -0.803979 | 1.314020  | 3.026331  |
| N  | -3.493551 | 0.210915  | 2.825956  |
| N  | -3.257702 | 0.192465  | -0.167652 |
| H  | -3.739713 | -0.780896 | 2.695650  |
| H  | -3.518939 | -0.797954 | -0.060832 |
| H  | -0.543259 | 2.304599  | 2.919862  |
| H  | -0.322580 | 2.287692  | 0.162425  |
| C  | -2.843515 | 0.272525  | 4.186906  |
| C  | -1.654622 | 1.270410  | 4.272042  |
| C  | -2.406993 | 0.235432  | -1.413270 |
| C  | -1.218157 | 1.233452  | -1.328605 |
| H  | -3.015062 | 0.479698  | -2.302398 |
| H  | -2.029193 | -0.787649 | -1.555216 |
| H  | -0.481388 | 0.978270  | -2.110949 |
| H  | -1.569678 | 2.254101  | -1.539439 |
| H  | -2.032225 | 2.293472  | 4.414613  |
| H  | -1.046479 | 1.025596  | 5.160965  |
| H  | -2.492016 | -0.748249 | 4.397201  |
| H  | -3.580243 | 0.527334  | 4.969415  |
| N  | -4.483685 | -2.795741 | 3.544260  |
| C  | -5.186206 | -3.511709 | 4.154471  |
| C  | -6.062024 | -4.407003 | 4.918822  |
| H  | -6.365860 | -5.264183 | 4.297880  |
| H  | -5.535881 | -4.783037 | 5.810170  |
| H  | -6.965746 | -3.867522 | 5.242856  |
| N  | -4.118207 | -2.808757 | -1.072556 |
| C  | -4.716535 | -3.487847 | -1.820539 |
| C  | -5.462710 | -4.335728 | -2.757169 |
| H  | -4.924152 | -4.408682 | -3.714956 |
| H  | -5.584018 | -5.348021 | -2.341052 |
| H  | -6.460430 | -3.908298 | -2.943299 |
| N  | 0.056632  | 4.315460  | 3.930661  |
| N  | 0.419718  | 4.304342  | -0.691615 |
| C  | 0.654515  | 4.996247  | 4.677445  |
| C  | 1.121349  | 5.018083  | -1.305467 |
| C  | 1.399878  | 5.846904  | 5.612202  |
| H  | 1.876100  | 6.680013  | 5.072115  |
| H  | 0.720676  | 6.259950  | 6.374343  |
| H  | 2.182789  | 5.259729  | 6.117244  |
| C  | 1.995998  | 5.910629  | -2.074361 |
| H  | 2.899251  | 5.370013  | -2.397810 |
| H  | 1.468488  | 6.283452  | -2.966251 |
| H  | 2.300735  | 6.770061  | -1.456981 |
| N  | -1.498572 | -1.381903 | 1.482192  |
| N  | -2.562459 | 2.888868  | 1.375991  |
| C  | -2.527027 | 4.059633  | 1.384306  |

|   |           |           |          |
|---|-----------|-----------|----------|
| C | -1.532145 | -2.552699 | 1.472286 |
| C | -2.472554 | 5.520545  | 1.397038 |
| H | -2.017724 | 5.859051  | 2.340961 |
| H | -1.851684 | 5.868223  | 0.556846 |
| H | -3.484757 | 5.944356  | 1.304922 |
| C | -1.583528 | -4.013703 | 1.457341 |
| H | -2.191185 | -4.365074 | 2.305609 |
| H | -2.051043 | -4.351187 | 0.519251 |
| H | -0.569066 | -4.435238 | 1.533818 |

E = -2918.54520237

G = -2918.023931

E +  $\Delta G_{\text{soln}}$  = -2918.641267

### 3-BLYP-doublet

|    |           |           |           |
|----|-----------|-----------|-----------|
| C  | 0.661947  | 0.324475  | 0.308644  |
| C  | 0.402577  | 0.425772  | 2.923974  |
| C  | 1.314082  | 0.603954  | 1.684983  |
| H  | 0.299825  | -0.711911 | 0.242848  |
| H  | 1.412459  | 0.482022  | -0.486499 |
| H  | 0.983935  | 0.651524  | 3.834950  |
| H  | 0.020868  | -0.603046 | 2.997270  |
| H  | 1.734312  | 1.624969  | 1.691283  |
| H  | 2.169792  | -0.081999 | 1.794794  |
| C  | -4.346557 | 0.890670  | -0.198615 |
| C  | -4.598539 | 0.995677  | 2.420356  |
| C  | -5.210233 | 0.605973  | 1.053327  |
| H  | -4.883040 | 0.537468  | -1.095203 |
| H  | -4.116209 | 1.960212  | -0.291144 |
| H  | -5.297944 | 0.705350  | 3.222266  |
| H  | -4.389347 | 2.071917  | 2.479479  |
| H  | -6.154037 | 1.164302  | 0.940454  |
| H  | -5.482820 | -0.464499 | 1.070434  |
| Ni | -1.932232 | 0.893276  | 1.355693  |
| N  | -0.499005 | 1.255203  | 0.059854  |
| N  | -0.768777 | 1.374441  | 2.861432  |
| N  | -3.297924 | 0.259411  | 2.649666  |
| N  | -3.035450 | 0.143549  | -0.115372 |
| H  | -3.502783 | -0.744286 | 2.506509  |
| H  | -3.275193 | -0.844020 | 0.074448  |
| H  | -0.373115 | 2.326262  | 2.753646  |
| H  | -0.160999 | 2.230587  | 0.175677  |
| C  | -2.702084 | 0.348128  | 4.042933  |
| C  | -1.658466 | 1.462891  | 4.083867  |
| C  | -2.185440 | 0.108476  | -1.371299 |
| C  | -1.133630 | 1.216366  | -1.315481 |
| H  | -2.821433 | 0.209136  | -2.264936 |
| H  | -1.717919 | -0.885972 | -1.405557 |
| H  | -0.359956 | 1.075067  | -2.089059 |
| H  | -1.593465 | 2.203353  | -1.461820 |
| H  | -2.137000 | 2.450134  | 4.031250  |
| H  | -1.049595 | 1.415164  | 5.001753  |
| H  | -2.252219 | -0.632541 | 4.255113  |
| H  | -3.496486 | 0.519356  | 4.786502  |
| N  | -4.804645 | -2.312512 | 3.547480  |
| C  | -5.545296 | -3.013868 | 4.127960  |
| C  | -6.472239 | -3.887912 | 4.855570  |
| H  | -6.911946 | -4.630389 | 4.171491  |
| H  | -5.941427 | -4.418101 | 5.661691  |
| H  | -7.284905 | -3.292139 | 5.299902  |
| N  | -4.372939 | -2.481305 | -1.149528 |
| C  | -4.981951 | -3.223752 | -1.824378 |
| C  | -5.744046 | -4.148896 | -2.670606 |
| H  | -5.083107 | -4.609400 | -3.421480 |
| H  | -6.192748 | -4.945231 | -2.056572 |
| H  | -6.549489 | -3.608928 | -3.192625 |
| N  | 0.689625  | 3.901501  | 3.716200  |

|   |           |           |           |
|---|-----------|-----------|-----------|
| N | 0.262160  | 4.168025  | -0.237335 |
| C | 1.172222  | 4.770201  | 4.339527  |
| C | 0.596005  | 5.212750  | -0.652741 |
| C | 1.775262  | 5.855443  | 5.120064  |
| H | 2.762953  | 6.115847  | 4.708600  |
| H | 1.129977  | 6.747352  | 5.090906  |
| H | 1.900505  | 5.543397  | 6.168735  |
| C | 1.010748  | 6.518566  | -1.173249 |
| H | 2.085092  | 6.675762  | -0.989322 |
| H | 0.825355  | 6.569448  | -2.257614 |
| H | 0.441765  | 7.321176  | -0.678381 |
| N | -1.395102 | -2.322995 | 1.501499  |
| C | -1.253201 | -3.486568 | 1.563468  |
| C | -1.074702 | -4.939719 | 1.640761  |
| H | -2.053984 | -5.435926 | 1.725065  |
| H | -0.565757 | -5.308580 | 0.736480  |
| H | -0.466429 | -5.201821 | 2.520623  |
| O | -2.621909 | 2.777478  | 1.251236  |
| H | -1.931878 | 3.447507  | 1.060286  |

E = -2861.63056095

G = -2861.135098

E +  $\Delta G_{\text{soln}}$  = -2861.737982

### 4-BLYP-singlet

|    |           |           |           |
|----|-----------|-----------|-----------|
| C  | 0.857847  | 0.181449  | 0.346688  |
| C  | 0.565140  | 0.308629  | 2.984966  |
| C  | 1.459836  | 0.518721  | 1.735401  |
| H  | 0.619555  | -0.883185 | 0.229485  |
| H  | 1.599938  | 0.446964  | -0.427126 |
| H  | 1.123875  | 0.661564  | 3.869355  |
| H  | 0.293647  | -0.741190 | 3.151333  |
| H  | 1.806789  | 1.566206  | 1.728628  |
| H  | 2.364133  | -0.098312 | 1.862755  |
| C  | -4.282924 | 1.041599  | -0.251230 |
| C  | -4.563664 | 1.177912  | 2.375204  |
| C  | -5.187266 | 0.858920  | 0.993346  |
| H  | -4.856011 | 0.749515  | -1.149710 |
| H  | -3.940886 | 2.076368  | -0.369037 |
| H  | -5.316464 | 0.974168  | 3.158210  |
| H  | -4.243812 | 2.223575  | 2.461139  |
| H  | -6.058591 | 1.521305  | 0.865801  |
| H  | -5.584854 | -0.171241 | 1.003870  |
| Ni | -1.861801 | 0.602088  | 1.368342  |
| N  | -0.383484 | 0.997550  | 0.072541  |
| N  | -0.685746 | 1.146517  | 2.893447  |
| N  | -3.390831 | 0.278377  | 2.661753  |
| N  | -3.084117 | 0.131349  | -0.185898 |
| H  | -3.731098 | -0.701069 | 2.547269  |
| H  | -3.451647 | -0.833939 | -0.046785 |
| H  | -0.350936 | 2.122751  | 2.737960  |
| H  | -0.125772 | 1.996364  | 0.216776  |
| C  | -2.774003 | 0.313852  | 4.049938  |
| C  | -1.586612 | 1.276235  | 4.115181  |
| C  | -2.188984 | 0.019920  | -1.408021 |
| C  | -0.988686 | 0.968189  | -1.327066 |
| H  | -2.777302 | 0.232455  | -2.315325 |
| H  | -1.869779 | -1.030194 | -1.459676 |
| H  | -0.215991 | 0.668479  | -2.053226 |
| H  | -1.281189 | 2.003699  | -1.549072 |
| H  | -1.921706 | 2.321330  | 4.126612  |
| H  | -0.993579 | 1.094934  | 5.025488  |
| H  | -2.476173 | -0.718581 | 4.280737  |
| H  | -3.541051 | 0.610454  | 4.783609  |
| N  | -4.618226 | -2.359656 | 3.252738  |
| C  | -5.388040 | -3.052202 | 3.807519  |
| C  | -6.346478 | -3.915920 | 4.501636  |

|   |           |           |           |
|---|-----------|-----------|-----------|
| H | -6.459067 | -4.870349 | 3.963320  |
| H | -5.996953 | -4.123949 | 5.525514  |
| H | -7.329669 | -3.421626 | 4.556143  |
| N | -4.134048 | -2.595252 | -0.813875 |
| C | -4.751504 | -3.337996 | -1.482930 |
| C | -5.518161 | -4.265044 | -2.319314 |
| H | -4.860443 | -4.730919 | -3.070435 |
| H | -5.966978 | -5.056564 | -1.698471 |
| H | -6.324273 | -3.724500 | -2.840822 |
| N | 0.585803  | 3.690651  | 3.553287  |
| N | -0.159755 | 3.960948  | -0.063376 |
| C | 1.082209  | 4.560115  | 4.166292  |
| C | 0.155856  | 5.015024  | -0.473488 |
| C | 1.701474  | 5.644386  | 4.932499  |
| H | 2.683234  | 5.900016  | 4.503252  |
| H | 1.057969  | 6.538264  | 4.912747  |
| H | 1.843851  | 5.333624  | 5.979802  |
| C | 0.547268  | 6.327358  | -0.986986 |
| H | 1.623201  | 6.494029  | -0.817627 |
| H | 0.343426  | 6.386539  | -2.068210 |
| H | -0.023558 | 7.118031  | -0.473830 |
| N | -1.510255 | -1.348819 | 1.503762  |
| C | -1.482133 | -2.516530 | 1.564282  |
| C | -1.430050 | -3.971815 | 1.634747  |
| H | -1.517029 | -4.299686 | 2.683393  |
| H | -2.267512 | -4.389493 | 1.052987  |
| H | -0.477194 | -4.339154 | 1.219044  |
| O | -2.362896 | 2.378571  | 1.286913  |
| H | -1.645900 | 2.978639  | 0.960346  |

E = -2861.21048743

G = -2860.700213

E +  $\Delta G_{\text{soln}}$  = -2861.530848

#### 4-BLYP-triplet

|    |           |           |           |
|----|-----------|-----------|-----------|
| C  | 0.912448  | -0.006840 | 0.732604  |
| C  | 0.404596  | -0.008259 | 3.317112  |
| C  | 1.451200  | 0.098252  | 2.179553  |
| H  | 0.425539  | -0.973318 | 0.548104  |
| H  | 1.754680  | 0.101263  | 0.026583  |
| H  | 0.917523  | 0.128913  | 4.286636  |
| H  | -0.102284 | -0.982035 | 3.328178  |
| H  | 2.019192  | 1.036667  | 2.293989  |
| H  | 2.179387  | -0.717643 | 2.315918  |
| C  | -3.976901 | 0.983379  | -0.279980 |
| C  | -4.512020 | 1.109246  | 2.305044  |
| C  | -4.975020 | 0.739369  | 0.876350  |
| H  | -4.433429 | 0.615424  | -1.214115 |
| H  | -3.719694 | 2.045094  | -0.400323 |
| H  | -5.306437 | 0.819612  | 3.014038  |
| H  | -4.307799 | 2.181773  | 2.425388  |
| H  | -5.881992 | 1.326028  | 0.656632  |
| H  | -5.282938 | -0.320149 | 0.860856  |
| Ni | -1.724269 | 0.868999  | 1.535929  |
| N  | -0.089631 | 1.089106  | 0.414736  |
| N  | -0.622332 | 1.086893  | 3.195895  |
| N  | -3.274605 | 0.332324  | 2.682289  |
| N  | -2.694366 | 0.196205  | -0.083967 |
| H  | -3.503586 | -0.667211 | 2.506533  |
| H  | -2.986942 | -0.795245 | 0.039715  |
| H  | -0.094859 | 1.991084  | 3.098946  |
| H  | 0.347589  | 1.993522  | 0.653838  |
| C  | -2.829285 | 0.370309  | 4.144235  |
| C  | -1.622294 | 1.292000  | 4.318852  |
| C  | -1.705354 | 0.168293  | -1.246273 |
| C  | -0.577440 | 1.177091  | -1.024174 |
| H  | -2.238182 | 0.378665  | -2.186433 |

|   |           |           |           |
|---|-----------|-----------|-----------|
| H | -1.325504 | -0.860882 | -1.301844 |
| H | 0.261797  | 0.989197  | -1.714446 |
| H | -0.919665 | 2.210208  | -1.175849 |
| H | -1.917035 | 2.350181  | 4.267033  |
| H | -1.128523 | 1.116430  | 5.289393  |
| H | -2.590451 | -0.666552 | 4.418355  |
| H | -3.667061 | 0.700321  | 4.776836  |
| N | -4.861565 | -2.108760 | 3.337246  |
| C | -5.660327 | -2.788454 | 3.866127  |
| C | -6.657535 | -3.633940 | 4.528948  |
| H | -7.106793 | -4.331967 | 3.804975  |
| H | -6.186197 | -4.214095 | 5.338091  |
| H | -7.456197 | -3.009748 | 4.960381  |
| N | -3.970332 | -2.263269 | -1.157137 |
| C | -4.536820 | -3.003446 | -1.871763 |
| C | -5.243802 | -3.924767 | -2.765999 |
| H | -4.540602 | -4.364366 | -3.491093 |
| H | -5.710191 | -4.736328 | -2.185481 |
| H | -6.031173 | -3.387060 | -3.317858 |
| N | 0.968675  | 3.517661  | 3.165801  |
| N | -1.206403 | 4.595517  | -0.100965 |
| C | 1.630178  | 4.381431  | 3.607486  |
| C | -1.156957 | 5.654657  | -0.604012 |
| C | 2.455551  | 5.456888  | 4.158784  |
| H | 3.247152  | 5.732071  | 3.443506  |
| H | 1.833909  | 6.342804  | 4.365071  |
| H | 2.926307  | 5.125851  | 5.098486  |
| C | -1.090082 | 6.971493  | -1.234984 |
| H | -0.041926 | 7.237543  | -1.446795 |
| H | -1.655375 | 6.966010  | -2.181021 |
| H | -1.524999 | 7.730383  | -0.564494 |
| N | -1.538572 | -2.123848 | 1.643059  |
| C | -1.533846 | -3.297248 | 1.699363  |
| C | -1.520222 | -4.759155 | 1.771000  |
| H | -2.551194 | -5.145647 | 1.747148  |
| H | -0.962252 | -5.175859 | 0.917221  |
| H | -1.036977 | -5.089392 | 2.704526  |
| O | -2.195571 | 2.685501  | 1.515856  |
| H | -1.719942 | 3.382276  | 0.920880  |

E = -2861.17755538

G = -2860.679667

E +  $\Delta G_{\text{soln}}$  = -2861.492030

#### tBuOOH-6H<sub>2</sub>O-BLYP

|   |           |           |           |
|---|-----------|-----------|-----------|
| O | 0.454907  | -0.415351 | 0.349921  |
| H | 1.215548  | 0.244767  | 0.454477  |
| O | -0.668696 | 0.591171  | 0.194555  |
| O | 2.307549  | 1.601844  | 0.492517  |
| H | 1.904424  | 2.159344  | 1.197289  |
| H | 2.033987  | 2.034759  | -0.349938 |
| H | -1.526043 | 4.949075  | 2.800154  |
| O | -1.434964 | 4.399267  | 3.616077  |
| H | -2.300947 | 4.408685  | 4.062443  |
| H | -0.369603 | 3.023143  | 2.744061  |
| O | 0.114351  | 2.785203  | 1.914933  |
| H | -0.351515 | 2.012030  | 1.513219  |
| H | -0.361448 | 4.345419  | 1.107007  |
| O | -0.881080 | 5.179692  | 0.932401  |
| H | -0.226159 | 5.886399  | 0.777535  |
| H | 0.021831  | 1.555517  | -1.289985 |
| O | 0.568783  | 2.220701  | -1.782968 |
| H | 0.773292  | 1.816780  | -2.647597 |
| H | -1.668739 | 4.561086  | -0.878886 |
| O | -1.810345 | 4.037209  | -1.697967 |
| H | -0.941864 | 3.609623  | -1.864268 |
| C | -1.951103 | -0.153877 | 0.078794  |

|   |           |           |           |
|---|-----------|-----------|-----------|
| C | -1.944046 | -0.973999 | -1.228969 |
| H | -2.889466 | -1.531414 | -1.328268 |
| H | -1.846900 | -0.314141 | -2.106322 |
| H | -1.113440 | -1.694330 | -1.230916 |
| C | -2.147475 | -1.044709 | 1.322887  |
| H | -2.084036 | -0.445378 | 2.245027  |
| H | -3.143246 | -1.515717 | 1.286076  |
| H | -1.386506 | -1.835901 | 1.369313  |
| C | -2.983842 | 0.996430  | 0.029174  |
| H | -3.979245 | 0.569880  | -0.174050 |
| H | -3.033609 | 1.527801  | 0.992957  |
| H | -2.752575 | 1.729329  | -0.759875 |

E = -767.269766402

G = -767.042308

E +  $\Delta G_{\text{solv}}$  = -767.259768

### tBuOH-6H<sub>2</sub>O-BLYP

|   |           |           |           |
|---|-----------|-----------|-----------|
| O | -0.351403 | 0.869746  | 0.004025  |
| H | 0.528674  | 1.320518  | -0.315641 |
| H | 0.045574  | -0.942367 | 0.505868  |
| H | -1.024856 | 1.080058  | -0.669392 |
| O | 3.741792  | 0.891070  | 1.008017  |
| H | 4.403187  | 0.227852  | 0.740107  |
| O | 0.479215  | -1.693964 | 0.983631  |
| O | 1.858458  | 2.093192  | -0.598113 |
| H | 1.779654  | 2.942234  | -0.089637 |
| H | 2.616239  | 1.614456  | -0.154286 |
| H | 3.165955  | 0.455310  | 1.708183  |
| O | 1.952543  | -0.148433 | 2.791203  |
| H | 1.312917  | 0.582372  | 2.949694  |
| H | 1.436020  | -0.813163 | 2.260812  |
| O | -0.110594 | 2.006103  | 2.488893  |
| H | -0.916527 | 2.124424  | 3.024757  |
| H | -0.397597 | 1.605190  | 1.615717  |
| O | 1.344387  | 4.139801  | 1.300342  |
| H | 0.849452  | 3.514292  | 1.888221  |
| H | 2.120953  | 4.433092  | 1.812285  |
| C | -0.452894 | -2.817202 | 1.120890  |
| C | 0.350115  | -3.920397 | 1.840871  |
| H | 0.693625  | -3.568416 | 2.826766  |
| H | -0.270624 | -4.818548 | 1.989999  |
| H | 1.234426  | -4.201263 | 1.247278  |
| C | -1.675048 | -2.378594 | 1.966432  |
| H | -2.224185 | -1.561421 | 1.468559  |
| H | -2.376720 | -3.217248 | 2.111338  |
| H | -1.350545 | -2.024429 | 2.957989  |
| C | -0.890707 | -3.279491 | -0.290357 |
| H | -0.010857 | -3.552124 | -0.893923 |
| H | -1.559137 | -4.154687 | -0.229750 |
| H | -1.434514 | -2.476629 | -0.816816 |

E = -692.152902430

G = -691.926221

E +  $\Delta G_{\text{solv}}$  = -692.145541

### tBuO<sup>•</sup>-6H<sub>2</sub>O-BLYP

|   |           |           |           |
|---|-----------|-----------|-----------|
| O | -0.884489 | 1.236951  | 0.069192  |
| H | -0.041209 | 1.620399  | -0.369878 |
| H | -1.637370 | 1.622456  | -0.415834 |
| O | 3.390982  | 0.956080  | 0.446549  |
| H | 3.979472  | 0.264814  | 0.093716  |
| O | 1.170467  | -2.501025 | 1.661802  |
| O | 1.345199  | 2.346291  | -0.807863 |
| H | 1.391858  | 3.139791  | -0.215370 |
| H | 2.120195  | 1.791228  | -0.516170 |

|   |           |           |           |
|---|-----------|-----------|-----------|
| H | 2.951699  | 0.568023  | 1.260909  |
| O | 2.000722  | 0.045427  | 2.630181  |
| H | 1.234058  | 0.662617  | 2.722392  |
| H | 1.617559  | -0.845442 | 2.442697  |
| O | -0.145523 | 1.977705  | 2.530002  |
| H | -0.853728 | 2.070518  | 3.193322  |
| H | -0.583690 | 1.707579  | 1.657760  |
| O | 1.262603  | 4.180770  | 1.386557  |
| H | 0.809010  | 3.511346  | 1.958898  |
| H | 2.136491  | 4.329531  | 1.793477  |
| C | -0.036759 | -3.070003 | 1.298802  |
| C | -0.114001 | -4.342759 | 2.264026  |
| H | -0.117216 | -4.021894 | 3.314616  |
| H | -1.057008 | -4.861957 | 2.029695  |
| H | 0.738484  | -5.010500 | 2.081712  |
| C | -1.245114 | -2.131952 | 1.568938  |
| H | -1.154091 | -1.217692 | 0.961381  |
| H | -2.194080 | -2.631194 | 1.312112  |
| H | -1.278487 | -1.845005 | 2.632064  |
| C | 0.015247  | -3.562785 | -0.180224 |
| H | 0.878377  | -4.227420 | -0.334179 |
| H | -0.909192 | -4.103245 | -0.440850 |
| H | 0.114546  | -2.695928 | -0.851634 |

E = -691.481702340

G = -691.270725

E +  $\Delta G_{\text{solv}}$  = -691.474184

### CH<sub>3</sub>CN-BLYP

|   |           |          |           |
|---|-----------|----------|-----------|
| C | -1.636798 | 1.099993 | -0.020950 |
| N | -0.462969 | 1.100011 | -0.020949 |
| C | -3.106038 | 1.099990 | -0.020936 |
| H | -3.487777 | 2.117927 | -0.198576 |
| H | -3.487785 | 0.437200 | -0.813677 |
| H | -3.487811 | 0.744880 | 0.949427  |

E = -132.712727687

G = -132.692920

E +  $\Delta G_{\text{solv}}$  = -132.714184

### 6H<sub>2</sub>O-BLYP

|   |           |           |           |
|---|-----------|-----------|-----------|
| O | -0.655808 | 1.094534  | 0.632167  |
| H | -0.024651 | 0.893788  | -0.144534 |
| H | -0.475804 | -0.330506 | 1.822622  |
| H | -1.528487 | 1.273834  | 0.236127  |
| O | 3.222551  | -0.352040 | 0.035551  |
| H | 3.510062  | -1.280467 | -0.034991 |
| O | -0.100049 | -1.004487 | 2.446540  |
| H | -0.731526 | -1.084597 | 3.184216  |
| O | 1.084981  | 0.536480  | -1.285185 |
| H | 1.413565  | 1.296508  | -1.800442 |
| H | 1.904616  | 0.141872  | -0.836725 |
| H | 3.020714  | -0.185319 | 1.015122  |
| O | 2.478583  | 0.174440  | 2.558358  |
| H | 2.179083  | 1.117771  | 2.557647  |
| H | 1.639495  | -0.337206 | 2.686145  |
| O | 1.124167  | 2.671632  | 2.178100  |
| H | 0.745227  | 3.228913  | 2.881802  |
| H | 0.360094  | 2.294239  | 1.672857  |

E = -458.568129427

G = -458.463635

E +  $\Delta G_{\text{solv}}$  = -458.569683

### H<sub>2</sub>O-6H<sub>2</sub>O-BLYP

|   |           |          |          |
|---|-----------|----------|----------|
| O | -0.815186 | 0.743229 | 0.610033 |
|---|-----------|----------|----------|

|   |           |           |           |
|---|-----------|-----------|-----------|
| H | 0.006662  | 0.939231  | -0.002275 |
| H | -0.536232 | -0.852229 | 1.477947  |
| H | -1.609332 | 0.873780  | 0.059120  |
| O | 3.346469  | 0.221175  | 0.689878  |
| H | 3.825850  | -0.601939 | 0.485534  |
| O | -0.141485 | -1.556972 | 2.056949  |
| H | -0.878656 | -1.972822 | 2.539379  |
| O | 1.298014  | 1.351414  | -0.747020 |
| H | 1.460802  | 2.297152  | -0.491553 |
| H | 2.074335  | 0.855387  | -0.355772 |
| H | 2.925165  | 0.091487  | 1.593575  |
| O | 1.967415  | 0.019325  | 3.039064  |
| H | 1.487265  | 0.874424  | 3.119433  |
| H | 1.251604  | -0.642693 | 2.852365  |
| O | 0.181745  | 2.382951  | 2.580267  |
| H | -0.439185 | 2.783684  | 3.216449  |
| H | -0.367387 | 1.849934  | 1.934068  |
| O | 1.539489  | 3.854753  | 0.557805  |
| H | 1.142028  | 3.498985  | 1.392518  |
| H | 2.446811  | 4.130090  | 0.785987  |

E = -534.999856858

G = -534.872830

E +  $\Delta G_{\text{solv}}$  = -534.999654

#### HOOH-6H<sub>2</sub>O-BLYP

|   |           |           |           |
|---|-----------|-----------|-----------|
| O | 0.525244  | 1.468826  | 0.762792  |
| H | 1.248806  | 1.795008  | 0.148438  |
| O | -0.705789 | 1.793816  | -0.029746 |
| H | -1.261666 | 0.927524  | 0.154624  |
| O | 2.377911  | 2.070510  | -1.176236 |
| H | 2.713339  | 2.966561  | -1.363551 |
| H | 1.797262  | 1.818043  | -1.938150 |
| H | -0.673895 | 2.057034  | 3.736058  |
| O | -0.191290 | 1.260728  | 3.447141  |
| H | 0.144400  | 1.469261  | 2.536380  |
| H | -1.929286 | -0.766406 | 1.189396  |
| O | -2.050638 | -0.391271 | 0.272473  |
| H | -1.628706 | -1.012922 | -0.373650 |
| H | -2.245681 | -1.309565 | 3.522792  |
| O | -1.541845 | -1.096416 | 2.883894  |
| H | -1.087953 | -0.274013 | 3.221218  |
| H | -0.301088 | 1.468596  | -1.662163 |
| O | 0.118150  | 1.141823  | -2.523489 |
| H | -0.401270 | 1.523400  | -3.256010 |
| H | 0.115493  | -2.165532 | -1.757297 |
| O | -0.642452 | -1.568121 | -1.896586 |
| H | -0.261057 | -0.721706 | -2.239346 |

E = -610.122534996

G = -609.996599

E +  $\Delta G_{\text{solv}}$  = -610.122635

#### OH<sup>-</sup>-6H<sub>2</sub>O-BLYP

|   |           |           |           |
|---|-----------|-----------|-----------|
| O | -0.823197 | 0.746257  | 0.610419  |
| H | -0.004220 | 0.955061  | 0.004044  |
| H | -0.521042 | -0.848129 | 1.496152  |
| H | -1.616758 | 0.848626  | 0.052691  |
| O | 3.334219  | 0.265979  | 0.651589  |
| H | 3.829183  | -0.543731 | 0.431829  |
| O | -0.104147 | -1.535808 | 2.078248  |
| H | -0.826220 | -1.977757 | 2.560266  |
| O | 1.291559  | 1.386800  | -0.743197 |
| H | 1.447289  | 2.339629  | -0.536233 |
| H | 2.082416  | 0.907573  | -0.351247 |
| H | 2.938217  | 0.128941  | 1.565282  |

|   |           |           |          |
|---|-----------|-----------|----------|
| O | 2.001003  | 0.061428  | 3.022618 |
| H | 1.527597  | 0.917993  | 3.111749 |
| H | 1.281025  | -0.599505 | 2.848695 |
| O | 0.135594  | 2.417243  | 2.557291 |
| H | -0.473911 | 2.786644  | 3.223155 |
| H | -0.409708 | 1.856807  | 1.930602 |
| O | 1.405507  | 4.003892  | 0.622622 |
| H | 1.051660  | 3.540466  | 1.445321 |

E = -534.307228150

G = -534.194684

E +  $\Delta G_{\text{solv}}$  = -534.305582

#### OH<sup>-</sup>-6H<sub>2</sub>O-BLYP

|   |           |           |           |
|---|-----------|-----------|-----------|
| O | -0.699863 | 0.646822  | 0.872400  |
| H | 0.521387  | 1.099216  | -0.360424 |
| H | -0.156022 | -0.623796 | 1.365035  |
| H | -1.614346 | 0.658000  | 0.537238  |
| O | 2.973653  | -0.511878 | 0.807446  |
| H | 2.168666  | -1.073484 | 0.922789  |
| O | 0.418676  | -1.432741 | 1.764931  |
| H | -0.152552 | -2.220494 | 1.781699  |
| O | 1.331469  | 1.361632  | -0.891114 |
| H | 1.431596  | 3.204103  | -0.249303 |
| H | 2.045991  | 0.823865  | -0.474033 |
| H | 2.983139  | -0.024317 | 1.665225  |
| O | 1.937379  | 0.375886  | 3.490465  |
| H | 1.404045  | 1.179627  | 3.255610  |
| H | 1.364342  | -0.365314 | 3.181065  |
| O | 0.146792  | 2.413932  | 2.518629  |
| H | -0.558302 | 2.696796  | 3.128441  |
| H | -0.300133 | 1.732872  | 1.848844  |
| O | 1.337493  | 4.032490  | 0.287655  |
| H | 0.962656  | 3.685194  | 1.129299  |

E = -534.466081304

G = -534.353255

E +  $\Delta G_{\text{solv}}$  = -534.523649

#### H<sub>3</sub>O<sup>+</sup>-6H<sub>2</sub>O-BLYP

|   |           |           |           |
|---|-----------|-----------|-----------|
| O | -1.092448 | 0.651464  | 0.529314  |
| H | 0.414735  | 1.097423  | -0.649357 |
| H | -0.487782 | -1.077514 | 1.084385  |
| H | -2.015334 | 0.747482  | 0.222619  |
| O | 2.385304  | -0.413617 | 0.872472  |
| H | 1.584980  | -1.046115 | 1.090835  |
| O | 0.232914  | -1.673681 | 1.411713  |
| H | 0.004386  | -2.597460 | 1.194641  |
| O | 1.388675  | 1.192469  | -0.800037 |
| H | 1.614005  | 2.122482  | -0.555566 |
| H | 2.039122  | 0.249404  | 0.103306  |
| H | 2.557625  | 0.170160  | 1.683937  |
| O | 2.577248  | 1.436545  | 2.787496  |
| H | 1.650034  | 1.687749  | 3.030334  |
| H | 3.079351  | 1.317851  | 3.617717  |
| O | -0.041807 | 2.493950  | 2.429195  |
| H | -0.586670 | 2.985055  | 3.075582  |
| H | -0.961358 | 1.305525  | 1.265175  |
| O | 1.943408  | 3.588364  | 0.752164  |
| H | 0.421661  | 3.168899  | 1.869958  |
| H | 2.691426  | 3.296446  | 1.318059  |
| H | 2.180183  | 4.475482  | 0.415035  |

E = -535.369177753

G = -535.228903

E +  $\Delta G_{\text{solv}}$  = -535.428465

### 1-OLYP

|    |           |           |           |
|----|-----------|-----------|-----------|
| C  | 0.561326  | 0.879377  | 0.226020  |
| C  | 0.445804  | 0.869293  | 2.883889  |
| C  | 1.106989  | 1.370303  | 1.583069  |
| H  | 0.653852  | -0.208920 | 0.127819  |
| H  | 1.163256  | 1.342302  | -0.569318 |
| H  | 0.973195  | 1.329232  | 3.732889  |
| H  | 0.537124  | -0.219054 | 2.984679  |
| H  | 1.104070  | 2.471100  | 1.585586  |
| H  | 2.167088  | 1.084266  | 1.628761  |
| C  | -4.475926 | 0.888763  | 0.007976  |
| C  | -4.595021 | 0.869284  | 2.649631  |
| C  | -5.289882 | 0.629595  | 1.292910  |
| H  | -5.154195 | 0.823606  | -0.858690 |
| H  | -4.063081 | 1.906000  | 0.016472  |
| H  | -5.347122 | 0.788167  | 3.451506  |
| H  | -4.186243 | 1.887420  | 2.695600  |
| H  | -6.159804 | 1.300385  | 1.258254  |
| H  | -5.703535 | -0.389885 | 1.267314  |
| Ni | -2.060635 | 0.214633  | 1.434746  |
| N  | -0.873959 | 1.251568  | 0.051893  |
| N  | -1.002846 | 1.230282  | 2.937190  |
| N  | -3.492682 | -0.104723 | 2.896425  |
| N  | -3.356018 | -0.082168 | -0.157992 |
| H  | -3.896609 | -1.044332 | 2.847220  |
| H  | -3.759201 | -1.023281 | -0.163899 |
| H  | -1.058170 | 2.221477  | 2.696008  |
| H  | -0.945212 | 2.238586  | 0.307566  |
| C  | -2.785178 | -0.022559 | 4.205600  |
| C  | -1.721240 | 1.090461  | 4.242748  |
| C  | -2.534168 | 0.027186  | -1.396642 |
| C  | -1.476100 | 1.143039  | -1.313882 |
| H  | -3.166479 | 0.187364  | -2.284004 |
| H  | -2.048918 | -0.947609 | -1.522080 |
| H  | -0.701901 | 0.965644  | -2.071727 |
| H  | -1.924550 | 2.114548  | -1.551798 |
| H  | -2.183043 | 2.058196  | 4.468290  |
| H  | -1.015705 | 0.888581  | 5.058977  |
| H  | -2.314219 | -1.001441 | 4.353419  |
| H  | -3.494691 | 0.121314  | 5.035635  |
| N  | -4.897830 | -3.039329 | 3.517237  |
| C  | -5.611707 | -3.814210 | 4.030844  |
| C  | -6.501912 | -4.776642 | 4.670978  |
| H  | -6.569543 | -5.690868 | 4.068081  |
| H  | -6.123603 | -5.037604 | 5.667374  |
| H  | -7.506860 | -4.348808 | 4.776708  |
| N  | -4.556634 | -3.037141 | -1.114238 |
| C  | -5.138108 | -3.809423 | -1.777159 |
| C  | -5.863432 | -4.767139 | -2.605116 |
| H  | -5.463210 | -4.763263 | -3.626822 |
| H  | -5.765002 | -5.778665 | -2.191566 |
| H  | -6.927907 | -4.503412 | -2.642714 |
| N  | 0.238038  | 4.213976  | 4.978139  |
| N  | 0.976608  | 4.204174  | -1.655453 |
| C  | 0.699552  | 4.919032  | 5.793562  |
| C  | 1.645669  | 4.882868  | -2.338692 |
| C  | 1.273578  | 5.794438  | 6.811253  |
| H  | 1.893601  | 6.568275  | 6.341227  |
| H  | 0.476133  | 6.282028  | 7.386227  |
| H  | 1.899517  | 5.214040  | 7.500852  |
| C  | 2.479644  | 5.725304  | -3.190983 |
| H  | 3.298779  | 5.135306  | -3.621299 |
| H  | 1.882315  | 6.146797  | -4.009356 |
| H  | 2.909485  | 6.549076  | -2.607164 |
| N  | -1.360484 | -1.658321 | 1.459113  |

|   |           |           |          |
|---|-----------|-----------|----------|
| N | -2.183567 | 4.120721  | 1.377092 |
| C | -2.221228 | 5.291997  | 1.359563 |
| C | -1.111858 | -2.799505 | 1.461431 |
| C | -2.265755 | 6.748739  | 1.338462 |
| H | -1.848047 | 7.149628  | 2.270458 |
| H | -1.678700 | 7.129634  | 0.493222 |
| H | -3.301691 | 7.095604  | 1.236081 |
| C | -0.808630 | -4.221236 | 1.470034 |
| H | -1.277057 | -4.693937 | 2.342954 |
| H | -1.203700 | -4.689124 | 0.558773 |
| H | 0.276584  | -4.379245 | 1.514598 |

E = -2918.93584214

G = -2918.413296

E +  $\Delta G_{\text{soln}}$  = -2919.030506

### 3-OLYP-doublet

|    |           |           |           |
|----|-----------|-----------|-----------|
| C  | 0.568986  | 0.449710  | 0.305972  |
| C  | 0.370711  | 0.443698  | 2.911281  |
| C  | 1.252131  | 0.653184  | 1.668674  |
| H  | 0.195335  | -0.574657 | 0.199511  |
| H  | 1.306914  | 0.625242  | -0.491936 |
| H  | 0.978792  | 0.614769  | 3.812693  |
| H  | -0.015205 | -0.580857 | 2.954587  |
| H  | 1.708361  | 1.652799  | 1.706066  |
| H  | 2.084381  | -0.060831 | 1.730521  |
| C  | -4.412047 | 0.959400  | -0.063661 |
| C  | -4.604933 | 0.943605  | 2.545315  |
| C  | -5.228252 | 0.594119  | 1.185489  |
| H  | -4.958497 | 0.620529  | -0.955013 |
| H  | -4.236719 | 2.037013  | -0.129250 |
| H  | -5.275767 | 0.593979  | 3.342542  |
| H  | -4.443458 | 2.020352  | 2.649707  |
| H  | -6.186488 | 1.126818  | 1.118153  |
| H  | -5.476731 | -0.477460 | 1.160931  |
| Ni | -1.965965 | 1.001732  | 1.427128  |
| N  | -0.566187 | 1.404593  | 0.119083  |
| N  | -0.779760 | 1.398776  | 2.929158  |
| N  | -3.282143 | 0.262176  | 2.717891  |
| N  | -3.078548 | 0.277673  | -0.048019 |
| H  | -3.439095 | -0.731602 | 2.520937  |
| H  | -3.263841 | -0.716960 | 0.116732  |
| H  | -0.388409 | 2.347634  | 2.861703  |
| H  | -0.191386 | 2.353628  | 0.250744  |
| C  | -2.668315 | 0.303580  | 4.091292  |
| C  | -1.637989 | 1.416621  | 4.159846  |
| C  | -2.270606 | 0.325768  | -1.316388 |
| C  | -1.232253 | 1.430153  | -1.225809 |
| H  | -2.926874 | 0.477857  | -2.182586 |
| H  | -1.803052 | -0.657907 | -1.433251 |
| H  | -0.483217 | 1.340088  | -2.025331 |
| H  | -1.701725 | 2.414909  | -1.309899 |
| H  | -2.122813 | 2.397419  | 4.174972  |
| H  | -1.015541 | 1.329779  | 5.061637  |
| H  | -2.213315 | -0.677363 | 4.266369  |
| H  | -3.445033 | 0.441679  | 4.854015  |
| N  | -4.865848 | -2.546238 | 3.783623  |
| C  | -5.549892 | -3.297710 | 4.368063  |
| C  | -6.402804 | -4.230324 | 5.097658  |
| H  | -6.823519 | -4.976337 | 4.411797  |
| H  | -5.822853 | -4.748805 | 5.871523  |
| H  | -7.228022 | -3.690547 | 5.579066  |
| N  | -4.518302 | -2.512361 | -1.355206 |
| C  | -5.117462 | -3.251107 | -2.040388 |
| C  | -5.864606 | -4.167883 | -2.895261 |
| H  | -5.197836 | -4.620470 | -3.639997 |
| H  | -6.315511 | -4.966467 | -2.292894 |



|   |           |           |           |
|---|-----------|-----------|-----------|
| H | -6.663774 | -3.629220 | -3.419939 |
| N | 0.464557  | 4.185927  | 3.717483  |
| N | 0.742001  | 4.222459  | -0.385449 |
| C | 0.870672  | 5.122106  | 4.292725  |
| C | 1.217412  | 5.184031  | -0.856108 |
| C | 1.374874  | 6.287075  | 5.010231  |
| H | 2.426545  | 6.464432  | 4.752231  |
| H | 0.788914  | 7.176324  | 4.745678  |
| H | 1.300185  | 6.124787  | 6.092930  |
| C | 1.808049  | 6.380929  | -1.443089 |
| H | 2.810248  | 6.549967  | -1.029502 |
| H | 1.890518  | 6.266187  | -2.531291 |
| H | 1.181855  | 7.255770  | -1.227093 |
| N | -1.384002 | -2.684618 | 1.446091  |
| C | -1.263256 | -3.850575 | 1.442453  |
| C | -1.113968 | -5.301303 | 1.437835  |
| H | -2.092095 | -5.780452 | 1.570354  |
| H | -0.682725 | -5.634585 | 0.485448  |
| H | -0.451936 | -5.617068 | 2.253984  |
| O | -2.683608 | 2.863465  | 1.379642  |
| H | -2.013387 | 3.564194  | 1.427727  |

E = -2861.99131903

G = -2861.488050

E +  $\Delta G_{\text{solv}}$  = -2862.099118

### 3-OLYP-quartet

|    |           |           |           |
|----|-----------|-----------|-----------|
| C  | 0.807500  | 0.248598  | 0.534378  |
| C  | 0.378458  | 0.365416  | 3.122375  |
| C  | 1.367711  | 0.480546  | 1.948210  |
| H  | 0.316266  | -0.730064 | 0.477127  |
| H  | 1.644595  | 0.231285  | -0.182411 |
| H  | 0.940690  | 0.422499  | 4.068356  |
| H  | -0.136144 | -0.603664 | 3.107827  |
| H  | 1.882853  | 1.451319  | 1.995024  |
| H  | 2.148989  | -0.275305 | 2.108033  |
| C  | -4.126817 | 0.502617  | -0.221299 |
| C  | -4.568492 | 0.792239  | 2.371048  |
| C  | -4.981361 | 0.182063  | 1.019241  |
| H  | -4.555458 | -0.034943 | -1.079016 |
| H  | -4.134835 | 1.574945  | -0.446305 |
| H  | -5.282687 | 0.452462  | 3.135042  |
| H  | -4.590493 | 1.888179  | 2.343754  |
| H  | -6.000664 | 0.529349  | 0.801781  |
| H  | -5.060483 | -0.910009 | 1.129859  |
| Ni | -1.829958 | 1.297014  | 1.411359  |
| N  | -0.173581 | 1.291582  | 0.115910  |
| N  | -0.632092 | 1.458612  | 3.095043  |
| N  | -3.190653 | 0.353023  | 2.751427  |
| N  | -2.701667 | 0.068135  | -0.057086 |
| H  | -3.152745 | -0.655144 | 2.590555  |
| H  | -2.706868 | -0.885092 | 0.316464  |
| H  | -0.118234 | 2.348674  | 3.059648  |
| H  | 0.280603  | 2.206495  | 0.155508  |
| C  | -2.738398 | 0.565801  | 4.160045  |
| C  | -1.580559 | 1.575345  | 4.240103  |
| C  | -1.842961 | 0.047495  | -1.280111 |
| C  | -0.761212 | 1.140794  | -1.244866 |
| H  | -2.454264 | 0.172432  | -2.181831 |
| H  | -1.389726 | -0.947630 | -1.345265 |
| H  | 0.016138  | 0.909855  | -1.989856 |
| H  | -1.190291 | 2.114312  | -1.505551 |
| H  | -1.965817 | 2.600799  | 4.202806  |
| H  | -1.048100 | 1.457480  | 5.196164  |
| H  | -2.436656 | -0.407964 | 4.561958  |
| H  | -3.567257 | 0.919935  | 4.785431  |
| N  | -5.016798 | -2.427393 | 4.528287  |

|   |           |           |           |
|---|-----------|-----------|-----------|
| C | -5.728352 | -3.020090 | 5.247671  |
| C | -6.616102 | -3.754861 | 6.143712  |
| H | -7.295500 | -4.393592 | 5.565398  |
| H | -6.031260 | -4.386338 | 6.824296  |
| H | -7.214788 | -3.055456 | 6.740722  |
| N | -4.204563 | -2.669632 | -2.404003 |
| C | -4.695756 | -3.308379 | -3.255939 |
| C | -5.307697 | -4.102449 | -4.316974 |
| H | -4.535889 | -4.640096 | -4.881988 |
| H | -6.005813 | -4.833230 | -3.889777 |
| H | -5.859337 | -3.451481 | -5.006888 |
| N | 1.069312  | 4.052804  | 3.678951  |
| N | -0.402212 | 4.848697  | -0.238331 |
| C | 1.651967  | 4.912702  | 4.220673  |
| C | -0.174263 | 5.894745  | -0.714350 |
| C | 2.376303  | 5.982339  | 4.896946  |
| H | 3.231173  | 6.304068  | 4.288909  |
| H | 1.713929  | 6.841559  | 5.061588  |
| H | 2.747007  | 5.631070  | 5.868206  |
| C | 0.108260  | 7.194955  | -1.308637 |
| H | 1.177566  | 7.425944  | -1.223297 |
| H | -0.170467 | 7.193267  | -2.369998 |
| H | -0.466193 | 7.975528  | -0.793780 |
| N | -2.035488 | -2.731547 | 1.486145  |
| C | -2.117415 | -3.897679 | 1.568134  |
| C | -2.223039 | -5.346954 | 1.672155  |
| H | -2.858471 | -5.614810 | 2.525734  |
| H | -2.666873 | -5.756330 | 0.755837  |
| H | -1.229829 | -5.791141 | 1.814621  |
| O | -2.381514 | 2.997400  | 1.149878  |
| H | -1.731358 | 3.650116  | 0.807355  |

E = -2861.97027522

G = -2861.470704

E +  $\Delta G_{\text{solv}}$  = -2862.076600

### 4-singlet-OLYP

|    |           |           |           |
|----|-----------|-----------|-----------|
| C  | 0.854389  | 0.213563  | 0.323529  |
| C  | 0.580107  | 0.342341  | 2.950085  |
| C  | 1.455854  | 0.555230  | 1.700211  |
| H  | 0.648655  | -0.852488 | 0.199052  |
| H  | 1.589038  | 0.497708  | -0.446507 |
| H  | 1.144379  | 0.709364  | 3.821039  |
| H  | 0.336543  | -0.707131 | 3.131828  |
| H  | 1.805800  | 1.596780  | 1.689974  |
| H  | 2.359283  | -0.057610 | 1.822381  |
| C  | -4.273241 | 1.027135  | -0.238536 |
| C  | -4.537308 | 1.160640  | 2.377050  |
| C  | -5.164544 | 0.855490  | 1.004751  |
| H  | -4.856621 | 0.727927  | -1.123912 |
| H  | -3.943571 | 2.059383  | -0.375000 |
| H  | -5.288571 | 0.947855  | 3.154521  |
| H  | -4.232305 | 2.205344  | 2.476241  |
| H  | -6.020802 | 1.532463  | 0.883767  |
| H  | -5.585319 | -0.160151 | 1.013538  |
| Ni | -1.851193 | 0.598191  | 1.356862  |
| N  | -0.391600 | 0.995683  | 0.051850  |
| N  | -0.675853 | 1.147200  | 2.875034  |
| N  | -3.370977 | 0.274731  | 2.656086  |
| N  | -3.082657 | 0.129887  | -0.184290 |
| H  | -3.706137 | -0.694230 | 2.536975  |
| H  | -3.445914 | -0.823187 | -0.033610 |
| H  | -0.371804 | 2.119197  | 2.710277  |
| H  | -0.142359 | 1.990662  | 0.181043  |
| C  | -2.747277 | 0.305254  | 4.025216  |
| C  | -1.563688 | 1.257920  | 4.090537  |
| C  | -2.201332 | 0.013479  | -1.397885 |



|   |           |           |           |
|---|-----------|-----------|-----------|
| C | -1.000385 | 0.947309  | -1.329797 |
| H | -2.786535 | 0.227710  | -2.302410 |
| H | -1.890520 | -1.034124 | -1.456192 |
| H | -0.239761 | 0.631659  | -2.056391 |
| H | -1.283881 | 1.976083  | -1.572588 |
| H | -1.894904 | 2.299242  | 4.125632  |
| H | -0.972339 | 1.063778  | 4.994829  |
| H | -2.452411 | -0.723370 | 4.255490  |
| H | -3.501451 | 0.600219  | 4.767536  |
| N | -4.703202 | -2.433975 | 3.314948  |
| C | -5.468351 | -3.135519 | 3.861155  |
| C | -6.418165 | -4.005887 | 4.541588  |
| H | -6.522332 | -4.953574 | 3.997782  |
| H | -6.072366 | -4.218996 | 5.561419  |
| H | -7.401394 | -3.520669 | 4.596559  |
| N | -4.278526 | -2.660499 | -0.891970 |
| C | -4.909638 | -3.403787 | -1.544332 |
| C | -5.691756 | -4.326472 | -2.356736 |
| H | -5.053367 | -4.796627 | -3.115989 |
| H | -6.129286 | -5.111046 | -1.726114 |
| H | -6.503348 | -3.787770 | -2.862971 |
| N | 0.585274  | 3.810766  | 3.663950  |
| N | -0.056150 | 3.994893  | -0.135348 |
| C | 1.056494  | 4.685137  | 4.286911  |
| C | 0.284866  | 5.043339  | -0.533817 |
| C | 1.641863  | 5.770895  | 5.062406  |
| H | 2.631549  | 6.029624  | 4.664509  |
| H | 0.996979  | 6.657981  | 5.017896  |
| H | 1.752752  | 5.467959  | 6.111636  |
| C | 0.707219  | 6.343796  | -1.029729 |
| H | 1.781542  | 6.483824  | -0.851936 |
| H | 0.513459  | 6.417267  | -2.107907 |
| H | 0.153271  | 7.139984  | -0.515206 |
| N | -1.490845 | -1.355765 | 1.491798  |
| C | -1.426474 | -2.520127 | 1.557309  |
| C | -1.330566 | -3.964360 | 1.636344  |
| H | -1.375489 | -4.284666 | 2.686159  |
| H | -2.169043 | -4.412383 | 1.086473  |
| H | -0.383380 | -4.305452 | 1.196025  |
| O | -2.348437 | 2.360678  | 1.278578  |
| H | -1.641972 | 2.954742  | 0.954917  |

E = -2861.55575084

G = -2861.037455

E +  $\Delta G_{\text{solv}}$  = -2861.877307

#### tBuOOH-6H<sub>2</sub>O-OLYP

|   |           |           |           |
|---|-----------|-----------|-----------|
| O | 0.397205  | -0.523965 | 0.212662  |
| H | 1.121643  | 0.133298  | 0.366341  |
| O | -0.737774 | 0.422699  | 0.083985  |
| O | 2.376958  | 1.515144  | 0.468173  |
| H | 2.057860  | 2.084617  | 1.186708  |
| H | 2.166479  | 2.006454  | -0.343179 |
| H | -1.594716 | 5.144116  | 3.034737  |
| O | -1.575056 | 4.544994  | 3.801380  |
| H | -2.445368 | 4.612899  | 4.213997  |
| H | -0.396708 | 3.070627  | 2.848747  |
| O | 0.106074  | 2.848452  | 2.044871  |
| H | -0.370012 | 2.110987  | 1.630122  |
| H | -0.268910 | 4.607631  | 1.217133  |
| O | -0.720016 | 5.462089  | 1.059112  |
| H | -0.013492 | 6.116254  | 0.972526  |
| H | 0.027358  | 1.613857  | -1.547241 |
| O | 0.559858  | 2.319444  | -1.956077 |

|   |           |           |           |
|---|-----------|-----------|-----------|
| H | 0.742484  | 2.012548  | -2.854699 |
| H | -1.518947 | 5.019255  | -1.011796 |
| O | -1.644994 | 4.623355  | -1.888257 |
| H | -0.901476 | 4.006968  | -1.976874 |
| C | -1.979906 | -0.348160 | 0.058601  |
| C | -2.003705 | -1.276844 | -1.169414 |
| H | -2.958885 | -1.814693 | -1.217386 |
| H | -1.892400 | -0.701495 | -2.097087 |
| H | -1.196651 | -2.014620 | -1.119028 |
| C | -2.147327 | -1.134978 | 1.370932  |
| H | -2.116543 | -0.461724 | 2.236630  |
| H | -3.114034 | -1.654151 | 1.377393  |
| H | -1.354681 | -1.880586 | 1.486465  |
| C | -3.042479 | 0.760891  | -0.064894 |
| H | -4.035931 | 0.300414  | -0.124819 |
| H | -3.032975 | 1.426647  | 0.806664  |
| H | -2.895157 | 1.367911  | -0.965621 |

E = -767.222164200

G = -766.999078

E +  $\Delta G_{\text{solv}}$  = -767.209675

#### tBuOH-6H<sub>2</sub>O-OLYP

|   |           |           |           |
|---|-----------|-----------|-----------|
| O | -0.474840 | 0.980989  | 0.011468  |
| H | 0.379406  | 1.371614  | -0.338180 |
| H | -0.082849 | -1.027958 | 0.613028  |
| H | -1.144177 | 1.214425  | -0.645173 |
| O | 3.844293  | 0.857348  | 0.907503  |
| H | 4.496415  | 0.194260  | 0.648541  |
| O | 0.356475  | -1.743881 | 1.106935  |
| O | 1.850908  | 2.144785  | -0.732904 |
| H | 1.833709  | 2.993797  | -0.251220 |
| H | 2.596035  | 1.658215  | -0.321844 |
| H | 3.316501  | 0.442800  | 1.627759  |
| O | 2.083601  | -0.189342 | 2.887443  |
| H | 1.489672  | 0.543206  | 3.114118  |
| H | 1.510534  | -0.818819 | 2.406739  |
| O | -0.132237 | 2.217775  | 2.599554  |
| H | -0.932166 | 2.395085  | 3.111408  |
| H | -0.438317 | 1.808727  | 1.761143  |
| O | 1.470080  | 4.342726  | 1.246324  |
| H | 0.970796  | 3.770409  | 1.858651  |
| H | 2.256644  | 4.616373  | 1.736388  |
| C | -0.504844 | -2.907670 | 1.146424  |
| C | 0.305228  | -3.984620 | 1.886236  |
| H | 0.554378  | -3.653543 | 2.902144  |
| H | -0.264766 | -4.918982 | 1.959865  |
| H | 1.242377  | -4.192256 | 1.355208  |
| C | -1.801425 | -2.572221 | 1.914723  |
| H | -2.365978 | -1.778574 | 1.406334  |
| H | -2.456075 | -3.450646 | 1.990976  |
| H | -1.568266 | -2.228529 | 2.930303  |
| C | -0.821077 | -3.355018 | -0.296277 |
| H | 0.106188  | -3.557777 | -0.846117 |
| H | -1.434713 | -4.265588 | -0.305238 |
| H | -1.374533 | -2.575778 | -0.838302 |

E = -692.120449956

G = -691.893372

E +  $\Delta G_{\text{solv}}$  = -692.109800

#### tBuO<sup>•</sup>-6H<sub>2</sub>O-OLYP

|   |           |          |           |
|---|-----------|----------|-----------|
| O | -0.948176 | 1.525562 | -0.017808 |
| H | -0.113383 | 1.847832 | -0.453168 |

|   |           |           |           |
|---|-----------|-----------|-----------|
| H | -1.665721 | 1.953299  | -0.502800 |
| O | 3.480461  | 0.966175  | 0.373786  |
| H | 4.065482  | 0.266375  | 0.058098  |
| O | 1.033542  | -2.635272 | 1.703553  |
| O | 1.429540  | 2.546190  | -0.951080 |
| H | 1.534986  | 3.318418  | -0.364755 |
| H | 2.158914  | 1.953667  | -0.678586 |
| H | 3.050696  | 0.607530  | 1.182274  |
| O | 2.041091  | 0.086396  | 2.684393  |
| H | 1.299442  | 0.710715  | 2.777538  |
| H | 1.629770  | -0.779343 | 2.524420  |
| O | -0.156092 | 2.183168  | 2.575453  |
| H | -0.871655 | 2.297110  | 3.214020  |
| H | -0.590121 | 1.961951  | 1.715329  |
| O | 1.480064  | 4.428237  | 1.407495  |
| H | 0.989840  | 3.795696  | 1.964371  |
| H | 2.349296  | 4.507754  | 1.822438  |
| C | -0.124594 | -3.269910 | 1.337869  |
| C | -0.155561 | -4.513232 | 2.322743  |
| H | -0.191942 | -4.173568 | 3.362661  |
| H | -1.062220 | -5.085918 | 2.090716  |
| H | 0.728368  | -5.140469 | 2.172671  |
| C | -1.379127 | -2.391306 | 1.567336  |
| H | -1.327051 | -1.496103 | 0.936143  |
| H | -2.298119 | -2.937236 | 1.317488  |
| H | -1.438138 | -2.071312 | 2.614746  |
| C | -0.029564 | -3.786263 | -0.123965 |
| H | 0.859948  | -4.412978 | -0.253501 |
| H | -0.920542 | -4.367985 | -0.392602 |
| H | 0.045579  | -2.932456 | -0.808479 |

E = -691.448289977

G = -691.237787

E +  $\Delta G_{\text{solv}}$  = -691.438338

### CH<sub>3</sub>CN-OLYP

|   |           |          |           |
|---|-----------|----------|-----------|
| C | -1.642728 | 1.100004 | -0.020937 |
| N | -0.470618 | 1.100000 | -0.020969 |
| C | -3.103875 | 1.099995 | -0.020922 |
| H | -3.483974 | 2.114273 | -0.197942 |
| H | -3.483958 | 0.439578 | -0.810828 |
| H | -3.484023 | 0.746149 | 0.945939  |

E = -132.720607284

G = -132.700218

E +  $\Delta G_{\text{solv}}$  = -132.721942

### 6H<sub>2</sub>O-OLYP

|   |           |           |           |
|---|-----------|-----------|-----------|
| O | -0.757980 | 1.122769  | 0.576185  |
| H | -0.132285 | 0.925663  | -0.169273 |
| H | -0.536485 | -0.415168 | 1.875218  |
| H | -1.613835 | 1.277266  | 0.155807  |
| O | 3.300468  | -0.385062 | 0.010200  |
| H | 3.595730  | -1.302440 | -0.050908 |
| O | -0.160207 | -1.070732 | 2.493208  |
| H | -0.808824 | -1.165442 | 3.202181  |
| O | 1.087229  | 0.533470  | -1.387771 |
| H | 1.435875  | 1.276245  | -1.898004 |
| H | 1.878882  | 0.145904  | -0.938034 |
| H | 3.113974  | -0.229237 | 0.969593  |
| O | 2.552735  | 0.133661  | 2.649327  |
| H | 2.277067  | 1.067390  | 2.671242  |
| H | 1.716885  | -0.355174 | 2.768459  |
| O | 1.117517  | 2.778781  | 2.247440  |
| H | 0.734204  | 3.386503  | 2.892435  |

H 0.365859 2.424996 1.738072

E = -458.519928962

G = -458.416288

E +  $\Delta G_{\text{solv}}$  = -458.519078

### H<sub>2</sub>O-6H<sub>2</sub>O-OLYP

|   |           |           |           |
|---|-----------|-----------|-----------|
| O | -0.910340 | 0.734607  | 0.547051  |
| H | -0.107592 | 0.921957  | -0.028374 |
| H | -0.578871 | -0.948791 | 1.511047  |
| H | -1.672154 | 0.820893  | -0.040954 |
| O | 3.454349  | 0.179393  | 0.671836  |
| H | 3.968587  | -0.609886 | 0.460274  |
| O | -0.186810 | -1.639287 | 2.082062  |
| H | -0.925309 | -2.052285 | 2.546874  |
| O | 1.305808  | 1.362306  | -0.832783 |
| H | 1.478517  | 2.291091  | -0.584493 |
| H | 2.066922  | 0.872689  | -0.455114 |
| H | 3.064956  | 0.011874  | 1.559885  |
| O | 2.080874  | -0.154040 | 3.147936  |
| H | 1.663498  | 0.698050  | 3.343639  |
| H | 1.330278  | -0.742201 | 2.930857  |
| O | 0.024589  | 2.550566  | 2.638382  |
| H | -0.642072 | 3.003209  | 3.171307  |
| H | -0.475753 | 1.994761  | 2.005525  |
| O | 1.589528  | 3.975139  | 0.545888  |
| H | 1.151602  | 3.654702  | 1.356939  |
| H | 2.485582  | 4.215601  | 0.815970  |

E = -534.942079141

G = -534.816880

E +  $\Delta G_{\text{solv}}$  = -534.938474

### HOOH-6H<sub>2</sub>O-OLYP

|   |           |           |           |
|---|-----------|-----------|-----------|
| O | 0.115941  | 2.219673  | 0.730372  |
| H | 0.909503  | 1.922958  | 0.218451  |
| O | -0.982522 | 1.960242  | -0.186055 |
| H | -1.328364 | 1.049566  | 0.114461  |
| O | 2.173087  | 1.419799  | -0.922999 |
| H | 2.955120  | 1.971690  | -1.042153 |
| H | 1.686826  | 1.410677  | -1.771352 |
| H | -0.682739 | 2.050501  | 3.833130  |
| O | -0.245953 | 1.341009  | 3.347496  |
| H | -0.116414 | 1.674425  | 2.432539  |
| H | -1.678081 | -0.809436 | 1.212044  |
| O | -1.850549 | -0.418248 | 0.325485  |
| H | -1.439279 | -0.988578 | -0.355148 |
| H | -1.914035 | -1.470583 | 3.510799  |
| O | -1.239296 | -1.177605 | 2.887821  |
| H | -0.897937 | -0.313327 | 3.213908  |
| H | -0.452679 | 1.646199  | -1.800948 |
| O | 0.002032  | 1.270242  | -2.601630 |
| H | -0.363503 | 1.707609  | -3.380206 |
| H | 0.291321  | -1.957011 | -1.851880 |
| O | -0.531703 | -1.460655 | -1.935928 |
| H | -0.292790 | -0.593967 | -2.319225 |

E = -610.254681483

G = -610.121954

E +  $\Delta G_{\text{solv}}$  = -610.047743

### OH<sup>•</sup>-6H<sub>2</sub>O-OLYP

|   |           |           |           |
|---|-----------|-----------|-----------|
| O | -0.788649 | 0.788627  | 0.691348  |
| H | 0.089675  | 1.069791  | 0.294100  |
| H | -0.396463 | -0.407441 | 2.128517  |
| H | -1.280373 | 0.377256  | -0.031986 |

|   |           |           |           |
|---|-----------|-----------|-----------|
| O | 3.709511  | 0.097374  | 0.637995  |
| H | 4.196264  | -0.387286 | -0.041034 |
| O | -0.130002 | -1.002801 | 2.860885  |
| H | -0.364515 | -0.525850 | 3.667707  |
| O | 1.543693  | 1.667181  | -0.281554 |
| H | 1.663083  | 2.585093  | 0.018433  |
| H | 2.335957  | 1.168095  | 0.018671  |
| H | 3.370835  | -0.589077 | 1.254315  |
| O | 2.566629  | -1.842476 | 2.364935  |
| H | 2.987186  | -2.086677 | 3.199020  |
| H | 1.645879  | -1.592565 | 2.596563  |
| O | -1.342573 | 3.372686  | 1.859197  |
| H | -2.221911 | 3.749731  | 1.728254  |
| H | -1.358048 | 2.484654  | 1.445840  |
| O | 1.088299  | 4.504551  | 0.873052  |
| H | 0.231588  | 4.227543  | 1.297637  |

E = -534.247652146

G = -534.138366

E +  $\Delta G_{\text{solv}}$  = -534.244474

### **OH<sup>-</sup>-6H<sub>2</sub>O-OLYP**

|   |           |           |           |
|---|-----------|-----------|-----------|
| O | -0.551508 | 0.656015  | 0.926765  |
| H | 0.295655  | 1.124332  | -0.495006 |
| H | 0.176964  | -0.509257 | 1.463070  |
| H | -1.491354 | 0.484405  | 0.783769  |
| O | 3.178767  | -0.931196 | 0.283031  |
| H | 2.370275  | -1.111234 | 0.816708  |
| O | 0.808536  | -1.259650 | 1.859952  |
| H | 0.335596  | -2.092521 | 1.740393  |
| O | 0.900576  | 1.403784  | -1.244176 |
| H | 1.527001  | 3.196316  | -0.320312 |
| H | 1.614614  | 0.751637  | -1.202337 |
| H | 3.544547  | -0.136691 | 0.694307  |
| O | 1.002307  | 0.317862  | 4.551045  |
| H | 0.737079  | 1.135693  | 4.092828  |
| H | 0.998141  | -0.333303 | 3.827722  |
| O | 0.061712  | 2.548884  | 2.609489  |
| H | -0.730455 | 3.061436  | 2.813666  |
| H | -0.252472 | 1.826222  | 1.950092  |
| O | 1.725792  | 3.916902  | 0.307382  |
| H | 1.294295  | 3.608776  | 1.123506  |

E = -534.399195162

G = -534.289520

E +  $\Delta G_{\text{solv}}$  = -534.451747

### **H<sub>3</sub>O<sup>+</sup>-6H<sub>2</sub>O-OLYP**

|   |           |           |           |
|---|-----------|-----------|-----------|
| O | -1.156108 | 0.730224  | 0.469511  |
| H | 0.556204  | 1.141750  | -0.591819 |
| H | -0.538433 | -1.411807 | 0.989412  |
| H | -2.039582 | 0.859086  | 0.095132  |
| O | 2.369513  | -0.496229 | 1.020257  |
| H | 1.593458  | -1.147293 | 1.111283  |
| O | 0.225271  | -1.930718 | 1.293356  |
| H | 0.091464  | -2.844339 | 1.004720  |
| O | 1.528137  | 1.172853  | -0.686007 |
| H | 1.777977  | 2.102566  | -0.533137 |
| H | 2.094956  | 0.200923  | 0.287131  |
| H | 2.461732  | 0.009631  | 1.898781  |
| O | 2.498197  | 0.996612  | 3.137530  |
| H | 1.690317  | 1.533549  | 3.254032  |
| H | 2.797551  | 0.716289  | 4.013300  |
| O | 0.153182  | 2.689439  | 2.596719  |
| H | -0.320280 | 3.209543  | 3.262278  |

|   |           |          |           |
|---|-----------|----------|-----------|
| H | -1.101748 | 1.337090 | 1.228497  |
| O | 1.895208  | 3.997406 | 0.386219  |
| H | 0.592327  | 3.341516 | 2.021195  |
| H | 2.791965  | 4.234798 | 0.668766  |
| H | 1.618348  | 4.735474 | -0.178180 |

E = -535.317940322

G = -535.181347

E +  $\Delta G_{\text{solv}}$  = -535.372624

### **1-PBEPBE**

|    |           |           |           |
|----|-----------|-----------|-----------|
| C  | 0.669348  | 0.527227  | 0.316003  |
| C  | 0.444922  | 0.547585  | 2.984657  |
| C  | 1.257692  | 0.870992  | 1.706703  |
| H  | 0.444104  | -0.547061 | 0.234606  |
| H  | 1.432787  | 0.768125  | -0.450351 |
| H  | 1.067232  | 0.809288  | 3.863479  |
| H  | 0.215334  | -0.527307 | 3.049859  |
| H  | 1.509104  | 1.949939  | 1.719499  |
| H  | 2.223692  | 0.343585  | 1.791890  |
| C  | -4.505835 | 0.959593  | -0.126964 |
| C  | -4.730200 | 0.980074  | 2.541697  |
| C  | -5.318680 | 0.636455  | 1.151013  |
| H  | -5.128140 | 0.697924  | -1.005797 |
| H  | -4.276045 | 2.034436  | -0.192239 |
| H  | -5.493649 | 0.739308  | 3.308084  |
| H  | -4.504734 | 2.054315  | 2.623106  |
| H  | -6.284529 | 1.164141  | 1.065830  |
| H  | -5.570362 | -0.442433 | 1.138289  |
| Ni | -2.030457 | 0.753524  | 1.428861  |
| N  | -0.574144 | 1.302129  | 0.060999  |
| N  | -0.827564 | 1.318248  | 3.013112  |
| N  | -3.486866 | 0.204892  | 2.796575  |
| N  | -3.233470 | 0.188722  | -0.155292 |
| H  | -3.731645 | -0.787249 | 2.656610  |
| H  | -3.497289 | -0.802026 | -0.044891 |
| H  | -0.563841 | 2.309048  | 2.902928  |
| H  | -0.329585 | 2.294342  | 0.200744  |
| C  | -2.840239 | 0.257811  | 4.142273  |
| C  | -1.687183 | 1.278966  | 4.233644  |
| C  | -2.373859 | 0.227694  | -1.375822 |
| C  | -1.220751 | 1.248824  | -1.284701 |
| H  | -2.970359 | 0.438720  | -2.283479 |
| H  | -1.966991 | -0.789921 | -1.493195 |
| H  | -0.482833 | 1.032465  | -2.080206 |
| H  | -1.604938 | 2.264607  | -1.473472 |
| H  | -2.094089 | 2.296533  | 4.351275  |
| H  | -1.090693 | 1.067774  | 5.141266  |
| H  | -2.455976 | -0.758009 | 4.330713  |
| H  | -3.578136 | 0.473890  | 4.937875  |
| N  | -4.392428 | -2.760396 | 3.443508  |
| C  | -5.093882 | -3.462024 | 4.071462  |
| C  | -5.961120 | -4.334546 | 4.852213  |
| H  | -6.276244 | -5.200050 | 4.247738  |
| H  | -5.428766 | -4.700344 | 5.744817  |
| H  | -6.859390 | -3.785457 | 5.177084  |
| N  | -4.046496 | -2.759179 | -0.954619 |
| C  | -4.657658 | -3.419231 | -1.709283 |
| C  | -5.413940 | -4.239010 | -2.646851 |
| H  | -4.878789 | -4.310681 | -3.607264 |
| H  | -5.551221 | -5.254344 | -2.241841 |
| H  | -6.405676 | -3.793941 | -2.826700 |
| N  | -0.013378 | 4.265281  | 3.811901  |
| N  | 0.328731  | 4.267667  | -0.590712 |
| C  | 0.598242  | 4.925933  | 4.565664  |
| C  | 1.028036  | 4.968617  | -1.221817 |

|   |           |           |           |
|---|-----------|-----------|-----------|
| C | 1.354914  | 5.747068  | 5.501720  |
| H | 1.839220  | 6.582584  | 4.971556  |
| H | 0.685969  | 6.157806  | 6.274885  |
| H | 2.133802  | 5.142660  | 5.993650  |
| C | 1.892617  | 5.840276  | -2.006481 |
| H | 2.791439  | 5.291811  | -2.330880 |
| H | 1.358371  | 6.202346  | -2.899476 |
| H | 2.206988  | 6.708245  | -1.405157 |
| N | -1.499878 | -1.306638 | 1.483817  |
| N | -2.560870 | 2.813894  | 1.373806  |
| C | -2.497799 | 3.984112  | 1.387060  |
| C | -1.562652 | -2.476863 | 1.470182  |
| C | -2.406319 | 5.432503  | 1.406091  |
| H | -1.941595 | 5.751618  | 2.353140  |
| H | -1.770156 | 5.763520  | 0.569282  |
| H | -3.405745 | 5.886655  | 1.313059  |
| C | -1.653731 | -3.925268 | 1.450674  |
| H | -2.294428 | -4.256289 | 2.284021  |
| H | -2.113149 | -4.244529 | 0.501097  |
| H | -0.654741 | -4.379212 | 1.549235  |

E = -2917.03580773

G = -2916.508909

E +  $\Delta G_{\text{solv}}$  = -2917.135223

### 3-PBEBPE-doublet

|    |           |           |           |
|----|-----------|-----------|-----------|
| C  | 0.698667  | 0.320872  | 0.290073  |
| C  | 0.448468  | 0.448096  | 2.887094  |
| C  | 1.345870  | 0.628912  | 1.651030  |
| H  | 0.360629  | -0.726145 | 0.235953  |
| H  | 1.442902  | 0.487989  | -0.511501 |
| H  | 1.026331  | 0.712335  | 3.792317  |
| H  | 0.098932  | -0.591764 | 2.984644  |
| H  | 1.738896  | 1.662858  | 1.643882  |
| H  | 2.222039  | -0.030872 | 1.766190  |
| C  | -4.264130 | 0.858238  | -0.210737 |
| C  | -4.512632 | 0.976057  | 2.386298  |
| C  | -5.127329 | 0.585828  | 1.031988  |
| H  | -4.808039 | 0.521940  | -1.112414 |
| H  | -4.014786 | 1.927694  | -0.293103 |
| H  | -5.218914 | 0.710212  | 3.194105  |
| H  | -4.284472 | 2.052270  | 2.430466  |
| H  | -6.070187 | 1.146451  | 0.916739  |
| H  | -5.404971 | -0.485710 | 1.054400  |
| Ni | -1.881605 | 0.826689  | 1.329063  |
| N  | -0.472468 | 1.214469  | 0.047934  |
| N  | -0.736922 | 1.352149  | 2.803952  |
| N  | -3.239005 | 0.226382  | 2.613450  |
| N  | -2.981902 | 0.095342  | -0.123409 |
| H  | -3.456808 | -0.776921 | 2.474716  |
| H  | -3.237045 | -0.890333 | 0.067275  |
| H  | -0.365372 | 2.311985  | 2.670642  |
| H  | -0.163472 | 2.200242  | 0.175831  |
| C  | -2.634503 | 0.317954  | 3.985107  |
| C  | -1.620058 | 1.447809  | 4.011712  |
| C  | -2.130151 | 0.048809  | -1.357971 |
| C  | -1.106477 | 1.170792  | -1.310526 |
| H  | -2.756987 | 0.115434  | -2.263869 |
| H  | -1.639243 | -0.937567 | -1.364459 |
| H  | -0.336677 | 1.051441  | -2.093870 |
| H  | -1.592684 | 2.149335  | -1.448129 |
| H  | -2.122923 | 2.424036  | 3.935625  |
| H  | -1.014032 | 1.434442  | 4.934574  |
| H  | -2.156526 | -0.654616 | 4.184744  |
| H  | -3.420860 | 0.466397  | 4.745123  |
| N  | -4.595425 | -2.417263 | 3.375998  |
| C  | -5.374043 | -3.046055 | 3.989622  |

|   |           |           |           |
|---|-----------|-----------|-----------|
| C | -6.339909 | -3.825490 | 4.752935  |
| H | -6.834729 | -4.564077 | 4.102223  |
| H | -5.835556 | -4.357910 | 5.575214  |
| H | -7.108755 | -3.162567 | 5.181330  |
| N | -4.172678 | -2.593621 | -0.948253 |
| C | -4.768764 | -3.310785 | -1.661132 |
| C | -5.508168 | -4.199091 | -2.548455 |
| H | -4.831192 | -4.638010 | -3.298838 |
| H | -5.974575 | -5.013901 | -1.972055 |
| H | -6.300029 | -3.639702 | -3.072015 |
| N | 0.711904  | 3.834113  | 3.610830  |
| N | 0.120695  | 4.128205  | -0.118657 |
| C | 1.202186  | 4.683098  | 4.254947  |
| C | 0.395850  | 5.202710  | -0.499360 |
| C | 1.810861  | 5.736406  | 5.055879  |
| H | 2.798192  | 6.003849  | 4.646651  |
| H | 1.170044  | 6.632660  | 5.055708  |
| H | 1.940830  | 5.395610  | 6.095565  |
| C | 0.734679  | 6.536294  | -0.972846 |
| H | 1.801973  | 6.743033  | -0.793678 |
| H | 0.534731  | 6.616687  | -2.053420 |
| H | 0.130360  | 7.290796  | -0.444028 |
| N | -1.379608 | -2.047829 | 1.499899  |
| C | -1.526966 | -3.208412 | 1.592907  |
| C | -1.712817 | -4.646091 | 1.710065  |
| H | -2.734017 | -4.857419 | 2.065363  |
| H | -1.566063 | -5.128646 | 0.730627  |
| H | -0.988546 | -5.067890 | 2.425293  |
| O | -2.568845 | 2.696234  | 1.217468  |
| H | -1.871303 | 3.348751  | 1.001408  |

E = -2860.17141471

G = -2859.671445

E +  $\Delta G_{\text{solv}}$  = -2860.282083

### 4-PBEPBE-singlet

|    |           |           |           |
|----|-----------|-----------|-----------|
| C  | 0.808178  | 0.181215  | 0.354552  |
| C  | 0.527233  | 0.302786  | 2.972144  |
| C  | 1.416581  | 0.505526  | 1.731207  |
| H  | 0.559970  | -0.883176 | 0.233439  |
| H  | 1.550888  | 0.439782  | -0.423768 |
| H  | 1.091933  | 0.648999  | 3.858237  |
| H  | 0.248152  | -0.747121 | 3.140966  |
| H  | 1.769873  | 1.553158  | 1.726352  |
| H  | 2.320078  | -0.114953 | 1.854397  |
| C  | -4.260404 | 1.040606  | -0.214768 |
| C  | -4.529794 | 1.171839  | 2.389178  |
| C  | -5.158493 | 0.858249  | 1.020687  |
| H  | -4.835109 | 0.756700  | -1.117135 |
| H  | -3.914224 | 2.077515  | -0.327963 |
| H  | -5.279578 | 0.973834  | 3.179195  |
| H  | -4.205212 | 2.219176  | 2.473403  |
| H  | -6.033604 | 1.517680  | 0.896869  |
| H  | -5.554681 | -0.174720 | 1.031430  |
| Ni | -1.866317 | 0.606114  | 1.380052  |
| N  | -0.411532 | 1.005987  | 0.099358  |
| N  | -0.700717 | 1.146338  | 2.878206  |
| N  | -3.371839 | 0.274641  | 2.658070  |
| N  | -3.079469 | 0.134148  | -0.146989 |
| H  | -3.714380 | -0.707098 | 2.534879  |
| H  | -3.448370 | -0.833514 | -0.002984 |
| H  | -0.352271 | 2.123708  | 2.724138  |
| H  | -0.144502 | 2.005113  | 0.252902  |
| C  | -2.750678 | 0.298278  | 4.026374  |
| C  | -1.593008 | 1.281139  | 4.083842  |
| C  | -2.191859 | 0.020763  | -1.353707 |

|   |           |           |           |
|---|-----------|-----------|-----------|
| C | -1.025869 | 0.994630  | -1.277303 |
| H | -2.781392 | 0.200351  | -2.269546 |
| H | -1.843539 | -1.023620 | -1.387466 |
| H | -0.256342 | 0.738350  | -2.025937 |
| H | -1.355963 | 2.027609  | -1.470388 |
| H | -1.954290 | 2.320319  | 4.075075  |
| H | -0.999367 | 1.132808  | 5.001968  |
| H | -2.422510 | -0.731919 | 4.238036  |
| H | -3.515298 | 0.562308  | 4.777593  |
| N | -4.533659 | -2.349263 | 3.152003  |
| C | -5.310661 | -3.036597 | 3.703336  |
| C | -6.270183 | -3.888627 | 4.387544  |
| H | -6.375739 | -4.849400 | 3.857758  |
| H | -5.935262 | -4.087140 | 5.418953  |
| H | -7.255683 | -3.395671 | 4.424670  |
| N | -4.069685 | -2.570265 | -0.704372 |
| C | -4.683026 | -3.304650 | -1.386526 |
| C | -5.437853 | -4.216045 | -2.231963 |
| H | -4.774385 | -4.678272 | -2.981355 |
| H | -5.896210 | -5.012519 | -1.623335 |
| H | -6.238126 | -3.669786 | -2.758039 |
| N | 0.539227  | 3.656758  | 3.445940  |
| N | -0.157252 | 3.908950  | 0.000634  |
| C | 1.032985  | 4.526645  | 4.060140  |
| C | 0.166180  | 4.957075  | -0.418180 |
| C | 1.644546  | 5.604428  | 4.821146  |
| H | 2.632848  | 5.854160  | 4.401803  |
| H | 1.005543  | 6.502068  | 4.790735  |
| H | 1.775008  | 5.299605  | 5.872482  |
| C | 0.564359  | 6.252819  | -0.937585 |
| H | 1.642399  | 6.413515  | -0.771229 |
| H | 0.360014  | 6.307228  | -2.019710 |
| H | 0.000382  | 7.052981  | -0.430042 |
| N | -1.520343 | -1.308576 | 1.508785  |
| C | -1.527284 | -2.477162 | 1.563551  |
| C | -1.518252 | -3.922286 | 1.624560  |
| H | -1.654315 | -4.255563 | 2.667093  |
| H | -2.348514 | -4.308043 | 1.009135  |
| H | -0.562442 | -4.317342 | 1.240209  |
| O | -2.367943 | 2.366018  | 1.298525  |
| H | -1.638980 | 2.961856  | 0.993261  |

E = -2859.75597895

G = -2859.243588

E +  $\Delta G_{\text{soln}}$  = -2860.079481

#### tBuOOH-6H<sub>2</sub>O-PBEPBE

|   |           |           |           |
|---|-----------|-----------|-----------|
| O | 0.444537  | -0.380035 | 0.349099  |
| H | 1.217631  | 0.270681  | 0.455510  |
| O | -0.644092 | 0.627486  | 0.213052  |
| O | 2.269595  | 1.595377  | 0.488696  |
| H | 1.861163  | 2.152034  | 1.190158  |
| H | 1.984420  | 2.021008  | -0.353553 |
| H | -1.550257 | 4.853771  | 2.709369  |
| O | -1.456049 | 4.320231  | 3.535741  |
| H | -2.337059 | 4.274049  | 3.942978  |
| H | -0.378005 | 3.010008  | 2.709716  |
| O | 0.117641  | 2.768461  | 1.887497  |
| H | -0.343114 | 1.992466  | 1.484035  |
| H | -0.384459 | 4.258698  | 1.083696  |
| O | -0.926293 | 5.079096  | 0.897992  |
| H | -0.290645 | 5.799396  | 0.741307  |
| H | 0.014228  | 1.547312  | -1.236002 |
| O | 0.568057  | 2.196341  | -1.744374 |
| H | 0.774169  | 1.766602  | -2.593286 |
| H | -1.670319 | 4.448741  | -0.851198 |

|   |           |           |           |
|---|-----------|-----------|-----------|
| O | -1.811668 | 3.919506  | -1.665836 |
| H | -0.933307 | 3.521110  | -1.844400 |
| C | -1.926310 | -0.087210 | 0.097095  |
| C | -1.941160 | -0.876240 | -1.217948 |
| H | -2.888791 | -1.430726 | -1.315139 |
| H | -1.856115 | -0.197543 | -2.083091 |
| H | -1.110375 | -1.597729 | -1.243651 |
| C | -2.120900 | -0.994675 | 1.316575  |
| H | -2.043216 | -0.413023 | 2.249791  |
| H | -3.122263 | -1.454102 | 1.278617  |
| H | -1.366190 | -1.794230 | 1.340463  |
| C | -2.937207 | 1.068452  | 0.080002  |
| H | -3.939491 | 0.659258  | -0.127300 |
| H | -2.975425 | 1.575773  | 1.058721  |
| H | -2.700957 | 1.819993  | -0.693526 |

E = -766.628185598

G = -766.396936

E +  $\Delta G_{\text{soln}}$  = -766.619359

#### tBuOH-6H<sub>2</sub>O-PBEPBE

|   |           |           |           |
|---|-----------|-----------|-----------|
| O | -0.461934 | 0.948258  | 0.176690  |
| H | 0.436304  | 1.341230  | -0.226102 |
| H | 0.051486  | -0.753515 | 0.681757  |
| H | -1.160391 | 1.103325  | -0.482562 |
| O | 3.171069  | 0.027475  | 0.792510  |
| H | 2.715883  | -0.801244 | 0.541048  |
| O | 0.556277  | -1.493939 | 1.111746  |
| O | 1.762870  | 1.879629  | -0.584120 |
| H | 1.855535  | 2.730839  | -0.078748 |
| H | 2.403792  | 1.237564  | -0.146931 |
| H | 2.830691  | 0.170169  | 1.719584  |
| O | 1.686849  | 0.103615  | 3.139456  |
| H | 1.092386  | 0.887452  | 3.133627  |
| H | 1.169028  | -0.590123 | 2.661416  |
| O | -0.130293 | 2.278924  | 2.478145  |
| H | -0.922639 | 2.558183  | 2.967921  |
| H | -0.446149 | 1.811120  | 1.643893  |
| O | 1.619114  | 4.012169  | 1.182990  |
| H | 1.013642  | 3.526939  | 1.800514  |
| H | 2.397416  | 4.265579  | 1.707874  |
| C | -0.248863 | -2.704960 | 1.098852  |
| C | 0.626279  | -3.781610 | 1.749861  |
| H | 0.895206  | -3.492264 | 2.779221  |
| H | 0.092552  | -4.745116 | 1.788647  |
| H | 1.556847  | -3.922118 | 1.175837  |
| C | -1.532394 | -2.471540 | 1.915093  |
| H | -2.138139 | -1.663247 | 1.469709  |
| H | -2.154332 | -3.382363 | 1.945294  |
| H | -1.283992 | -2.188098 | 2.951320  |
| C | -0.582635 | -3.071346 | -0.357003 |
| H | 0.341628  | -3.201170 | -0.943303 |
| H | -1.160782 | -4.009682 | -0.406332 |
| H | -1.185333 | -2.278802 | -0.833943 |

E = -691.577324185

G = -691.346295

E +  $\Delta G_{\text{soln}}$  = -691.570311

#### tBuO<sup>•</sup>-6H<sub>2</sub>O-PBEPBE

|   |           |           |           |
|---|-----------|-----------|-----------|
| O | -0.830377 | 1.121892  | 0.048579  |
| H | 0.025290  | 1.525430  | -0.374403 |
| H | -1.576664 | 1.499320  | -0.447994 |
| O | 3.347190  | 0.931925  | 0.512237  |
| H | 3.910000  | 0.222834  | 0.159689  |
| O | 1.225325  | -2.450416 | 1.622201  |

|   |           |           |           |
|---|-----------|-----------|-----------|
| O | 1.345560  | 2.240246  | -0.777229 |
| H | 1.364818  | 3.036458  | -0.184562 |
| H | 2.120767  | 1.698836  | -0.452101 |
| H | 2.889772  | 0.553013  | 1.324731  |
| O | 1.952606  | 0.042392  | 2.639721  |
| H | 1.167442  | 0.640676  | 2.700123  |
| H | 1.599353  | -0.856857 | 2.431067  |
| O | -0.183083 | 1.892704  | 2.466991  |
| H | -0.908040 | 1.983238  | 3.108345  |
| H | -0.592769 | 1.604558  | 1.579659  |
| O | 1.220425  | 4.049698  | 1.362064  |
| H | 0.748194  | 3.382870  | 1.922976  |
| H | 2.096053  | 4.162759  | 1.770935  |
| C | -0.001854 | -2.975633 | 1.294595  |
| C | -0.064784 | -4.256580 | 2.224984  |
| H | -0.022388 | -3.960215 | 3.282959  |
| H | -1.026817 | -4.752498 | 2.014519  |
| H | 0.767404  | -4.936667 | 1.994676  |
| C | -1.171068 | -2.028595 | 1.634461  |
| H | -1.095513 | -1.108981 | 1.029851  |
| H | -2.139901 | -2.510574 | 1.420205  |
| H | -1.146112 | -1.754917 | 2.702244  |
| C | -0.024751 | -3.430620 | -0.184649 |
| H | 0.814906  | -4.112107 | -0.391334 |
| H | -0.972943 | -3.942666 | -0.418063 |
| H | 0.066974  | -2.548794 | -0.838677 |

E = -690.902177348

G = -690.689036

E +  $\Delta G_{\text{soln}}$  = -690.895474

### CH<sub>3</sub>CN-PBEPBE

|   |           |          |           |
|---|-----------|----------|-----------|
| C | -1.642734 | 1.100005 | -0.020938 |
| N | -0.468987 | 1.099999 | -0.020965 |
| C | -3.102801 | 1.099997 | -0.020928 |
| H | -3.484876 | 2.118162 | -0.198621 |
| H | -3.484861 | 0.437046 | -0.813855 |
| H | -3.484917 | 0.744791 | 0.949647  |

E = -132.590353562

G = -132.570386

E +  $\Delta G_{\text{soln}}$  = -132.591818

### 6H<sub>2</sub>O-PBEPBE

|   |           |           |           |
|---|-----------|-----------|-----------|
| O | -0.621193 | 1.072687  | 0.647852  |
| H | 0.017538  | 0.879400  | -0.136373 |
| H | -0.437439 | -0.313233 | 1.793077  |
| H | -1.493703 | 1.246548  | 0.255362  |
| O | 3.174159  | -0.341864 | 0.054520  |
| H | 3.409262  | -1.282431 | -0.015590 |
| O | -0.061451 | -0.990644 | 2.414847  |
| H | -0.677021 | -1.050388 | 3.164350  |
| O | 1.086757  | 0.553300  | -1.231848 |
| H | 1.415391  | 1.331978  | -1.713590 |
| H | 1.909022  | 0.152377  | -0.777081 |
| H | 2.971520  | -0.165990 | 1.038840  |
| O | 2.458252  | 0.191099  | 2.527816  |
| H | 2.148785  | 1.131999  | 2.509931  |
| H | 1.618844  | -0.323319 | 2.650401  |
| O | 1.130175  | 2.637966  | 2.131635  |
| H | 0.755104  | 3.171326  | 2.852116  |
| H | 0.362811  | 2.248579  | 1.639113  |

E = -458.178273284

G = -458.071443

E +  $\Delta G_{\text{soln}}$  = -458.180543

### H<sub>2</sub>O-6H<sub>2</sub>O-PBEPBE

|   |           |           |           |
|---|-----------|-----------|-----------|
| O | -0.778181 | 0.741259  | 0.637709  |
| H | 0.051367  | 0.948084  | 0.009880  |
| H | -0.492157 | -0.810845 | 1.460193  |
| H | -1.577606 | 0.866795  | 0.097890  |
| O | 3.289379  | 0.268533  | 0.698430  |
| H | 3.746238  | -0.562047 | 0.484657  |
| O | -0.090337 | -1.525039 | 2.025158  |
| H | -0.815888 | -1.918910 | 2.537465  |
| O | 1.272754  | 1.344346  | -0.711809 |
| H | 1.429452  | 2.291869  | -0.451923 |
| H | 2.052556  | 0.855853  | -0.306606 |
| H | 2.866459  | 0.138660  | 1.606264  |
| O | 1.950080  | 0.053236  | 3.006940  |
| H | 1.458476  | 0.902148  | 3.079279  |
| H | 1.241507  | -0.614587 | 2.805644  |
| O | 0.196974  | 2.354857  | 2.553391  |
| H | -0.423510 | 2.756105  | 3.185665  |
| H | -0.350887 | 1.816471  | 1.904332  |
| O | 1.542785  | 3.792585  | 0.571302  |
| H | 1.132672  | 3.435477  | 1.399904  |
| H | 2.464058  | 4.005498  | 0.799989  |

E = -534.546326505

G = -534.416891

E +  $\Delta G_{\text{soln}}$  = -534.546723

### HOOH-6H<sub>2</sub>O-PBEPBE

|   |           |           |           |
|---|-----------|-----------|-----------|
| O | 0.553326  | 1.325562  | 0.709562  |
| H | 1.274427  | 1.721598  | 0.129750  |
| O | -0.665623 | 1.747186  | -0.010353 |
| H | -1.270761 | 0.891617  | 0.160913  |
| O | 2.337269  | 2.092271  | -1.157681 |
| H | 2.576886  | 3.020834  | -1.318961 |
| H | 1.745309  | 1.819094  | -1.904790 |
| H | -0.668023 | 2.040624  | 3.559581  |
| O | -0.162380 | 1.239976  | 3.338321  |
| H | 0.193199  | 1.399219  | 2.422151  |
| H | -1.925760 | -0.721690 | 1.192968  |
| O | -2.056658 | -0.348381 | 0.272693  |
| H | -1.629694 | -0.968562 | -0.374654 |
| H | -2.238968 | -1.235913 | 3.458046  |
| O | -1.528511 | -1.053415 | 2.820893  |
| H | -1.057310 | -0.231288 | 3.143233  |
| H | -0.292373 | 1.437977  | -1.579243 |
| O | 0.126585  | 1.113859  | -2.450488 |
| H | -0.400461 | 1.488626  | -3.177736 |
| H | 0.113119  | -2.102201 | -1.601935 |
| O | -0.646213 | -1.532629 | -1.813944 |
| H | -0.259396 | -0.689187 | -2.159346 |

E = -609.601178968

G = -609.471739

E +  $\Delta G_{\text{soln}}$  = -609.601690

### OH<sup>•</sup>-6H<sub>2</sub>O-PBEPBE

|   |           |           |           |
|---|-----------|-----------|-----------|
| O | -0.780434 | 0.748877  | 0.640586  |
| H | 0.047939  | 0.966402  | 0.021050  |
| H | -0.477868 | -0.805412 | 1.474354  |
| H | -1.577809 | 0.855071  | 0.093483  |
| O | 3.279109  | 0.280205  | 0.660399  |
| H | 3.723088  | -0.552247 | 0.427843  |
| O | -0.060406 | -1.505719 | 2.043214  |
| H | -0.776199 | -1.918113 | 2.554700  |
| O | 1.276485  | 1.376733  | -0.699017 |



|   |           |           |           |
|---|-----------|-----------|-----------|
| H | 1.425725  | 2.329827  | -0.484620 |
| H | 2.069236  | 0.898986  | -0.294920 |
| H | 2.879433  | 0.152697  | 1.578682  |
| O | 1.980997  | 0.084731  | 2.990645  |
| H | 1.499260  | 0.937015  | 3.070140  |
| H | 1.265738  | -0.580158 | 2.803896  |
| O | 0.165068  | 2.385780  | 2.535119  |
| H | -0.442715 | 2.756007  | 3.198369  |
| H | -0.380548 | 1.821591  | 1.905150  |
| O | 1.392076  | 3.943137  | 0.618665  |
| H | 1.037892  | 3.482999  | 1.444157  |

E = -533.848847888

G = -533.733885

E +  $\Delta G_{\text{soln}}$  = -533.847963

### OH<sup>-</sup>-6H<sub>2</sub>O-PBEPBE

OH<sup>-</sup>-6H<sub>2</sub>O-PBEPBE

|   |           |           |           |
|---|-----------|-----------|-----------|
| O | -0.679164 | 0.649550  | 0.880815  |
| H | 0.536328  | 1.096401  | -0.331272 |
| H | -0.152337 | -0.594902 | 1.357003  |
| H | -1.589360 | 0.664334  | 0.542308  |
| O | 2.941858  | -0.460801 | 0.811840  |
| H | 2.156832  | -1.050622 | 0.905466  |
| O | 0.427373  | -1.407611 | 1.757638  |
| H | -0.155866 | -2.179350 | 1.835180  |
| O | 1.352975  | 1.358617  | -0.847863 |
| H | 1.427972  | 3.154236  | -0.223454 |
| H | 2.057414  | 0.822338  | -0.410097 |
| H | 2.912965  | 0.009212  | 1.680770  |
| O | 1.934527  | 0.377477  | 3.413577  |
| H | 1.398093  | 1.183390  | 3.191652  |
| H | 1.350229  | -0.358477 | 3.111475  |
| O | 0.169562  | 2.391877  | 2.502472  |
| H | -0.524445 | 2.666254  | 3.124488  |
| H | -0.286927 | 1.709942  | 1.832096  |
| O | 1.319086  | 3.987453  | 0.303028  |
| H | 0.948950  | 3.639094  | 1.144776  |

E = -534.011007562

G = -533.895780

E +  $\Delta G_{\text{soln}}$  = -534.070545

### H<sub>3</sub>O<sup>+</sup>-6H<sub>2</sub>O-PBEPBE

|   |           |           |           |
|---|-----------|-----------|-----------|
| O | -1.058234 | 0.653880  | 0.531074  |
| H | 0.399599  | 1.093817  | -0.611792 |
| H | -0.464815 | -1.015747 | 1.092404  |
| H | -1.979069 | 0.748097  | 0.225395  |
| O | 2.378239  | -0.391489 | 0.852778  |
| H | 1.571785  | -1.013553 | 1.092626  |
| O | 0.246471  | -1.615517 | 1.434149  |
| H | 0.020696  | -2.534833 | 1.206034  |
| O | 1.369652  | 1.197136  | -0.782785 |
| H | 1.596167  | 2.119290  | -0.510210 |
| H | 2.011887  | 0.278765  | 0.084049  |
| H | 2.560979  | 0.194790  | 1.653542  |
| O | 2.565994  | 1.489021  | 2.739246  |
| H | 1.633411  | 1.692755  | 3.001790  |
| H | 3.086483  | 1.388214  | 3.557846  |
| O | -0.049024 | 2.458426  | 2.398462  |
| H | -0.599075 | 2.952323  | 3.034654  |
| H | -0.925491 | 1.309414  | 1.266786  |
| O | 1.931448  | 3.505927  | 0.783208  |
| H | 0.421521  | 3.129758  | 1.840029  |
| H | 2.630129  | 3.154168  | 1.378655  |

H 2.230902 4.383721 0.481035

E = -534.918298298

G = -534.774995

E +  $\Delta G_{\text{soln}}$  = -534.979504

### 1-BHLYP

|    |           |           |           |
|----|-----------|-----------|-----------|
| C  | 0.634650  | 0.522509  | 0.300576  |
| C  | 0.431606  | 0.523245  | 2.953218  |
| C  | 1.229468  | 0.850366  | 1.680133  |
| H  | 0.409880  | -0.534442 | 0.215963  |
| H  | 1.384210  | 0.760284  | -0.454296 |
| H  | 1.055813  | 0.765972  | 3.813229  |
| H  | 0.200628  | -0.534650 | 3.006369  |
| H  | 1.480859  | 1.912074  | 1.699032  |
| H  | 2.178265  | 0.323600  | 1.752802  |
| C  | -4.492220 | 0.983790  | -0.096679 |
| C  | -4.695203 | 0.984616  | 2.555968  |
| C  | -5.290132 | 0.656875  | 1.176429  |
| H  | -5.116428 | 0.741089  | -0.956696 |
| H  | -4.261095 | 2.041648  | -0.149893 |
| H  | -5.444772 | 0.746959  | 3.310869  |
| H  | -4.470245 | 2.041529  | 2.640585  |
| H  | -6.238812 | 1.183853  | 1.103770  |
| H  | -5.541730 | -0.404787 | 1.157588  |
| Ni | -2.030301 | 0.753451  | 1.428279  |
| N  | -0.594671 | 1.298180  | 0.057136  |
| N  | -0.822828 | 1.295649  | 3.003085  |
| N  | -3.466014 | 0.208715  | 2.799313  |
| N  | -3.237882 | 0.211225  | -0.146453 |
| H  | -3.707661 | -0.762341 | 2.654158  |
| H  | -3.497250 | -0.760040 | -0.038805 |
| H  | -0.563547 | 2.266957  | 2.895622  |
| H  | -0.353191 | 2.269297  | 0.202134  |
| C  | -2.824141 | 0.255198  | 4.129611  |
| C  | -1.660911 | 1.249612  | 4.219106  |
| C  | -2.399801 | 0.257006  | -1.362474 |
| C  | -1.236529 | 1.251399  | -1.273165 |
| H  | -2.993554 | 0.487448  | -2.245717 |
| H  | -2.012104 | -0.747533 | -1.497985 |
| H  | -0.514460 | 1.020619  | -2.054909 |
| H  | -1.599096 | 2.255885  | -1.466611 |
| H  | -2.048636 | 2.254110  | 4.354822  |
| H  | -1.067158 | 1.019036  | 5.102313  |
| H  | -2.461524 | -0.749324 | 4.322798  |
| H  | -3.546192 | 0.485763  | 4.911434  |
| N  | -4.368476 | -2.777871 | 3.480804  |
| C  | -5.062359 | -3.444295 | 4.106991  |
| C  | -5.941149 | -4.289932 | 4.903053  |
| H  | -6.263730 | -5.143284 | 4.315889  |
| H  | -5.414580 | -4.642438 | 5.783737  |
| H  | -6.813123 | -3.724078 | 5.213912  |
| N  | -4.007832 | -2.771471 | -0.995908 |
| C  | -4.589865 | -3.421781 | -1.741611 |
| C  | -5.326918 | -4.246056 | -2.689493 |
| H  | -4.773436 | -4.322045 | -3.619551 |
| H  | -5.471449 | -5.240269 | -2.279997 |
| H  | -6.296071 | -3.800585 | -2.888136 |
| N  | -0.052954 | 4.277695  | 3.853016  |
| N  | 0.305979  | 4.284871  | -0.627421 |
| C  | 0.527667  | 4.928805  | 4.599120  |
| C  | 0.998859  | 4.950774  | -1.255271 |
| C  | 1.262674  | 5.754657  | 5.547215  |
| H  | 1.733638  | 6.582658  | 5.027993  |
| H  | 0.584519  | 6.145222  | 6.298705  |
| H  | 2.028602  | 5.160935  | 6.035083  |
| C  | 1.876374  | 5.795739  | -2.053455 |



|   |           |           |           |
|---|-----------|-----------|-----------|
| H | 2.749494  | 5.230601  | -2.362394 |
| H | 1.349462  | 6.144763  | -2.935320 |
| H | 2.197179  | 6.651372  | -1.468643 |
| N | -1.505169 | -1.460033 | 1.464606  |
| N | -2.555291 | 2.967186  | 1.391726  |
| C | -2.473064 | 4.109080  | 1.403703  |
| C | -1.587187 | -2.601931 | 1.451981  |
| C | -2.357062 | 5.555907  | 1.419938  |
| H | -1.901652 | 5.859411  | 2.356449  |
| H | -1.722941 | 5.864199  | 0.595660  |
| H | -3.337665 | 6.009432  | 1.321608  |
| C | -1.702914 | -4.048764 | 1.434920  |
| H | -2.343149 | -4.356970 | 2.254498  |
| H | -2.151260 | -4.352406 | 0.495059  |
| H | -0.723030 | -4.502182 | 1.540633  |

E = -2918.18543726

G = -2917.617312

E +  $\Delta G_{\text{soln}}$  = -2918.284094

### 3-BHLYP-Doublet

|    |           |           |           |
|----|-----------|-----------|-----------|
| C  | 0.678659  | 0.325352  | 0.291238  |
| C  | 0.413045  | 0.472416  | 2.880747  |
| C  | 1.301050  | 0.648812  | 1.649532  |
| H  | 0.397893  | -0.718313 | 0.219098  |
| H  | 1.409844  | 0.534192  | -0.487105 |
| H  | 0.971212  | 0.787412  | 3.758852  |
| H  | 0.111279  | -0.559253 | 3.014817  |
| H  | 1.664860  | 1.675549  | 1.634166  |
| H  | 2.177354  | 0.018256  | 1.773602  |
| C  | -4.308844 | 0.846585  | -0.242820 |
| C  | -4.569951 | 0.990508  | 2.338872  |
| C  | -5.165561 | 0.584718  | 0.993139  |
| H  | -4.840063 | 0.492992  | -1.123850 |
| H  | -4.081354 | 1.899443  | -0.341035 |
| H  | -5.269522 | 0.725607  | 3.128681  |
| H  | -4.358334 | 2.050924  | 2.371578  |
| H  | -6.098807 | 1.127506  | 0.868487  |
| H  | -5.430255 | -0.473313 | 1.025133  |
| Ni | -1.939927 | 0.813121  | 1.306311  |
| N  | -0.516633 | 1.163399  | 0.052241  |
| N  | -0.793504 | 1.318487  | 2.767997  |
| N  | -3.302261 | 0.259283  | 2.582324  |
| N  | -3.028248 | 0.104671  | -0.145926 |
| H  | -3.510847 | -0.725785 | 2.459984  |
| H  | -3.270242 | -0.862035 | 0.043382  |
| H  | -0.462016 | 2.260792  | 2.592173  |
| H  | -0.237780 | 2.132454  | 0.189581  |
| C  | -2.718542 | 0.367367  | 3.944578  |
| C  | -1.663094 | 1.446611  | 3.964851  |
| C  | -2.184019 | 0.057459  | -1.366907 |
| C  | -1.122218 | 1.130199  | -1.303135 |
| H  | -2.795898 | 0.168698  | -2.257596 |
| H  | -1.735290 | -0.929650 | -1.399530 |
| H  | -0.356807 | 0.972654  | -2.058946 |
| H  | -1.559488 | 2.109009  | -1.462556 |
| H  | -2.122001 | 2.425233  | 3.896105  |
| H  | -1.066673 | 1.406519  | 4.871937  |
| H  | -2.290555 | -0.601338 | 4.180468  |
| H  | -3.495987 | 0.569654  | 4.675850  |
| N  | -4.503893 | -2.464077 | 3.437448  |
| C  | -5.261221 | -3.053568 | 4.067293  |
| C  | -6.221326 | -3.800357 | 4.868250  |
| H  | -6.700364 | -4.558737 | 4.257979  |
| H  | -5.714284 | -4.279190 | 5.699420  |
| H  | -6.978800 | -3.126918 | 5.255559  |
| N  | -4.013063 | -2.713453 | -0.949046 |

|   |           |           |           |
|---|-----------|-----------|-----------|
| C | -4.598320 | -3.404338 | -1.654579 |
| C | -5.339791 | -4.279311 | -2.552202 |
| H | -4.667776 | -4.704839 | -3.290155 |
| H | -5.802501 | -5.081564 | -1.987125 |
| H | -6.112813 | -3.713043 | -3.061171 |
| N | 0.773028  | 3.690075  | 3.738201  |
| N | 0.141038  | 4.075826  | -0.178052 |
| C | 1.275586  | 4.506348  | 4.368407  |
| C | 0.407814  | 5.134435  | -0.529009 |
| C | 1.912911  | 5.541108  | 5.170326  |
| H | 2.881676  | 5.788974  | 4.749510  |
| H | 1.291438  | 6.430311  | 5.184536  |
| H | 2.048554  | 5.187069  | 6.186885  |
| C | 0.744505  | 6.477513  | -0.976622 |
| H | 1.791831  | 6.679016  | -0.777647 |
| H | 0.561844  | 6.565131  | -2.042522 |
| H | 0.133253  | 7.203133  | -0.450278 |
| N | -1.443311 | -1.769141 | 1.500826  |
| C | -1.586809 | -2.904811 | 1.568217  |
| C | -1.779090 | -4.341823 | 1.655314  |
| H | -2.564004 | -4.548820 | 2.374953  |
| H | -2.072232 | -4.723620 | 0.683255  |
| H | -0.858396 | -4.821097 | 1.971243  |
| O | -2.606782 | 2.614397  | 1.195950  |
| H | -1.997307 | 3.302395  | 0.940649  |

E = -2861.19946118

G =

E +  $\Delta G_{\text{soln}}$  = -2861.314249

### 4-BHLYP-singlet

|    |           |           |           |
|----|-----------|-----------|-----------|
| C  | 0.754599  | 0.170251  | 0.372378  |
| C  | 0.452988  | 0.320985  | 2.963362  |
| C  | 1.353886  | 0.487422  | 1.741070  |
| H  | 0.504513  | -0.875394 | 0.253068  |
| H  | 1.485277  | 0.424267  | -0.392136 |
| H  | 0.990937  | 0.686189  | 3.834517  |
| H  | 0.172995  | -0.707362 | 3.148822  |
| H  | 1.723503  | 1.511660  | 1.730755  |
| H  | 2.227648  | -0.143950 | 1.876956  |
| C  | -4.263430 | 1.036406  | -0.251956 |
| C  | -4.558276 | 1.183405  | 2.328191  |
| C  | -5.164242 | 0.860752  | 0.966199  |
| H  | -4.806301 | 0.713760  | -1.137671 |
| H  | -3.950540 | 2.061522  | -0.386036 |
| H  | -5.289339 | 0.951950  | 3.099781  |
| H  | -4.273268 | 2.221673  | 2.418407  |
| H  | -6.032066 | 1.500177  | 0.830936  |
| H  | -5.542748 | -0.161455 | 0.980207  |
| Ni | -1.904026 | 0.644619  | 1.355488  |
| N  | -0.455794 | 0.995591  | 0.120732  |
| N  | -0.766369 | 1.154781  | 2.824974  |
| N  | -3.373650 | 0.328201  | 2.591669  |
| N  | -3.063035 | 0.169574  | -0.140554 |
| H  | -3.689099 | -0.635291 | 2.472844  |
| H  | -3.413851 | -0.775723 | 0.015021  |
| H  | -0.415191 | 2.098079  | 2.652677  |
| H  | -0.173554 | 1.963629  | 0.272639  |
| C  | -2.800387 | 0.367309  | 3.966981  |
| C  | -1.640351 | 1.327914  | 4.023074  |
| C  | -2.195655 | 0.043515  | -1.345342 |
| C  | -1.027577 | 0.994466  | -1.259769 |
| H  | -2.779115 | 0.232467  | -2.241447 |
| H  | -1.863168 | -0.987538 | -1.384022 |
| H  | -0.256317 | 0.727839  | -1.976372 |
| H  | -1.335981 | 2.013224  | -1.463726 |
| H  | -1.982459 | 2.354849  | 4.002578  |

|   |           |           |           |
|---|-----------|-----------|-----------|
| H | -1.054780 | 1.184395  | 4.925646  |
| H | -2.492479 | -0.644426 | 4.206221  |
| H | -3.570516 | 0.652315  | 4.677434  |
| N | -4.455221 | -2.361647 | 3.195474  |
| C | -5.204255 | -3.030171 | 3.754298  |
| C | -6.152603 | -3.875099 | 4.465488  |
| H | -6.244967 | -4.831866 | 3.961659  |
| H | -5.808627 | -4.038730 | 5.481873  |
| H | -7.124433 | -3.392266 | 4.492081  |
| N | -3.988954 | -2.601073 | -0.726544 |
| C | -4.577084 | -3.327395 | -1.395287 |
| C | -5.319342 | -4.247497 | -2.244843 |
| H | -4.648615 | -4.705201 | -2.965125 |
| H | -5.776046 | -5.023063 | -1.638460 |
| H | -6.097371 | -3.708304 | -2.776077 |
| N | 0.617578  | 3.594005  | 3.506508  |
| N | -0.235525 | 3.937634  | -0.009723 |
| C | 1.139184  | 4.422535  | 4.106149  |
| C | 0.085099  | 4.969045  | -0.399477 |
| C | 1.800089  | 5.471385  | 4.868835  |
| H | 2.766780  | 5.693167  | 4.428274  |
| H | 1.189443  | 6.368550  | 4.865233  |
| H | 1.944205  | 5.144053  | 5.893542  |
| C | 0.489543  | 6.274192  | -0.895796 |
| H | 1.553509  | 6.414163  | -0.732537 |
| H | 0.278920  | 6.343339  | -1.958424 |
| H | -0.060371 | 7.049730  | -0.371785 |
| N | -1.553734 | -1.298605 | 1.507259  |
| C | -1.581140 | -2.439923 | 1.576336  |
| C | -1.603107 | -3.885884 | 1.659114  |
| H | -1.677302 | -4.186289 | 2.699804  |
| H | -2.468458 | -4.244473 | 1.110489  |
| H | -0.694344 | -4.292468 | 1.224548  |
| O | -2.391127 | 2.343208  | 1.266426  |
| H | -1.704526 | 2.933356  | 0.931607  |

E = -2860.72068969

G = -2860.165364

E +  $\Delta G_{\text{soln}}$  = -2861.048289

#### tBuOOH-6H<sub>2</sub>O-BHLYP

|   |           |           |           |
|---|-----------|-----------|-----------|
| O | 0.403758  | -0.390325 | 0.265650  |
| H | 1.169184  | 0.200033  | 0.418936  |
| O | -0.644089 | 0.580299  | 0.188618  |
| O | 2.254126  | 1.581343  | 0.503667  |
| H | 1.886682  | 2.126550  | 1.204325  |
| H | 2.026397  | 2.025065  | -0.317968 |
| H | -1.664394 | 4.858700  | 2.676666  |
| O | -1.631307 | 4.278124  | 3.443485  |
| H | -2.420756 | 4.414206  | 3.957917  |
| H | -0.411840 | 2.971191  | 2.688487  |
| O | 0.103216  | 2.752107  | 1.904136  |
| H | -0.326330 | 2.006609  | 1.470506  |
| H | -0.318420 | 4.345826  | 1.088204  |
| O | -0.827479 | 5.148432  | 0.894703  |
| H | -0.205014 | 5.857217  | 0.754628  |
| H | 0.037249  | 1.562762  | -1.283437 |
| O | 0.577113  | 2.198010  | -1.771541 |
| H | 0.770777  | 1.809441  | -2.621072 |
| H | -1.651922 | 4.482361  | -0.842301 |
| O | -1.784962 | 3.931301  | -1.615418 |
| H | -0.927068 | 3.550432  | -1.808799 |
| C | -1.913704 | -0.106243 | 0.102269  |
| C | -1.971752 | -0.880744 | -1.205554 |
| H | -2.924932 | -1.395769 | -1.288813 |
| H | -1.879891 | -0.207474 | -2.054354 |
| H | -1.177071 | -1.617296 | -1.252899 |

|   |           |           |           |
|---|-----------|-----------|-----------|
| C | -2.083655 | -1.017156 | 1.307515  |
| H | -1.973506 | -0.453200 | 2.229961  |
| H | -3.077733 | -1.456164 | 1.293447  |
| H | -1.351108 | -1.815780 | 1.303419  |
| C | -2.919835 | 1.034746  | 0.119676  |
| H | -3.918565 | 0.633468  | -0.028532 |
| H | -2.905264 | 1.549666  | 1.077215  |
| H | -2.720128 | 1.762598  | -0.661937 |

E = -767.071656392

G = -766.823261

E +  $\Delta G_{\text{soln}}$  = -767.062252

#### tBuOH-6H<sub>2</sub>O-BHLYP

|   |           |           |           |
|---|-----------|-----------|-----------|
| O | -0.571204 | 0.992247  | 0.168667  |
| H | 0.275752  | 1.330217  | -0.232418 |
| H | -0.039571 | -0.754082 | 0.755052  |
| H | -1.265550 | 1.142356  | -0.467481 |
| O | 3.064432  | -0.154732 | 0.707963  |
| H | 2.442873  | -0.875291 | 0.587419  |
| O | 0.463426  | -1.464847 | 1.172741  |
| O | 1.735035  | 1.863354  | -0.640686 |
| H | 1.898239  | 2.687546  | -0.165530 |
| H | 2.355515  | 1.209470  | -0.279615 |
| H | 2.929277  | 0.091794  | 1.630637  |
| O | 1.710882  | 0.156972  | 3.197758  |
| H | 1.155802  | 0.939791  | 3.197313  |
| H | 1.189019  | -0.523021 | 2.761564  |
| O | -0.125942 | 2.342478  | 2.526781  |
| H | -0.874321 | 2.645378  | 3.033749  |
| H | -0.466136 | 1.894557  | 1.734292  |
| O | 1.752900  | 3.981933  | 1.203302  |
| H | 1.146609  | 3.549197  | 1.815756  |
| H | 2.497827  | 4.294294  | 1.708493  |
| C | -0.250300 | -2.701497 | 1.103340  |
| C | 0.646474  | -3.728416 | 1.773862  |
| H | 0.845731  | -3.445014 | 2.803850  |
| H | 0.175882  | -4.707879 | 1.772097  |
| H | 1.596227  | -3.802906 | 1.251273  |
| C | -1.570400 | -2.560287 | 1.852812  |
| H | -2.192421 | -1.792119 | 1.397340  |
| H | -2.127714 | -3.493664 | 1.838536  |
| H | -1.390476 | -2.284013 | 2.888293  |
| C | -0.489668 | -3.059145 | -0.358718 |
| H | 0.454680  | -3.128511 | -0.891441 |
| H | -1.005225 | -4.012346 | -0.446005 |
| H | -1.100675 | -2.302479 | -0.847036 |

E = -691.993330626

G = -691.744974

E +  $\Delta G_{\text{soln}}$  = -691.986568

#### tBuO<sup>•</sup>-6H<sub>2</sub>O-BHLYP

|   |           |           |           |
|---|-----------|-----------|-----------|
| O | -0.933420 | 0.978758  | -0.008920 |
| H | -0.112758 | 1.279993  | -0.454151 |
| H | -1.659505 | 1.216563  | -0.578523 |
| O | 3.439987  | 1.487590  | 0.959376  |
| H | 4.375566  | 1.324829  | 1.034120  |
| O | 1.129559  | -2.386910 | 1.490588  |
| O | 1.340667  | 2.015343  | -0.960697 |
| H | 1.358741  | 2.829052  | -0.437602 |
| H | 2.133849  | 1.560231  | -0.665919 |
| H | 2.988059  | 0.920085  | 1.613071  |
| O | 1.901457  | 0.127741  | 2.702159  |
| H | 1.116803  | 0.683940  | 2.766494  |
| H | 1.609985  | -0.736415 | 2.399379  |

|   |           |           |           |
|---|-----------|-----------|-----------|
| O | -0.276118 | 1.933567  | 2.443565  |
| H | -0.976337 | 2.118707  | 3.062711  |
| H | -0.680593 | 1.625598  | 1.612373  |
| O | 1.660451  | 3.754549  | 1.208800  |
| H | 1.010367  | 3.344421  | 1.785016  |
| H | 2.465940  | 3.244214  | 1.328243  |
| C | -0.105008 | -2.997726 | 1.287407  |
| C | 0.004083  | -4.318116 | 2.067890  |
| H | 0.172852  | -4.130154 | 3.123839  |
| H | -0.929598 | -4.863056 | 1.959056  |
| H | 0.815868  | -4.926641 | 1.683395  |
| C | -1.235554 | -2.126923 | 1.824464  |
| H | -1.258338 | -1.176310 | 1.298964  |
| H | -2.196426 | -2.617779 | 1.688992  |
| H | -1.095596 | -1.938491 | 2.886008  |
| C | -0.258538 | -3.267664 | -0.209259 |
| H | 0.563843  | -3.876077 | -0.572230 |
| H | -1.193840 | -3.787969 | -0.398824 |
| H | -0.271437 | -2.332224 | -0.760986 |

E = -691.321607389

G = -691.091312

E +  $\Delta G_{\text{solv}}$  = -691.312793

### CH<sub>3</sub>CN-BHLYP

|   |           |          |           |
|---|-----------|----------|-----------|
| C | -1.646460 | 1.099997 | -0.020946 |
| N | -0.499579 | 1.100006 | -0.020947 |
| C | -3.103037 | 1.099993 | -0.020939 |
| H | -3.473359 | 2.104650 | -0.196261 |
| H | -3.473365 | 0.445844 | -0.803337 |
| H | -3.473379 | 0.749509 | 0.936770  |

E = -132.678684974

G = -132.655714

E +  $\Delta G_{\text{solv}}$  = -132.680543

### 6H<sub>2</sub>O-BHLYP

|   |           |           |           |
|---|-----------|-----------|-----------|
| O | -0.684769 | 1.095074  | 0.620587  |
| H | -0.060148 | 0.910700  | -0.116302 |
| H | -0.469871 | -0.306826 | 1.856783  |
| H | -1.537837 | 1.257982  | 0.227669  |
| O | 3.218867  | -0.405295 | 0.029558  |
| H | 3.574440  | -1.286747 | -0.029510 |
| O | -0.103369 | -0.942973 | 2.483377  |
| H | -0.756699 | -1.096797 | 3.158720  |
| O | 1.105383  | 0.583169  | -1.277117 |
| H | 1.447319  | 1.309635  | -1.790862 |
| H | 1.880544  | 0.149933  | -0.866840 |
| H | 3.043024  | -0.220375 | 0.974729  |
| O | 2.478208  | 0.176870  | 2.543389  |
| H | 2.199383  | 1.098982  | 2.560698  |
| H | 1.670299  | -0.325660 | 2.700194  |
| O | 1.083541  | 2.626214  | 2.203862  |
| H | 0.735146  | 3.256548  | 2.826688  |
| H | 0.343350  | 2.268957  | 1.699753  |

E = -458.426816373

G = -458.312483

E +  $\Delta G_{\text{solv}}$  = -458.428429

### H<sub>2</sub>O-6H<sub>2</sub>O-BHLYP

|   |           |           |           |
|---|-----------|-----------|-----------|
| O | -0.772920 | 0.735666  | 0.592945  |
| H | -0.018173 | 0.992315  | -0.007133 |
| H | -0.154574 | -0.837743 | 1.364331  |
| H | -1.574533 | 0.775520  | 0.078062  |

|   |           |           |           |
|---|-----------|-----------|-----------|
| O | 2.918654  | -0.333599 | 0.663086  |
| H | 2.360221  | -1.108224 | 0.733649  |
| O | 0.400993  | -1.487581 | 1.817332  |
| H | -0.118792 | -2.274996 | 1.948988  |
| O | 1.328100  | 1.424789  | -0.749686 |
| H | 1.559230  | 2.318882  | -0.468821 |
| H | 2.014837  | 0.836693  | -0.394282 |
| H | 2.891872  | 0.041026  | 1.553129  |
| O | 2.038433  | 0.402196  | 3.250017  |
| H | 1.478978  | 1.181210  | 3.210104  |
| H | 1.446470  | -0.342018 | 3.114866  |
| O | 0.077540  | 2.462745  | 2.568117  |
| H | -0.564664 | 2.852377  | 3.155192  |
| H | -0.399998 | 1.897249  | 1.939098  |
| O | 1.634931  | 3.837575  | 0.650806  |
| H | 1.170281  | 3.526151  | 1.435972  |
| H | 2.449302  | 4.240114  | 0.937981  |

E = -534.834421860

G = -534.693631

E +  $\Delta G_{\text{solv}}$  = -534.834855

### HOOH-6H<sub>2</sub>O-BHLYP

|   |           |           |           |
|---|-----------|-----------|-----------|
| O | 0.539753  | 1.090195  | 0.487430  |
| H | 1.240356  | 1.525885  | -0.032866 |
| O | -0.642613 | 1.695699  | -0.038842 |
| H | -1.313287 | 0.978292  | 0.130659  |
| O | 2.287977  | 2.010128  | -1.344500 |
| H | 2.727438  | 2.848650  | -1.450879 |
| H | 1.717719  | 1.869224  | -2.109744 |
| H | -0.228601 | 1.768467  | 3.590320  |
| O | -0.036381 | 0.911164  | 3.220792  |
| H | 0.272661  | 1.058464  | 2.317809  |
| H | -2.340109 | -0.632919 | 1.149815  |
| O | -2.249988 | -0.317583 | 0.238209  |
| H | -1.732205 | -0.965938 | -0.252016 |
| H | -2.032933 | -1.662976 | 3.418520  |
| O | -2.133182 | -0.848690 | 2.935262  |
| H | -1.388164 | -0.273301 | 3.166354  |
| H | -0.428277 | 1.543547  | -1.863650 |
| O | 0.003286  | 1.279325  | -2.691595 |
| H | -0.551465 | 1.557749  | -3.415046 |
| H | 0.475386  | -0.869324 | -0.572666 |
| O | -0.055975 | -1.332554 | -1.221620 |
| H | -0.013406 | -0.778324 | -2.002766 |

E = -609.915841150

G = -609.774492

E +  $\Delta G_{\text{solv}}$  = -609.914059

### OH<sup>•</sup>-6H<sub>2</sub>O-BHLYP

|   |           |           |           |
|---|-----------|-----------|-----------|
| O | -0.787359 | 0.750249  | 0.596710  |
| H | -0.032781 | 1.021595  | 0.008215  |
| H | -0.142856 | -0.830626 | 1.356297  |
| H | -1.582928 | 0.769102  | 0.071204  |
| O | 2.929150  | -0.270360 | 0.647871  |
| H | 2.379370  | -1.051050 | 0.721258  |
| O | 0.433901  | -1.465476 | 1.802426  |
| H | -0.061529 | -2.268174 | 1.936220  |
| O | 1.329626  | 1.470728  | -0.726463 |
| H | 1.572510  | 2.371092  | -0.494950 |
| H | 2.023866  | 0.888562  | -0.369768 |
| H | 2.917728  | 0.094369  | 1.542426  |
| O | 2.049504  | 0.440421  | 3.235042  |
| H | 1.492178  | 1.220466  | 3.205767  |
| H | 1.457425  | -0.302639 | 3.094426  |

|   |           |          |          |
|---|-----------|----------|----------|
| O | 0.029801  | 2.488445 | 2.563289 |
| H | -0.591838 | 2.835078 | 3.197903 |
| H | -0.450650 | 1.901340 | 1.956837 |
| O | 1.531554  | 4.004467 | 0.746454 |
| H | 1.049395  | 3.590818 | 1.490733 |

E = -534.147960325

G = -534.021593

E +  $\Delta G_{\text{solv}}$  = -534.146592

### **OH<sup>-</sup>-6H<sub>2</sub>O-BHLYP**

|   |           |           |           |
|---|-----------|-----------|-----------|
| O | -0.705260 | 0.641243  | 0.889921  |
| H | 0.539490  | 1.090560  | -0.292744 |
| H | -0.128738 | -0.633894 | 1.371852  |
| H | -1.570061 | 0.659948  | 0.493143  |
| O | 2.957331  | -0.529557 | 0.807854  |
| H | 2.171587  | -1.075005 | 0.920157  |
| O | 0.419134  | -1.416205 | 1.752674  |
| H | -0.156539 | -2.168817 | 1.831960  |
| O | 1.324956  | 1.349836  | -0.813917 |
| H | 1.431419  | 3.196865  | -0.203759 |
| H | 2.034197  | 0.812279  | -0.450390 |
| H | 2.983573  | -0.037127 | 1.633702  |
| O | 1.925518  | 0.395733  | 3.407042  |
| H | 1.418610  | 1.191333  | 3.199653  |
| H | 1.363222  | -0.325468 | 3.106489  |
| O | 0.117926  | 2.416523  | 2.498893  |
| H | -0.573047 | 2.691243  | 3.092828  |
| H | -0.295399 | 1.750928  | 1.851929  |
| O | 1.334381  | 3.992329  | 0.334558  |
| H | 0.953765  | 3.655666  | 1.150051  |

E = -534.289541906

G = -534.162619

E +  $\Delta G_{\text{solv}}$  = -534.348499

### **H<sub>3</sub>O<sup>+</sup>-6H<sub>2</sub>O-BHLYP**

|   |           |           |           |
|---|-----------|-----------|-----------|
| O | -1.098690 | 0.642816  | 0.552804  |
| H | 0.410355  | 1.112631  | -0.649449 |
| H | -0.472340 | -1.096165 | 1.064887  |
| H | -2.005972 | 0.732861  | 0.266066  |
| O | 2.364515  | -0.376859 | 0.875351  |
| H | 1.612672  | -1.018770 | 1.075016  |
| O | 0.254772  | -1.667196 | 1.343871  |
| H | 0.010396  | -2.584073 | 1.240225  |
| O | 1.363694  | 1.218902  | -0.748728 |
| H | 1.576609  | 2.133299  | -0.532034 |
| H | 2.033398  | 0.256778  | 0.131554  |
| H | 2.541037  | 0.182656  | 1.668836  |
| O | 2.541401  | 1.441927  | 2.770257  |
| H | 1.637477  | 1.700418  | 2.995535  |
| H | 3.043318  | 1.358686  | 3.579905  |
| O | -0.031868 | 2.508689  | 2.407752  |
| H | -0.572073 | 2.986477  | 3.035634  |
| H | -0.951688 | 1.277813  | 1.267122  |
| O | 1.976140  | 3.560400  | 0.770601  |
| H | 0.418568  | 3.159113  | 1.853045  |
| H | 2.680595  | 3.228887  | 1.332612  |
| H | 2.247343  | 4.419076  | 0.448115  |

E = -535.210495590

G = -535.055823

E +  $\Delta G_{\text{solv}}$  = -535.269474
